# Supplementary material for: Axonal TDP-43 condensates drive neuromuscular junction disruption through inhibition of local synthesis of nuclear encoded mitochondrial proteins
Source: Nat Commun. 2021 Nov 25;12:6914. doi: 10.1038/s41467-021-27221-8 (PMC8617040; doi:10.1038/s41467-021-27221-8)
Supplement: Supplementary file 5 — Supplementary Data 1 [file 41467_2021_27221_MOESM5_ESM.xlsx]

## Sheet: SN proteomics raw
LFQ intensity 12_TDP	LFQ intensity 411_TDP	LFQ intensity 22_WT	LFQ intensity 410_WT	N: Peptides	N: Razor + unique peptides	N: Unique peptides	N: Sequence coverage [%]	N: Unique + razor sequence coverage [%]	N: Unique sequence coverage [%]	N: Mol. weight [kDa]	N: Q-value	N: Score	N: Intensity	N: MS/MS Count	N: -Log Student's T-test p-value TDP_WT	N: Student's T-test q-value TDP_WT	N: Log2FC TDP_WT	N: Student's T-test Test statistic TDP_WT	Significantly increased TDP vs WT	Significantly decreased TDP vs WT	T: Protein IDs	T: Majority protein IDs	T: Protein names	T: Gene names	T: Gene names_[by_;]_0	C: GOBP name	C: GOMF name	C: GOCC name	Mitocarta
29.0366	28.681	28.58	NaN	11	11	11	32.7	32.7	32.7	53.212	0	143.6	1140500000	22	0	0.999535	0.278813	0	-	-	A2A6T1	A2A6T1	Cerebellar degeneration-related protein 2-like	Cdr2l	Cdr2l	-	-	-
32.979	33.3244	33.1752	32.1946	56	56	56	33.6	33.6	33.6	201.65	0	323.31	28085000000	183	0.333518	0.85777	0.46681	0.753111	-	-	A2A863	A2A863	Integrin beta-4	Itgb4	Itgb4	anatomical structure development;autophagy;biological adhesion;biological regulation;catabolic process;cell adhesion;cell junction assembly;cell junction organization;cell motility;cell projection assembly;cell projection organization;cell surface receptor linked signaling pathway;cell-matrix adhesion;cell-substrate adhesion;cell-substrate junction assembly;cellular catabolic process;cellular com…	binding;G-protein-coupled receptor binding;protein binding;receptor activity;receptor binding	basal plasma membrane;basement membrane;cell junction;cell leading edge;cell part;cell surface;cell-substrate junction;extracellular matrix part;extracellular membrane-bounded organelle;extracellular organelle;extracellular region part;extracellular vesicular exosome;hemidesmosome;integrin complex;macromolecular complex;membrane;membrane part;membrane-bounded organelle;membrane-bounded vesicle;or…
26.7171	27.6081	NaN	NaN	5	5	5	4.6	4.6	4.6	211.49	0	13.364	345330000	6	0	0.99907	NaN	0	-	-	A2A8L5	A2A8L5	Receptor-type tyrosine-protein phosphatase F	Ptprf	Ptprf	anatomical structure morphogenesis;biological adhesion;biological regulation;cell adhesion;cell migration;cell motility;cell part morphogenesis;cell projection morphogenesis;cell projection organization;cellular component morphogenesis;cellular component movement;cellular component organization;cellular component organization at cellular level;cellular component organization or biogenesis;cellula…	binding;carbohydrate binding;catalytic activity;chondroitin sulfate proteoglycan binding;glycoprotein binding;glycosaminoglycan binding;heparin binding;hydrolase activity;hydrolase activity, acting on ester bonds;pattern binding;phosphatase activity;phosphoprotein phosphatase activity;phosphoric ester hydrolase activity;polysaccharide binding;protein binding;protein complex binding;protein tyrosi…	cell body;cell part;cell projection;extracellular membrane-bounded organelle;extracellular organelle;extracellular region part;extracellular vesicular exosome;integral to membrane;intrinsic to membrane;membrane part;membrane-bounded organelle;membrane-bounded vesicle;neuron projection;neuronal cell body;organelle;vesicle
28.9588	29.4494	28.125	NaN	8	8	8	10.3	10.3	10.3	83.108	0	64.743	1273300000	21	0	0.998606	1.07903	0	-	-	A2A8Z1	A2A8Z1	Oxysterol-binding protein-related protein 9	Osbpl9	Osbpl9	establishment of localization;lipid transport;organic substance transport;transport	binding;lipid binding	cell part;cytoplasm;cytoplasmic part;endosomal part;endosome membrane;Golgi apparatus;intracellular membrane-bounded organelle;intracellular organelle;intracellular organelle part;intracellular part;late endosome membrane;membrane;membrane-bounded organelle;organelle;organelle membrane;organelle part
NaN	NaN	28.3227	31.6869	4	4	4	1.6	1.6	1.6	966.58	0	6.7545	2187300000	8	0	0.998142	NaN	0	-	-	A2AAJ9	A2AAJ9	Obscurin	Obscn	Obscn	cell differentiation;cellular developmental process;cellular process;developmental process;multicellular organismal development;multicellular organismal process	adenyl nucleotide binding;adenyl ribonucleotide binding;ankyrin binding;ATP binding;binding;catalytic activity;cytoskeletal protein binding;enzyme regulator activity;GTPase regulator activity;guanyl-nucleotide exchange factor activity;kinase activity;nucleoside-triphosphatase regulator activity;nucleotide binding;phosphotransferase activity, alcohol group as acceptor;protein binding;protein kinas…	cell part;contractile fiber part;cytoplasmic part;cytoskeletal part;intracellular organelle part;intracellular part;M band;macromolecular complex;muscle myosin complex;myosin complex;myosin filament;myosin II complex;organelle part;protein complex;striated muscle myosin thick filament;Z disc	+
29.0691	31.5278	27.698	NaN	7	7	7	13.1	13.1	13.1	101.52	0	55.749	3356800000	19	0	0.997679	2.60041	0	-	-	A2AAY5	A2AAY5	SH3 and PX domain-containing protein 2B	Sh3pxd2b	Sh3pxd2b	adipose tissue development;anatomical structure development;biological regulation;bone development;cell differentiation;cellular component assembly;cellular component disassembly;cellular component disassembly at cellular level;cellular component organization;cellular component organization at cellular level;cellular component organization or biogenesis;cellular component organization or biogenes…	binding;lipid binding;phosphatidylinositol binding;phosphatidylinositol-3,5-bisphosphate binding;phosphatidylinositol-3-phosphate binding;phosphatidylinositol-4-phosphate binding;phosphatidylinositol-5-phosphate binding;phospholipid binding;protein binding;protein domain specific binding;SH2 domain binding	cell junction;cell part;cell projection;cytoplasm;cytoskeletal part;intracellular non-membrane-bounded organelle;intracellular organelle;intracellular organelle part;intracellular part;macromolecular complex;non-membrane-bounded organelle;organelle;organelle part;podosome;protein complex
30.4413	30.7878	30.9306	29.8992	15	15	15	44.4	44.4	44.4	44.59	0	87.981	5033700000	44	0.125653	0.973572	0.199686	0.310071	-	-	A2ADY9;Q9DAF3	A2ADY9	Protein DDI1 homolog 2	Ddi2	Ddi2	-	aspartic-type endopeptidase activity;aspartic-type peptidase activity;catalytic activity;endopeptidase activity;hydrolase activity;peptidase activity;peptidase activity, acting on L-amino acid peptides	-
28.4498	27.7943	27.7018	NaN	4	4	4	24	24	24	19.394	0	36.635	922740000	13	0	0.997216	0.420277	0	-	-	A2AEP0	A2AEP0	-	Obp1b	Obp1b	-	binding;odorant binding;transporter activity	-
29.106	27.9531	32.1612	27.9314	21	21	21	28.2	28.2	28.2	86.049	0	256.33	4593000000	46	0.251411	0.884588	-1.51674	-0.661737	-	-	A2AG50	A2AG50	MAP7 domain-containing protein 2	Map7d2	Map7d2	cellular component organization;cellular component organization at cellular level;cellular component organization or biogenesis;cellular component organization or biogenesis at cellular level;cellular process;cytoskeleton organization;microtubule cytoskeleton organization;microtubule-based process;organelle organization	structural molecule activity	cell part;cytoplasm;cytoskeletal part;cytoskeleton;intracellular non-membrane-bounded organelle;intracellular organelle;intracellular organelle part;intracellular part;macromolecular complex;microtubule;microtubule cytoskeleton;non-membrane-bounded organelle;organelle;organelle part;protein complex
30.5641	30.2805	29.1117	27.2377	24	24	24	16.2	16.2	16.2	225.63	0	101.78	3122000000	53	0.850462	0.727128	2.24759	2.14532	-	-	A2AGT5	A2AGT5	Cytoskeleton-associated protein 5	Ckap5	Ckap5	cell cycle phase;cell cycle process;cell division;cellular component organization;cellular component organization at cellular level;cellular component organization or biogenesis;cellular component organization or biogenesis at cellular level;cellular process;centrosome organization;cytoskeleton organization;establishment of localization;establishment of RNA localization;establishment or maintenan…	binding;cytoskeletal protein binding;microtubule binding;protein binding;ribonucleoprotein binding;tubulin binding	cell part;centrosome;cytoplasm;cytoplasmic part;cytoskeletal part;intracellular non-membrane-bounded organelle;intracellular organelle;intracellular organelle part;intracellular part;macromolecular complex;membrane;microtubule organizing center;non-membrane-bounded organelle;organelle;organelle part;protein complex;spindle pole
25.7414	NaN	27.3493	27.3105	1	1	1	1.8	1.8	1.8	56.878	0.0040277	1.4933	312350000	3	0	0.996753	-1.58851	0	-	-	A2AIG8	A2AIG8	1-aminocyclopropane-1-carboxylate synthase-like protein 1	Accs	Accs	biosynthetic process;metabolic process	binding;catalytic activity;cofactor binding;pyridoxal phosphate binding;vitamin B6 binding;vitamin binding	-
29.9482	30.5664	30.3899	NaN	18	18	18	28.6	28.6	28.6	93.275	0	50.404	3154400000	32	0	0.996291	-0.132565	0	-	-	A2AJI0;O88735	A2AJI0	MAP7 domain-containing protein 1	Map7d1	Map7d1	anatomical structure development;anatomical structure morphogenesis;biological regulation;cell development;cell differentiation;cell morphogenesis;cell proliferation;cellular component morphogenesis;cellular component organization;cellular component organization at cellular level;cellular component organization or biogenesis;cellular component organization or biogenesis at cellular level;cellular…	binding;protein binding;receptor binding;structural molecule activity	basolateral plasma membrane;cell part;cytoplasm;cytoplasmic part;cytoskeletal part;cytoskeleton;intracellular non-membrane-bounded organelle;intracellular organelle;intracellular organelle part;intracellular part;macromolecular complex;membrane;membrane part;microtubule;microtubule cytoskeleton;non-membrane-bounded organelle;organelle;organelle part;perinuclear region of cytoplasm;plasma membrane…
30.3552	31.0278	30.7089	NaN	17	17	16	12.4	12.4	11.1	164.7	0	69.738	4464700000	40	0	0.995829	-0.0174236	0	-	-	A2ALU4;Q1W617	A2ALU4	Protein Shroom2	Shroom2	Shroom2	actin cytoskeleton organization;actin filament organization;actin filament-based process;anatomical structure development;anatomical structure morphogenesis;apical protein localization;asymmetric protein localization;biological regulation;brain development;camera-type eye development;camera-type eye morphogenesis;cell junction maintenance;cell junction organization;cell migration;cell motility;ce…	actin binding;actin filament binding;beta-catenin binding;binding;cytoskeletal protein binding;protein binding;protein domain specific binding	adherens junction;anchoring junction;apical junction complex;apical plasma membrane;basal plasma membrane;cell body;cell cortex;cell junction;cell part;cell-cell adherens junction;cell-cell junction;cytoplasm;cytoplasmic part;cytoskeletal part;cytoskeleton;extracellular membrane-bounded organelle;extracellular organelle;extracellular region part;extracellular vesicular exosome;filamentous actin;i…
31.0443	31.5464	30.4129	29.2444	34	34	34	10.1	10.1	10.1	572.28	0	262.16	5940000000	68	0.83127	0.677817	1.46673	1.99316	-	-	A2AN08	A2AN08	E3 ubiquitin-protein ligase UBR4	Ubr4	Ubr4	cellular macromolecule metabolic process;cellular metabolic process;cellular process;cellular protein metabolic process;macromolecule metabolic process;macromolecule modification;metabolic process;primary metabolic process;protein metabolic process;protein modification by small protein conjugation;protein modification by small protein conjugation or removal;protein modification process;protein ub…	acid-amino acid ligase activity;binding;catalytic activity;cation binding;ion binding;ligase activity;ligase activity, forming carbon-nitrogen bonds;metal ion binding;small conjugating protein ligase activity;transition metal ion binding;ubiquitin-protein ligase activity;zinc ion binding	cell part;centrosome;cytoplasm;cytoplasmic part;cytoskeletal part;integral to membrane;intracellular non-membrane-bounded organelle;intracellular organelle;intracellular organelle part;intracellular part;intrinsic to membrane;membrane;membrane part;microtubule organizing center;non-membrane-bounded organelle;nuclear part;nucleoplasm;organelle;organelle part
27.0416	27.8027	NaN	NaN	13	13	13	13.4	13.4	13.4	123.1	0	36.705	1208100000	21	0	0.995368	NaN	0	-	-	A2APV2;Q6ZPF4	A2APV2	Formin-like protein 2	Fmnl2	Fmnl2	actin cytoskeleton organization;actin filament-based process;biological regulation;cell migration;cell motility;cellular component movement;cellular component organization;cellular component organization at cellular level;cellular component organization or biogenesis;cellular component organization or biogenesis at cellular level;cellular process;cortical actin cytoskeleton organization;cortical …	binding;GTPase activating protein binding;protein binding	cell part;cytoplasm;intracellular part
34.5839	30.2695	29.1075	33.8512	180	180	180	6.7	6.7	6.7	3906.4	0	323.31	39308000000	213	0.0993739	0.973353	0.947368	0.286552	-	-	A2ASS6;REV__Q8BQ48	A2ASS6	Titin	Ttn	Ttn	anatomical structure development;anatomical structure formation involved in morphogenesis;anterior/posterior pattern specification;developmental process;heart development;organ development;pattern specification process;regionalization;segmentation;somitogenesis	adenyl nucleotide binding;adenyl ribonucleotide binding;ankyrin binding;ATP binding;binding;catalytic activity;cation binding;cytoskeletal protein binding;ion binding;kinase activity;metal ion binding;nucleotide binding;phosphotransferase activity, alcohol group as acceptor;protein binding;protein kinase activity;protein serine/threonine kinase activity;purine nucleotide binding;purine ribonucleo…	cell part;cytoplasm;intracellular membrane-bounded organelle;intracellular organelle;intracellular part;membrane-bounded organelle;nucleus;organelle
28.7295	29.8791	27.9868	NaN	14	14	14	18.8	18.8	18.8	120.8	0	93.919	1457300000	22	0	0.994907	1.31749	0	-	-	A2AWA9	A2AWA9	Rab GTPase-activating protein 1	Rabgap1	Rabgap1	biological regulation;cell cycle;cellular process;positive regulation of catalytic activity;positive regulation of GTPase activity;positive regulation of hydrolase activity;positive regulation of molecular function;regulation of biological process;regulation of catabolic process;regulation of catalytic activity;regulation of cellular catabolic process;regulation of cellular metabolic process;regu…	binding;enzyme activator activity;enzyme binding;enzyme regulator activity;GTPase activator activity;GTPase binding;GTPase regulator activity;nucleoside-triphosphatase regulator activity;protein binding;Rab GTPase binding;Ras GTPase binding;small GTPase binding	cell part;cytoplasmic part;cytoskeletal part;cytosol;intracellular organelle part;intracellular part;microtubule organizing center;organelle part
28.0352	28.3133	28.3113	NaN	8	8	8	23.3	23.3	23.3	49.374	0	12.482	777840000	10	0	0.994447	-0.137087	0	-	-	A2BDX3	A2BDX3	Adenylyltransferase and sulfurtransferase MOCS3;Molybdopterin-synthase adenylyltransferase;Molybdopterin-synthase sulfurtransferase	Mocs3	Mocs3	aromatic compound biosynthetic process;biosynthetic process;cellular aromatic compound metabolic process;cellular biosynthetic process;cellular macromolecule metabolic process;cellular metabolic process;cellular nitrogen compound biosynthetic process;cellular nitrogen compound metabolic process;cellular process;cellular protein metabolic process;coenzyme biosynthetic process;coenzyme metabolic pr…	adenyl nucleotide binding;adenyl ribonucleotide binding;adenylyltransferase activity;ATP binding;binding;catalytic activity;cation binding;ion binding;metal ion binding;nucleotide binding;nucleotidyltransferase activity;protein adenylyltransferase activity;purine nucleotide binding;purine ribonucleoside triphosphate binding;purine ribonucleotide binding;ribonucleotide binding;small protein activa…	cell part;cytoplasmic part;cytosol;intracellular part
27.7133	27.4945	27.1703	NaN	3	3	3	15.6	15.6	15.6	36.632	0	18.34	474750000	5	0	0.993987	0.433618	0	-	-	A2RSX7	A2RSX7	tRNA wybutosine-synthesizing protein 5	Tyw5	Tyw5	cellular macromolecule metabolic process;cellular metabolic process;cellular nitrogen compound metabolic process;cellular process;guanosine metabolic process;heterocycle metabolic process;macromolecule metabolic process;macromolecule modification;metabolic process;ncRNA metabolic process;ncRNA processing;nitrogen compound metabolic process;nucleic acid metabolic process;nucleobase-containing comp…	binding;catalytic activity;cation binding;identical protein binding;ion binding;iron ion binding;metal ion binding;nucleic acid binding;oxidoreductase activity;oxidoreductase activity, acting on paired donors, with incorporation or reduction of molecular oxygen;oxidoreductase activity, acting on paired donors, with incorporation or reduction of molecular oxygen, 2-oxoglutarate as one donor, and i…	-
27.704	28.2133	NaN	NaN	7	7	7	9.1	9.1	9.1	127.89	0	13.492	405020000	10	0	0.993528	NaN	0	-	-	A3KGB4	A3KGB4	TBC1 domain family member 8B	Tbc1d8b	Tbc1d8b	-	binding;calcium ion binding;cation binding;enzyme activator activity;enzyme regulator activity;GTPase activator activity;GTPase regulator activity;ion binding;metal ion binding;nucleoside-triphosphatase regulator activity	-
30.1138	30.3354	30.7607	30.8588	15	15	15	40	40	40	52.223	0	89.916	4995000000	45	1.3947	0.84966	-0.58511	-2.64574	-	+	A3KMP2	A3KMP2	Tetratricopeptide repeat protein 38	Ttc38	Ttc38	-	-	extracellular membrane-bounded organelle;extracellular organelle;extracellular region part;extracellular vesicular exosome;membrane-bounded organelle;membrane-bounded vesicle;organelle;vesicle
30.7591	31.216	30.8544	29.8314	29	29	29	30.3	30.3	30.3	139.07	0	122.09	6070000000	83	0.433157	0.763267	0.644629	0.976445	-	-	A6H5Y3	A6H5Y3	Methionine synthase	Mtr	Mtr	amine biosynthetic process;amine metabolic process;aspartate family amino acid biosynthetic process;aspartate family amino acid metabolic process;biosynthetic process;carboxylic acid biosynthetic process;carboxylic acid metabolic process;cellular amine metabolic process;cellular amino acid biosynthetic process;cellular amino acid metabolic process;cellular aromatic compound metabolic process;cell…	5-methyltetrahydrofolate-dependent methyltransferase activity;binding;catalytic activity;cation binding;cobalamin binding;homocysteine S-methyltransferase activity;ion binding;metal ion binding;methionine synthase activity;methyltransferase activity;S-adenosylmethionine-dependent methyltransferase activity;S-methyltransferase activity;tetrapyrrole binding;transferase activity;transferase activity…	cell part;cytoplasm;cytoplasmic part;cytosol;intracellular part
26.5359	27.7726	NaN	NaN	4	4	4	4.3	4.3	4.3	94.128	0	8.0672	349530000	3	0	0.993068	NaN	0	-	-	A6H5Z3	A6H5Z3	Exocyst complex component 6B	Exoc6b	Exoc6b	cellular process;membrane docking;vesicle docking;vesicle docking involved in exocytosis	-	cell cortex part;cell part;cytoplasmic part;exocyst;intracellular part;macromolecular complex;protein complex
28.3204	27.8455	28.6644	30.4871	7	7	7	27.8	27.8	27.8	50.548	0	41.113	1595900000	15	0.595501	0.653592	-1.49284	-1.43299	-	-	A6H630	A6H630	Protein-glutamate O-methyltransferase	Armt1	Armt1	biological regulation;cellular macromolecule metabolic process;cellular metabolic process;cellular process;cellular protein metabolic process;cellular response to stimulus;cellular response to stress;macromolecule metabolic process;macromolecule methylation;macromolecule modification;metabolic process;methylation;one-carbon metabolic process;primary metabolic process;protein alkylation;protein me…	carboxyl-O-methyltransferase activity;catalytic activity;methyltransferase activity;O-methyltransferase activity;protein carboxyl O-methyltransferase activity;protein methyltransferase activity;S-adenosylmethionine-dependent methyltransferase activity;transferase activity;transferase activity, transferring one-carbon groups	-
27.9999	27.7974	27.7412	NaN	9	9	9	7.2	7.2	7.2	155.27	0	23.765	668110000	9	0	0.99261	0.157495	0	-	-	A6X8Z5;Q640N3	A6X8Z5	Rho GTPase-activating protein 31	Arhgap31	Arhgap31	biological regulation;cellular process;cellular response to stimulus;intracellular signal transduction;positive regulation of catalytic activity;positive regulation of GTPase activity;positive regulation of hydrolase activity;positive regulation of molecular function;regulation of biological process;regulation of catabolic process;regulation of catalytic activity;regulation of cellular catabolic …	binding;enzyme activator activity;enzyme regulator activity;GTPase activator activity;GTPase regulator activity;nucleoside-triphosphatase regulator activity;protein binding;protein domain specific binding;SH3 domain binding	adherens junction;anchoring junction;cell junction;cell part;cell projection;cell-substrate adherens junction;cell-substrate junction;cytoplasmic membrane-bounded vesicle;cytoplasmic part;cytoplasmic vesicle;focal adhesion;intracellular;intracellular membrane-bounded organelle;intracellular organelle;intracellular part;lamellipodium;membrane-bounded organelle;membrane-bounded vesicle;organelle;ve…
32.491	32.0075	32.2051	32.014	33	33	33	39.7	39.7	39.7	104.66	0	273.84	16061000000	107	0.190686	0.953222	0.139753	0.388279	-	-	A6X935;CON__Q3T052	A6X935	Inter alpha-trypsin inhibitor, heavy chain 4	Itih4	Itih4	acute inflammatory response;acute-phase response;amine metabolic process;aminoglycan metabolic process;carbohydrate metabolic process;defense response;glycosaminoglycan metabolic process;hyaluronan metabolic process;inflammatory response;macromolecule metabolic process;metabolic process;nitrogen compound metabolic process;polysaccharide metabolic process;primary metabolic process;response to chem…	endopeptidase inhibitor activity;endopeptidase regulator activity;enzyme inhibitor activity;enzyme regulator activity;peptidase inhibitor activity;peptidase regulator activity;serine-type endopeptidase inhibitor activity	blood microparticle;cell part;cytoplasm;extracellular membrane-bounded organelle;extracellular organelle;extracellular region part;extracellular vesicular exosome;intracellular part;membrane;membrane-bounded organelle;membrane-bounded vesicle;organelle;plasma membrane;vesicle
NaN	NaN	28.4396	26.663	7	7	7	13.9	13.9	13.9	76.433	0	9.011	451670000	9	0	0.992151	NaN	0	-	-	B1AVD1	B1AVD1	-	Xpnpep2	Xpnpep2	-	aminopeptidase activity;binding;catalytic activity;cation binding;exopeptidase activity;hydrolase activity;ion binding;metal ion binding;peptidase activity;peptidase activity, acting on L-amino acid peptides	extracellular membrane-bounded organelle;extracellular organelle;extracellular region part;extracellular vesicular exosome;membrane-bounded organelle;membrane-bounded vesicle;organelle;vesicle
29.1398	29.194	28.4865	NaN	11	11	11	6.5	6.5	6.5	294	0	11.725	1444400000	16	0	0.991694	0.680396	0	-	-	B1AY13	B1AY13	Ubiquitin carboxyl-terminal hydrolase 24	Usp24	Usp24	biological regulation;catabolic process;cellular catabolic process;cellular macromolecule catabolic process;cellular macromolecule metabolic process;cellular metabolic process;cellular process;cellular protein metabolic process;macromolecule catabolic process;macromolecule metabolic process;macromolecule modification;metabolic process;modification-dependent macromolecule catabolic process;modific…	catalytic activity;cysteine-type endopeptidase activity;cysteine-type peptidase activity;endopeptidase activity;hydrolase activity;peptidase activity;peptidase activity, acting on L-amino acid peptides;small conjugating protein-specific protease activity;ubiquitin-specific protease activity	-
28.3036	28.9458	NaN	NaN	11	10	10	28.1	26.7	26.7	59.096	0	75.125	1349700000	11	0	0.991236	NaN	0	-	-	B2RPU2	B2RPU2	Pleckstrin homology domain-containing family D member 1	Plekhd1	Plekhd1	-	-	-
31.7173	31.7785	31.3347	28.3436	30	30	30	17.6	17.6	17.6	243.24	0	191.05	8722100000	90	0.481366	0.674615	1.90879	1.19609	-	-	B2RQC6	B2RQC6	CAD protein;Glutamine-dependent carbamoyl-phosphate synthase;Aspartate carbamoyltransferase;Dihydroorotase	Cad	Cad	amide biosynthetic process;amine biosynthetic process;amine catabolic process;amine metabolic process;anatomical structure development;anatomical structure morphogenesis;arginine biosynthetic process;arginine metabolic process;biological regulation;biosynthetic process;body fluid secretion;carbamoyl phosphate biosynthetic process;carbamoyl phosphate metabolic process;carboxylic acid biosynthetic …	adenyl nucleotide binding;adenyl ribonucleotide binding;amine binding;amino acid binding;aspartate carbamoyltransferase activity;ATP binding;binding;carbamoyl-phosphate synthase (ammonia) activity;carbamoyl-phosphate synthase (glutamine-hydrolyzing) activity;carbon-nitrogen ligase activity, with glutamine as amido-N-donor;carboxyl- or carbamoyltransferase activity;carboxylic acid binding;catalyti…	axon part;cell body;cell part;cell projection part;cytoplasm;cytoplasmic part;cytosol;extracellular membrane-bounded organelle;extracellular organelle;extracellular region part;extracellular vesicular exosome;intracellular membrane-bounded organelle;intracellular organelle;intracellular organelle part;intracellular part;macromolecular complex;membrane;membrane-bounded organelle;membrane-bounded v…
29.7785	28.8197	30.4545	29.0944	18	8	7	41	26.3	22.9	40.361	0	91.635	2676500000	22	0.203813	0.9319	-0.475355	-0.510001	-	-	B2RSH2	B2RSH2	Guanine nucleotide-binding protein G(i) subunit alpha-1	Gnai1	Gnai1	biological regulation;cAMP-mediated signaling;cell cycle;cell division;cell surface receptor linked signaling pathway;cellular process;cellular response to stimulus;cyclic-nucleotide-mediated signaling;G-protein coupled receptor protein signaling pathway;G-protein signaling, coupled to cAMP nucleotide second messenger;G-protein signaling, coupled to cyclic nucleotide second messenger;intracellula…	binding;catalytic activity;cation binding;G-protein beta/gamma-subunit complex binding;G-protein-coupled receptor binding;GTP binding;GTPase activity;guanyl nucleotide binding;guanyl ribonucleotide binding;hydrolase activity;hydrolase activity, acting on acid anhydrides;hydrolase activity, acting on acid anhydrides, in phosphorus-containing anhydrides;ion binding;metabotropic serotonin receptor b…	cell part;centrosome;cytoplasm;cytoplasmic part;cytoskeletal part;extracellular membrane-bounded organelle;extracellular organelle;extracellular region part;extracellular vesicular exosome;extrinsic to internal side of plasma membrane;extrinsic to membrane;extrinsic to plasma membrane;heterotrimeric G-protein complex;intracellular;intracellular membrane-bounded organelle;intracellular non-membran…
29.1777	28.8867	28.8344	28.2647	8	8	8	14.5	14.5	14.5	92.908	0	36.705	1616600000	25	0.568007	0.67898	0.482629	1.14946	-	-	B2RUJ5;P98084	B2RUJ5	Amyloid beta A4 precursor protein-binding family A member 1	Apba1	Apba1	amine transport;amino acid transport;behavior;biological regulation;carboxylic acid transport;cell communication;cell-cell signaling;cellular component assembly;cellular component organization;cellular component organization or biogenesis;cellular process;chordate embryonic development;developmental process;embryo development;embryo development ending in birth or egg hatching;establishment of loc…	beta-amyloid binding;binding;lipid binding;phosphatidylinositol binding;phosphatidylinositol-4,5-bisphosphate binding;phospholipid binding;protein binding	cell part;clathrin-coated vesicle;coated vesicle;cytoplasmic membrane-bounded vesicle;cytoplasmic part;cytoplasmic vesicle;Golgi apparatus;intracellular membrane-bounded organelle;intracellular organelle;intracellular part;macromolecular complex;membrane;membrane-bounded organelle;membrane-bounded vesicle;nucleus;organelle;perinuclear region of cytoplasm;plasma membrane;protein complex;synapse pa…
32.5228	33.3711	32.687	31.898	19	19	19	28	28	28	91.982	0	49.29	27083000000	41	0.424964	0.759961	0.654428	0.963395	-	-	B2RUR8;Q8R554	B2RUR8	OTU domain-containing protein 7B	Otud7b	Otud7b	biological regulation;cellular macromolecule metabolic process;cellular metabolic process;cellular process;cellular protein metabolic process;immune response;immune system process;macromolecule metabolic process;macromolecule modification;metabolic process;mucosal immune response;negative regulation of biological process;negative regulation of biosynthetic process;negative regulation of cell comm…	binding;catalytic activity;cation binding;cysteine-type peptidase activity;DNA binding;hydrolase activity;ion binding;K63-linked polyubiquitin binding;metal ion binding;nucleic acid binding;peptidase activity;peptidase activity, acting on L-amino acid peptides;polyubiquitin binding;protein binding;small conjugating protein binding;small conjugating protein-specific protease activity;transition me…	cell part;cytoplasm;intracellular membrane-bounded organelle;intracellular organelle;intracellular part;membrane-bounded organelle;nucleus;organelle
29.6821	29.9902	NaN	NaN	10	10	10	13.5	13.5	13.5	107.38	0	30.513	1671700000	15	0	0.990779	NaN	0	-	-	B2RXR6	B2RXR6	Serine/threonine-protein phosphatase 6 regulatory ankyrin repeat subunit B	Ankrd44	Ankrd44	-	-	-
30.1879	30.1788	31.016	NaN	11	11	11	8.2	8.2	8.2	206.23	0	22.84	3964800000	17	0	0.990323	-0.832705	0	-	-	B2RXS4	B2RXS4	Plexin-B2	Plxnb2	Plxnb2	anatomical structure development;anatomical structure formation involved in morphogenesis;biological regulation;brain development;cell proliferation;cell surface receptor linked signaling pathway;cellular process;cellular response to stimulus;developmental process;neural precursor cell proliferation;neural tube closure;neuroblast proliferation;organ development;positive regulation of axonogenesis…	molecular transducer activity;receptor activity;semaphorin receptor activity;signal transducer activity;signaling receptor activity;transmembrane signaling receptor activity	cell part;cell surface;extracellular membrane-bounded organelle;extracellular organelle;extracellular region part;extracellular vesicular exosome;integral to membrane;integral to plasma membrane;intracellular;intrinsic to membrane;intrinsic to plasma membrane;membrane part;membrane-bounded organelle;membrane-bounded vesicle;organelle;plasma membrane part;vesicle
26.8896	26.2963	25.5734	27.7848	5	5	5	27.8	27.8	27.8	29.608	0	15.873	364930000	9	0.0237077	0.993194	-0.0861301	-0.0691931	-	-	C0HKG6;C0HKG5	C0HKG6;C0HKG5	-	-	-	-	-	-
31.6568	31.5037	31.7859	28.9162	26	26	26	61.6	61.6	61.6	52.938	0	323.31	8764900000	86	0.316577	0.839541	1.22925	0.799813	-	-	D3YZP9	D3YZP9	Coiled-coil domain-containing protein 6	Ccdc6	Ccdc6	-	-	cell part;cytoplasm;cytoskeleton;intracellular non-membrane-bounded organelle;intracellular organelle;intracellular part;non-membrane-bounded organelle;organelle
29.0142	29.3265	30.2535	28.1838	3	3	3	22.9	22.9	22.9	16.037	0	137.56	2210600000	13	0.0143932	0.995985	-0.048274	-0.0421028	-	-	D3Z4S3	D3Z4S3	Putative peptidyl-tRNA hydrolase PTRHD1	Ptrhd1	Ptrhd1	-	aminoacyl-tRNA hydrolase activity;carboxylic ester hydrolase activity;catalytic activity;hydrolase activity;hydrolase activity, acting on ester bonds	extracellular membrane-bounded organelle;extracellular organelle;extracellular region part;extracellular vesicular exosome;membrane-bounded organelle;membrane-bounded vesicle;organelle;vesicle
30.2786	27.7496	31.3036	29.7892	15	15	15	31.2	31.2	31.2	73.963	0	114.62	3948600000	33	0.389664	0.760701	-1.53229	-0.973575	-	-	D3Z7P3	D3Z7P3	Glutaminase kidney isoform, mitochondrial	Gls	Gls	amine biosynthetic process;amine catabolic process;amine metabolic process;behavior;behavioral interaction between organisms;biological regulation;biosynthetic process;carboxylic acid biosynthetic process;carboxylic acid catabolic process;carboxylic acid metabolic process;catabolic process;cell communication;cell-cell signaling;cellular amine metabolic process;cellular amino acid biosynthetic pro…	catalytic activity;glutaminase activity;hydrolase activity;hydrolase activity, acting on carbon-nitrogen (but not peptide) bonds;hydrolase activity, acting on carbon-nitrogen (but not peptide) bonds, in linear amides	cell part;cytoplasmic part;cytosol;intracellular membrane-bounded organelle;intracellular organelle;intracellular part;membrane-bounded organelle;mitochondrion;organelle	+
35.2583	35.6725	34.6129	34.1095	44	44	44	35.5	35.5	35.5	87.428	0	323.31	115300000000	316	1.11246	0.804854	1.1042	2.59229	-	-	E9PV24;CON__P02672	E9PV24	Fibrinogen alpha chain;Fibrinopeptide A;Fibrinogen alpha chain	Fga	Fga	antibacterial humoral response;antimicrobial humoral response;biological adhesion;biological regulation;blood coagulation;blood coagulation, common pathway;cell adhesion;cell-cell adhesion;cell-matrix adhesion;cell-substrate adhesion;cellular component assembly;cellular component assembly at cellular level;cellular component organization;cellular component organization at cellular level;cellular …	structural molecule activity	blood microparticle;cell cortex;cell part;cell surface;cytoplasmic membrane-bounded vesicle;cytoplasmic part;cytoplasmic vesicle;external side of plasma membrane;extracellular membrane-bounded organelle;extracellular organelle;extracellular region part;extracellular space;extracellular vesicular exosome;fibrinogen complex;intracellular membrane-bounded organelle;intracellular organelle;intracellu…
31.1705	31.6178	30.2333	NaN	32	32	32	15.8	15.8	15.8	293.02	0	119.49	6146400000	57	0	0.989866	1.16086	0	-	-	E9PVA8	E9PVA8	-	Gcn1l1	Gcn1l1	-	-	cell part;cytoplasm;intracellular part;membrane
28.5099	27.8809	28.0115	NaN	4	4	3	13.2	13.2	10.2	52.982	0	35.631	810770000	13	0	0.989411	0.183888	0	-	-	E9Q3E1	E9Q3E1	Aldehyde dehydrogenase	Aldh3b2	Aldh3b2	cellular aldehyde metabolic process;cellular metabolic process;cellular process;metabolic process	3-chloroallyl aldehyde dehydrogenase activity;aldehyde dehydrogenase (NAD) activity;aldehyde dehydrogenase [NAD(P)+] activity;catalytic activity;oxidoreductase activity;oxidoreductase activity, acting on the aldehyde or oxo group of donors;oxidoreductase activity, acting on the aldehyde or oxo group of donors, NAD or NADP as acceptor	-
26.5742	25.8819	NaN	NaN	14	3	3	6.1	1.3	1.3	275.75	0.00047214	2.2271	761100000	5	0	0.988955	NaN	0	-	-	E9Q4Z2	E9Q4Z2	Acetyl-CoA carboxylase 2;Biotin carboxylase	Acacb	Acacb	acetyl-CoA metabolic process;biological regulation;biosynthetic process;carboxylic acid biosynthetic process;carboxylic acid metabolic process;cellular biosynthetic process;cellular component assembly;cellular component organization;cellular component organization or biogenesis;cellular ketone metabolic process;cellular lipid metabolic process;cellular metabolic process;cellular process;coenzyme …	acetyl-CoA carboxylase activity;adenyl nucleotide binding;adenyl ribonucleotide binding;ATP binding;binding;biotin binding;biotin carboxylase activity;carboxylic acid binding;catalytic activity;cation binding;CoA carboxylase activity;ion binding;ligase activity;ligase activity, forming carbon-carbon bonds;ligase activity, forming carbon-nitrogen bonds;metal ion binding;monocarboxylic acid binding…	cell part;cytoplasmic part;endomembrane system;intracellular membrane-bounded organelle;intracellular organelle;intracellular part;membrane;membrane-bounded organelle;mitochondrion;nucleus;organelle	+
NaN	NaN	28.9756	25.7353	10	10	10	3.3	3.3	3.3	332.91	0	5.1156	869360000	10	0	0.9885	NaN	0	-	-	E9Q557	E9Q557	Desmoplakin	Dsp	Dsp	adherens junction organization;anatomical structure development;anatomical structure morphogenesis;biological adhesion;cardiac muscle tissue morphogenesis;cell adhesion;cell differentiation;cell junction organization;cell-cell adhesion;cell-cell junction organization;cellular component organization;cellular component organization at cellular level;cellular component organization or biogenesis;cel…	binding;binding, bridging;enzyme binding;kinase binding;protein binding;protein binding, bridging;protein kinase binding;protein kinase C binding;scaffold protein binding;structural molecule activity	adherens junction;anchoring junction;basolateral plasma membrane;cell junction;cell part;cell-cell adherens junction;cell-cell contact zone;cell-cell junction;cornified envelope;cytoplasm;cytoskeleton;desmosome;extracellular membrane-bounded organelle;extracellular organelle;extracellular region part;extracellular vesicular exosome;fascia adherens;intercalated disc;intracellular membrane-bounded …
30.4053	29.1617	30.5387	25.7027	20	20	18	23.9	23.9	21.2	126.82	0	67.914	3081400000	42	0.241127	0.885505	1.66279	0.64035	-	-	E9Q634	E9Q634	Unconventional myosin-Ie	Myo1e	Myo1e	anatomical structure development;biological regulation;cell development;cell differentiation;cell surface receptor linked signaling pathway;cellular component organization;cellular component organization at cellular level;cellular component organization or biogenesis;cellular component organization or biogenesis at cellular level;cellular developmental process;cellular membrane organization;cellu…	actin binding;actin filament binding;adenyl nucleotide binding;adenyl ribonucleotide binding;ATP binding;ATPase activity;ATPase activity, coupled;binding;calmodulin binding;catalytic activity;cytoskeletal protein binding;hydrolase activity;hydrolase activity, acting on acid anhydrides;hydrolase activity, acting on acid anhydrides, in phosphorus-containing anhydrides;lipid binding;motor activity;n…	adherens junction;anchoring junction;brush border;cell junction;cell part;cell projection;cell-cell junction;clathrin-coated endocytic vesicle;clathrin-coated vesicle;coated vesicle;cytoplasm;cytoplasmic membrane-bounded vesicle;cytoplasmic part;cytoplasmic vesicle;cytoskeletal part;cytoskeleton;endocytic vesicle;extracellular membrane-bounded organelle;extracellular organelle;extracellular regio…
29.7271	30.0285	29.4327	NaN	29	29	29	15.6	15.6	15.6	273.99	0	126.66	4857900000	37	0	0.988046	0.445109	0	-	-	F6ZDS4	F6ZDS4	Nucleoprotein TPR	Tpr	Tpr	biological regulation;cell cycle checkpoint;cell cycle phase;cell cycle process;cell division;cellular component organization;cellular component organization at cellular level;cellular component organization or biogenesis;cellular component organization or biogenesis at cellular level;cellular macromolecular complex subunit organization;cellular process;cellular response to chemical stimulus;cell…	binding;chromatin binding;cytoskeletal protein binding;dynein complex binding;enzyme binding;heat shock protein binding;identical protein binding;kinase binding;mitogen-activated protein kinase binding;mRNA binding;nucleic acid binding;nucleocytoplasmic transporter activity;protein binding;protein complex binding;protein dimerization activity;protein homodimerization activity;protein kinase bindi…	cell part;chromosomal part;cytoplasm;cytoplasmic dynein complex;cytoplasmic part;cytoskeletal part;dynein complex;envelope;extrinsic to membrane;inclusion body;intracellular membrane-bounded organelle;intracellular non-membrane-bounded organelle;intracellular organelle;intracellular organelle part;intracellular part;kinetochore;macromolecular complex;membrane;membrane part;membrane-bounded organe…
31.4382	31.0045	31.6823	30.6642	22	22	11	25.2	25.2	14.6	134.75	0	83.635	8101600000	53	0.0275014	0.992113	0.0481033	0.073633	-	-	G5E829	G5E829	Plasma membrane calcium-transporting ATPase 1	Atp2b1	Atp2b1	calcium ion transport;cation transport;divalent inorganic cation transport;divalent metal ion transport;establishment of localization;ion transport;metal ion transport;transport	active transmembrane transporter activity;adenyl nucleotide binding;adenyl ribonucleotide binding;ATP binding;ATPase activity;ATPase activity, coupled;ATPase activity, coupled to movement of substances;ATPase activity, coupled to transmembrane movement of ions;ATPase activity, coupled to transmembrane movement of ions, phosphorylative mechanism;ATPase activity, coupled to transmembrane movement o…	cell junction;cell part;extracellular membrane-bounded organelle;extracellular organelle;extracellular region part;extracellular vesicular exosome;integral to membrane;integral to plasma membrane;intracellular membrane-bounded organelle;intracellular organelle;intracellular part;intrinsic to membrane;intrinsic to plasma membrane;membrane;membrane part;membrane-bounded organelle;membrane-bounded v…
28.7714	28.583	28.8074	NaN	9	9	9	23.1	23.1	23.1	57.685	0	41.68	1231500000	20	0	0.987592	-0.130203	0	-	-	G5E897	G5E897	-	Kdelc2	Kdelc2	-	-	-
30.6486	29.9794	31.0115	28.087	33	24	24	23.6	20.3	20.3	214.06	0	98.633	4165700000	58	0.17988	0.937577	0.764728	0.477943	-	-	G5E8K5	G5E8K5	Ankyrin-3	Ank3	Ank3	anatomical structure morphogenesis;axon guidance;axonogenesis;biological regulation;cation homeostasis;cell cycle cytokinesis;cell cycle process;cell part morphogenesis;cell projection morphogenesis;cell projection organization;cellular chemical homeostasis;cellular component assembly;cellular component assembly at cellular level;cellular component morphogenesis;cellular component organization;ce…	binding;ion channel binding;protein binding;structural constituent of cytoskeleton;structural molecule activity	axon;axon part;basal plasma membrane;basolateral plasma membrane;cell junction;cell part;cell projection;cell projection part;cell-cell contact zone;cell-cell junction;contractile fiber part;cytoplasmic part;cytoskeleton;dendrite;endoplasmic reticulum;initial segment;intercalated disc;intracellular membrane-bounded organelle;intracellular non-membrane-bounded organelle;intracellular organelle;int…
29.9881	29.1524	28.804	33.6641	38	34	34	38.5	36.4	36.4	102.53	0	304.45	10672000000	72	0.244605	0.883102	-1.6638	-0.648474	-	-	O08528	O08528	Hexokinase-2	Hk2	Hk2	alcohol catabolic process;alcohol metabolic process;apoptotic mitochondrial changes;biological regulation;body fluid secretion;carbohydrate catabolic process;carbohydrate homeostasis;carbohydrate metabolic process;carbohydrate phosphorylation;catabolic process;cellular carbohydrate catabolic process;cellular carbohydrate metabolic process;cellular chemical homeostasis;cellular component organizat…	adenyl nucleotide binding;adenyl ribonucleotide binding;ATP binding;binding;carbohydrate binding;carbohydrate kinase activity;catalytic activity;fructokinase activity;glucokinase activity;glucose binding;hexokinase activity;kinase activity;mannokinase activity;monosaccharide binding;nucleotide binding;phosphotransferase activity, alcohol group as acceptor;purine nucleotide binding;purine ribonucl…	cell part;cytoplasmic part;cytosol;intracellular membrane-bounded organelle;intracellular organelle;intracellular organelle part;intracellular part;membrane;membrane-bounded organelle;mitochondrial membrane;mitochondrial outer membrane;mitochondrial part;mitochondrion;organelle;organelle membrane;organelle outer membrane;organelle part;outer membrane	+
35.5777	35.9705	35.7513	34.5309	46	46	46	60.1	60.1	60.1	79.871	0	323.31	166370000000	393	0.369071	0.815232	0.633001	0.854233	-	-	O08529	O08529	Calpain-2 catalytic subunit	Capn2	Capn2	anatomical structure development;anatomical structure formation involved in morphogenesis;biological regulation;blastocyst development;cellular process;cellular response to acid;cellular response to amine stimulus;cellular response to amino acid stimulus;cellular response to chemical stimulus;cellular response to endogenous stimulus;cellular response to organic nitrogen;cellular response to organ…	binding;calcium ion binding;calcium-dependent cysteine-type endopeptidase activity;catalytic activity;cation binding;cysteine-type endopeptidase activity;cysteine-type peptidase activity;endopeptidase activity;hydrolase activity;ion binding;metal ion binding;peptidase activity;peptidase activity, acting on L-amino acid peptides	adherens junction;anchoring junction;cell junction;cell part;cell projection;cell-substrate adherens junction;cell-substrate junction;chromatin;chromosomal part;cytoplasm;cytoplasmic part;cytosol;dendrite;endoplasmic reticulum;endoplasmic reticulum part;extracellular membrane-bounded organelle;extracellular organelle;extracellular region part;extracellular vesicular exosome;focal adhesion;Golgi a…
29.4903	29.0711	29.9352	31.1718	15	15	15	19.8	19.8	19.8	124.63	0	131.33	3388300000	49	0.72002	0.665288	-1.27283	-1.69065	-	-	O08532	O08532	Voltage-dependent calcium channel subunit alpha-2/delta-1;Voltage-dependent calcium channel subunit alpha-2-1;Voltage-dependent calcium channel subunit delta-1	Cacna2d1	Cacna2d1	biological regulation;calcium ion transmembrane transport;calcium ion transport;cation transport;cellular process;divalent inorganic cation transport;divalent metal ion transport;establishment of localization;ion transmembrane transport;ion transport;metal ion transport;regulation of biological process;regulation of calcium ion transport;regulation of ion transport;regulation of localization;regu…	binding;calcium channel activity;calcium channel regulator activity;cation binding;cation channel activity;cation transmembrane transporter activity;channel activity;channel regulator activity;gated channel activity;ion binding;ion channel activity;ion transmembrane transporter activity;metal ion binding;passive transmembrane transporter activity;substrate-specific channel activity;substrate-spec…	calcium channel complex;cation channel complex;cell part;cytoplasmic part;endoplasmic reticulum;extracellular membrane-bounded organelle;extracellular organelle;extracellular region part;extracellular vesicular exosome;intracellular membrane-bounded organelle;intracellular organelle;intracellular part;ion channel complex;macromolecular complex;membrane part;membrane-bounded organelle;membrane-bou…
32.8695	33.0552	32.0966	34.2682	32	32	29	52.4	52.4	51	64.469	0	323.31	30186000000	123	0.0661825	0.987784	-0.220049	-0.184951	-	-	O08539;D3Z6Q9	O08539	Myc box-dependent-interacting protein 1	Bin1	Bin1	biological regulation;cell chemotaxis;cell differentiation;cell migration;cell motility;cellular component assembly;cellular component assembly at cellular level;cellular component movement;cellular component organization;cellular component organization at cellular level;cellular component organization or biogenesis;cellular component organization or biogenesis at cellular level;cellular developm…	binding;cytoskeletal protein binding;enzyme binding;identical protein binding;lipid binding;phospholipid binding;protein binding;RNA polymerase binding;tau protein binding	axon;axon part;axon terminus;cell cortex;cell junction;cell part;cell projection;cell projection part;cerebellar mossy fiber;clathrin-coated vesicle;coated vesicle;contractile fiber part;cytoplasm;cytoplasmic membrane-bounded vesicle;cytoplasmic part;cytoplasmic vesicle;cytoskeletal part;I band;initial segment;intracellular membrane-bounded organelle;intracellular non-membrane-bounded organelle;i…
29.9811	30.7727	29.5041	27.8709	13	13	13	61.9	61.9	61.9	24.74	0	96.703	3090300000	34	0.691037	0.673352	1.68942	1.67697	-	-	O08547	O08547	Vesicle-trafficking protein SEC22b	Sec22b	Sec22b	biological regulation;cellular component organization;cellular component organization at cellular level;cellular component organization or biogenesis;cellular component organization or biogenesis at cellular level;cellular membrane fusion;cellular membrane organization;cellular process;ER to Golgi vesicle-mediated transport;establishment of localization;establishment of localization in cell;estab…	binding;protein binding;SNAP receptor activity;SNARE binding	cell part;cytoplasmic membrane-bounded vesicle;cytoplasmic part;cytoplasmic vesicle;endoplasmic reticulum membrane;endoplasmic reticulum part;endoplasmic reticulum-Golgi intermediate compartment;endoplasmic reticulum-Golgi intermediate compartment membrane;Golgi apparatus part;Golgi membrane;integral to membrane;intracellular membrane-bounded organelle;intracellular organelle;intracellular organe…
38.5993	38.9428	39.1389	38.5972	83	83	73	88.6	88.6	83.9	62.277	0	323.31	1751100000000	1592	0.101908	0.979715	-0.0970173	-0.230586	-	-	O08553	O08553	Dihydropyrimidinase-related protein 2	Dpysl2	Dpysl2	anatomical structure development;axon guidance;biological regulation;cellular component organization;cellular component organization at cellular level;cellular component organization or biogenesis;cellular component organization or biogenesis at cellular level;cellular membrane organization;cellular process;chemotaxis;cytoskeleton organization;developmental process;endocytosis;establishment of lo…	binding;catalytic activity;enzyme binding;hydrolase activity;hydrolase activity, acting on carbon-nitrogen (but not peptide) bonds;kinase binding;protein binding;protein kinase binding	axon;axon part;cell body;cell part;cell projection;cell projection part;cytoplasmic part;cytoskeletal part;cytosol;dendrite;extracellular membrane-bounded organelle;extracellular organelle;extracellular region part;extracellular vesicular exosome;growth cone;intracellular membrane-bounded organelle;intracellular organelle;intracellular organelle part;intracellular part;macromolecular complex;memb…
29.1062	29.872	28.3873	28.3877	16	16	16	39.4	39.4	39.4	72.3	0	103.74	1845700000	31	0.989002	0.785806	1.10164	2.28122	-	-	O08582	O08582	GTP-binding protein 1	Gtpbp1	Gtpbp1	biological regulation;metabolic process;positive regulation of biological process;positive regulation of catabolic process;positive regulation of cellular catabolic process;positive regulation of cellular metabolic process;positive regulation of cellular process;positive regulation of macromolecule metabolic process;positive regulation of metabolic process;positive regulation of mRNA catabolic pr…	binding;catalytic activity;GTP binding;GTPase activity;guanyl nucleotide binding;guanyl ribonucleotide binding;hydrolase activity;hydrolase activity, acting on acid anhydrides;hydrolase activity, acting on acid anhydrides, in phosphorus-containing anhydrides;nucleoside-triphosphatase activity;nucleotide binding;purine nucleotide binding;purine ribonucleoside triphosphate binding;purine ribonucleo…	cell part;cytoplasmic exosome (RNase complex);cytoplasmic part;cytosol;exosome (RNase complex);intracellular part;macromolecular complex;membrane;protein complex
31.0254	30.4643	30.331	29.9001	7	7	7	34.1	34.1	34.1	26.94	0	52.172	4906900000	31	0.663202	0.662365	0.629326	1.38707	-	-	O08583;Q9JJW6	O08583;Q9JJW6	THO complex subunit 4;Aly/REF export factor 2	Alyref;Alyref2	Alyref	cellular macromolecule metabolic process;cellular metabolic process;cellular nitrogen compound metabolic process;cellular process;establishment of localization;establishment of RNA localization;macromolecule metabolic process;metabolic process;mRNA metabolic process;mRNA processing;mRNA transport;nitrogen compound metabolic process;nucleic acid metabolic process;nucleic acid transport;nucleobase-…	binding;DNA binding;nucleic acid binding;nucleotide binding;RNA binding;single-stranded DNA binding;structure-specific DNA binding	cell part;cytoplasm;intracellular membrane-bounded organelle;intracellular organelle;intracellular organelle part;intracellular part;macromolecular complex;membrane-bounded organelle;nuclear body;nuclear part;nuclear speck;nucleoplasm part;nucleus;organelle;organelle part;ribonucleoprotein complex;spliceosomal complex
33.3851	33.4455	33.0784	31.8352	10	10	10	27.2	27.2	27.2	25.604	0	166.06	28770000000	72	0.57935	0.670471	0.958515	1.32694	-	-	O08585	O08585	Clathrin light chain A	Clta	Clta	cellular component organization;cellular component organization or biogenesis;cellular membrane organization;cellular process;clathrin-mediated endocytosis;endocytosis;establishment of localization;establishment of localization in cell;establishment of protein localization;intracellular protein transport;intracellular transport;membrane invagination;membrane organization;protein transport;recepto…	binding;clathrin binding;clathrin heavy chain binding;protein binding;structural molecule activity	cell part;clathrin coat;clathrin coat of coated pit;clathrin coat of trans-Golgi network vesicle;clathrin complex;clathrin vesicle coat;cytoplasmic membrane-bounded vesicle;cytoplasmic part;cytoplasmic vesicle;cytoplasmic vesicle part;Golgi apparatus part;intracellular membrane-bounded organelle;intracellular organelle;intracellular organelle part;intracellular part;macromolecular complex;membran…
28.7634	28.4045	29.0634	NaN	5	5	5	11.4	11.4	11.4	47.152	0	6.7683	1224400000	13	0	0.987138	-0.479458	0	-	-	O08586	O08586	Phosphatidylinositol 3,4,5-trisphosphate 3-phosphatase and dual-specificity protein phosphatase PTEN	Pten	Pten	activation of anaphase-promoting complex activity;activation of mitotic anaphase-promoting complex activity;adult behavior;aging;anatomical structure development;anatomical structure formation involved in morphogenesis;anatomical structure morphogenesis;angiogenesis;apoptosis;axonogenesis;behavior;behavioral interaction between organisms;biological regulation;brain morphogenesis;canonical Wnt rec…	anaphase-promoting complex binding;binding;catalytic activity;cation binding;enzyme binding;hydrolase activity;hydrolase activity, acting on ester bonds;inositol or phosphatidylinositol phosphatase activity;inositol phosphate phosphatase activity;inositol tetrakisphosphate phosphatase activity;inositol-1,3,4,5-tetrakisphosphate 3-phosphatase activity;ion binding;kinase binding;lipid phosphatase a…	cell part;cell projection;cell projection part;cytoplasm;cytoplasmic part;dendritic spine;internal side of plasma membrane;intracellular membrane-bounded organelle;intracellular organelle;intracellular organelle part;intracellular part;membrane;membrane part;membrane-bounded organelle;mitochondrion;myelin sheath adaxonal region;neuron projection;neuron spine;nuclear body;nuclear part;nucleoplasm;…
34.2907	33.2832	34.8765	33.8689	37	37	37	69.4	69.4	69.4	67.568	0	323.31	63317000000	196	0.303272	0.865384	-0.585732	-0.72093	-	-	O08599	O08599	Syntaxin-binding protein 1	Stxbp1	Stxbp1	axon target recognition;biological adhesion;biological regulation;cell adhesion;cell communication;cell-cell adhesion;cell-cell signaling;cellular component organization;cellular component organization at cellular level;cellular component organization or biogenesis;cellular component organization or biogenesis at cellular level;cellular localization;cellular macromolecule localization;cellular me…	binding;protein binding;SNARE binding;syntaxin binding;syntaxin-1 binding	cell part;cytoplasm;cytoplasmic membrane-bounded vesicle;cytoplasmic part;cytoplasmic vesicle;cytosol;extracellular membrane-bounded organelle;extracellular organelle;extracellular region part;extracellular vesicular exosome;intracellular membrane-bounded organelle;intracellular organelle;intracellular organelle part;intracellular part;macromolecular complex;membrane;membrane-bounded organelle;me…
NaN	NaN	27.9299	30.3878	9	9	9	34.7	34.7	34.7	32.19	0	24.701	1141900000	14	0	0.986685	NaN	0	-	-	O08600	O08600	Endonuclease G, mitochondrial	Endog	Endog	biological regulation;catabolic process;cellular catabolic process;cellular macromolecule catabolic process;cellular macromolecule metabolic process;cellular metabolic process;cellular nitrogen compound metabolic process;cellular process;chordate embryonic development;developmental process;DNA catabolic process;DNA catabolic process, endonucleolytic;DNA fragmentation involved in apoptotic nuclear…	binding;catalytic activity;cation binding;endonuclease activity;hydrolase activity;hydrolase activity, acting on ester bonds;ion binding;metal ion binding;nuclease activity;nucleic acid binding	cell part;cytoplasmic part;intracellular membrane-bounded organelle;intracellular organelle;intracellular part;membrane-bounded organelle;mitochondrion;organelle	+
28.2448	28.5215	28.1164	27.492	4	4	4	18	18	18	47.914	0	36.108	924130000	7	0.634326	0.668492	0.57894	1.31133	-	-	O08605	O08605	MAP kinase-interacting serine/threonine-protein kinase 1	Mknk1	Mknk1	biological regulation;cellular macromolecule metabolic process;cellular metabolic process;cellular process;cellular protein metabolic process;cellular response to stimulus;intracellular signal transduction;macromolecule metabolic process;macromolecule modification;metabolic process;peptidyl-amino acid modification;peptidyl-serine modification;peptidyl-serine phosphorylation;phosphate-containing c…	adenyl nucleotide binding;adenyl ribonucleotide binding;ATP binding;binding;calcium-dependent protein kinase activity;calcium-dependent protein serine/threonine kinase activity;calmodulin binding;calmodulin-dependent protein kinase activity;catalytic activity;kinase activity;nucleotide binding;phosphotransferase activity, alcohol group as acceptor;protein binding;protein kinase activity;protein s…	cell part;cytoplasm;intracellular membrane-bounded organelle;intracellular organelle;intracellular part;membrane-bounded organelle;nucleus;organelle
37.2802	33.0465	32.1744	31.4945	168	149	140	64.1	59.9	56.2	227.03	0	323.31	161200000000	459	0.583856	0.662813	3.32888	1.48347	-	-	O08638	O08638	Myosin-11	Myh11	Myh11	actin cytoskeleton organization;actin filament-based process;anatomical structure development;anatomical structure formation involved in morphogenesis;cardiac muscle fiber development;cell development;cellular component assembly;cellular component assembly at cellular level;cellular component assembly involved in morphogenesis;cellular component organization;cellular component organization at cel…	adenyl nucleotide binding;adenyl ribonucleotide binding;ATP binding;binding;catalytic activity;hydrolase activity;hydrolase activity, acting on acid anhydrides;hydrolase activity, acting on acid anhydrides, in phosphorus-containing anhydrides;motor activity;nucleoside-triphosphatase activity;nucleotide binding;purine nucleotide binding;purine ribonucleoside triphosphate binding;purine ribonucleot…	actin filament bundle;actomyosin;brush border;cell part;cell projection;contractile fiber;contractile fiber part;cytoplasmic membrane-bounded vesicle;cytoplasmic part;cytoplasmic vesicle;cytoskeletal part;extracellular membrane-bounded organelle;extracellular organelle;extracellular region part;extracellular vesicular exosome;intracellular membrane-bounded organelle;intracellular non-membrane-bou…
26.4868	27.2848	NaN	NaN	4	4	4	3.4	3.4	3.4	179.83	0	11.235	200910000	8	0	0.986232	NaN	0	-	-	O08648	O08648	Mitogen-activated protein kinase kinase kinase 4	Map3k4	Map3k4	activation of MAPK activity;activation of MAPKK activity;activation of protein kinase activity;anatomical structure development;biological regulation;cell differentiation;cellular developmental process;cellular macromolecule metabolic process;cellular metabolic process;cellular process;cellular protein metabolic process;cellular response to stimulus;chorionic trophoblast cell differentiation;dete…	adenyl nucleotide binding;adenyl ribonucleotide binding;ATP binding;binding;catalytic activity;cation binding;ion binding;kinase activity;MAP kinase kinase activity;MAP kinase kinase kinase activity;metal ion binding;molecular transducer activity;nucleotide binding;phosphotransferase activity, alcohol group as acceptor;protein kinase activity;protein serine/threonine kinase activity;protein serin…	cell part;cytoplasm;cytoplasmic part;intracellular part;perinuclear region of cytoplasm
30.8312	30.6752	30.8608	30.3505	14	14	14	33.3	33.3	33.3	52.921	0	127.58	5506200000	60	0.196643	0.958504	0.147537	0.402206	-	-	O08663	O08663	Methionine aminopeptidase 2	Metap2	Metap2	cellular macromolecule metabolic process;cellular metabolic process;cellular process;cellular protein metabolic process;macromolecule metabolic process;macromolecule modification;metabolic process;N-terminal protein amino acid modification;peptidyl-amino acid modification;peptidyl-methionine modification;primary metabolic process;protein initiator methionine removal;protein maturation;protein met…	aminopeptidase activity;binding;catalytic activity;cation binding;exopeptidase activity;hydrolase activity;ion binding;metal ion binding;metalloaminopeptidase activity;metalloexopeptidase activity;metallopeptidase activity;peptidase activity;peptidase activity, acting on L-amino acid peptides	cell part;cytoplasm;intracellular part;membrane;plasma membrane
36.3716	35.9465	35.9328	35.3422	30	30	30	36.8	36.8	36.8	73.101	0	323.31	213720000000	244	0.540386	0.687033	0.521544	1.12437	-	-	O08677;CON__P01045-1;CON__Q2KJ62;CON__P01044-1	O08677	Kininogen-1;Kininogen-1 heavy chain;Bradykinin;Kininogen-1 light chain	Kng1	Kng1	biological regulation;blood coagulation;circulatory system process;coagulation;defense response;hemostasis;inflammatory response;multicellular organismal process;negative regulation of catalytic activity;negative regulation of endopeptidase activity;negative regulation of hydrolase activity;negative regulation of molecular function;negative regulation of peptidase activity;regulation of anatomica…	binding;cysteine-type endopeptidase inhibitor activity;endopeptidase inhibitor activity;endopeptidase regulator activity;enzyme inhibitor activity;enzyme regulator activity;peptidase inhibitor activity;peptidase regulator activity;protein binding;receptor binding	blood microparticle;extracellular membrane-bounded organelle;extracellular organelle;extracellular region part;extracellular space;extracellular vesicular exosome;membrane-bounded organelle;membrane-bounded vesicle;organelle;vesicle
29.0037	27.6937	29.0598	28.0411	10	10	10	21.4	21.4	21.4	72.954	0	37.624	1381300000	19	0.0806353	0.980807	-0.201756	-0.217004	-	-	O08688	O08688	Calpain-5	Capn5	Capn5	macromolecule metabolic process;metabolic process;primary metabolic process;protein metabolic process;proteolysis	calcium-dependent cysteine-type endopeptidase activity;catalytic activity;cysteine-type endopeptidase activity;cysteine-type peptidase activity;endopeptidase activity;hydrolase activity;peptidase activity;peptidase activity, acting on L-amino acid peptides	adherens junction;anchoring junction;cell junction;cell part;cell surface;cell-substrate adherens junction;cell-substrate junction;cytoplasm;extracellular membrane-bounded organelle;extracellular organelle;extracellular region part;extracellular vesicular exosome;focal adhesion;intracellular part;membrane-bounded organelle;membrane-bounded vesicle;organelle;vesicle
35.0892	34.8011	35.4454	35.2576	38	38	38	98.2	98.2	98.2	24.87	0	323.31	123040000000	269	0.848025	0.657535	-0.406332	-1.49426	-	-	O08709	O08709	Peroxiredoxin-6	Prdx6	Prdx6	bleb assembly;catabolic process;cell projection assembly;cell projection organization;cellular catabolic process;cellular component assembly;cellular component assembly at cellular level;cellular component organization;cellular component organization at cellular level;cellular component organization or biogenesis;cellular component organization or biogenesis at cellular level;cellular lipid catab…	antioxidant activity;carboxylic ester hydrolase activity;catalytic activity;glutathione peroxidase activity;hydrolase activity;hydrolase activity, acting on ester bonds;lipase activity;oxidoreductase activity;oxidoreductase activity, acting on paired donors, with incorporation or reduction of molecular oxygen;oxidoreductase activity, acting on peroxide as acceptor;peroxidase activity;peroxiredoxi…	cell part;cytoplasm;cytoplasmic membrane-bounded vesicle;cytoplasmic part;cytoplasmic vesicle;cytosol;extracellular membrane-bounded organelle;extracellular organelle;extracellular region part;extracellular space;extracellular vesicular exosome;intracellular membrane-bounded organelle;intracellular organelle;intracellular part;lysosome;lytic vacuole;membrane;membrane-bounded organelle;membrane-bo…	+
25.9643	26.9439	NaN	NaN	4	4	4	15.9	15.9	15.9	31.595	0	4.8514	158440000	6	0	0.98578	NaN	0	-	-	O08738	O08738	Caspase-6;Caspase-6 subunit p18;Caspase-6 subunit p11	Casp6	Casp6	cell differentiation;cellular developmental process;cellular process;developmental process;epithelial cell differentiation;macromolecule metabolic process;metabolic process;primary metabolic process;protein metabolic process;proteolysis	binding;catalytic activity;endopeptidase activity;hydrolase activity;identical protein binding;peptidase activity;peptidase activity, acting on L-amino acid peptides;protein binding	cell part;cytoplasm;cytoplasmic part;cytosol;intracellular organelle part;intracellular part;nuclear part;nucleoplasm;organelle part
28.7176	28.3284	29.0503	27.8055	9	8	8	13.6	12.7	12.7	88.651	0	30.999	1245000000	16	0.0469919	0.986855	0.0950794	0.126417	-	-	O08739	O08739	AMP deaminase 3	Ampd3	Ampd3	ADP metabolic process;AMP metabolic process;ATP metabolic process;biological regulation;biosynthetic process;cellular biosynthetic process;cellular metabolic compound salvage;cellular metabolic process;cellular nitrogen compound biosynthetic process;cellular nitrogen compound metabolic process;cellular process;energy homeostasis;erythrocyte homeostasis;GTP metabolic process;heterocycle biosynthet…	AMP deaminase activity;binding;catalytic activity;cation binding;deaminase activity;hydrolase activity;hydrolase activity, acting on carbon-nitrogen (but not peptide) bonds;hydrolase activity, acting on carbon-nitrogen (but not peptide) bonds, in cyclic amidines;ion binding;metal ion binding	-
28.4926	29.5886	27.4271	NaN	7	7	7	10.7	10.7	10.7	106.75	0	64.527	1054400000	13	0	0.985328	1.6135	0	-	-	O08746	O08746	Matrilin-2	Matn2	Matn2	anatomical structure morphogenesis;axon guidance;cell migration;cell motility;cell part morphogenesis;cell projection morphogenesis;cell projection organization;cellular component morphogenesis;cellular component movement;cellular component organization;cellular component organization at cellular level;cellular component organization or biogenesis;cellular component organization or biogenesis at …	binding;calcium ion binding;cation binding;ion binding;metal ion binding	basement membrane;extracellular matrix;extracellular matrix part;extracellular region part;proteinaceous extracellular matrix
33.9835	33.2987	34.1964	35.5842	35	35	35	58.2	58.2	58.2	54.272	0	323.31	71367000000	198	0.605921	0.650664	-1.24919	-1.42967	-	-	O08749	O08749	Dihydrolipoyl dehydrogenase, mitochondrial	Dld	Dld	anatomical structure morphogenesis;biological regulation;cell maturation;cell redox homeostasis;cellular chemical homeostasis;cellular developmental process;cellular homeostasis;cellular ion homeostasis;cellular metabolic process;cellular process;cellular process involved in reproduction;chemical homeostasis;developmental maturation;developmental process;developmental process involved in reproduc…	binding;catalytic activity;coenzyme binding;cofactor binding;dihydrolipoyl dehydrogenase activity;flavin adenine dinucleotide binding;oxidoreductase activity;oxidoreductase activity, acting on a sulfur group of donors;oxidoreductase activity, acting on a sulfur group of donors, NAD or NADP as acceptor;oxidoreductase activity, acting on NADH or NADPH	acrosomal matrix;cell part;cell projection;cilium;cytoplasmic part;cytoplasmic vesicle part;intracellular membrane-bounded organelle;intracellular organelle;intracellular organelle lumen;intracellular organelle part;intracellular part;membrane-bounded organelle;membrane-enclosed lumen;mitochondrial matrix;mitochondrial part;mitochondrion;myelin sheath;nuclear part;nucleoplasm;organelle;organelle …	+
32.4704	31.6486	33.1224	33.1541	12	12	12	64	64	64	27.418	0	320.89	20521000000	93	0.921703	0.712021	-1.07873	-2.1102	-	-	O08756	O08756	3-hydroxyacyl-CoA dehydrogenase type-2	Hsd17b10	Hsd17b10	cellular macromolecule metabolic process;cellular metabolic process;cellular nitrogen compound metabolic process;cellular process;macromolecule metabolic process;metabolic process;ncRNA metabolic process;ncRNA processing;nitrogen compound metabolic process;nucleic acid metabolic process;nucleobase-containing compound metabolic process;primary metabolic process;RNA metabolic process;RNA processing…	3-hydroxy-2-methylbutyryl-CoA dehydrogenase activity;3-hydroxyacyl-CoA dehydrogenase activity;catalytic activity;oxidoreductase activity;oxidoreductase activity, acting on CH-OH group of donors;oxidoreductase activity, acting on the CH-OH group of donors, NAD or NADP as acceptor;steroid dehydrogenase activity;steroid dehydrogenase activity, acting on the CH-OH group of donors, NAD or NADP as acce…	cell part;cytoplasmic part;endoplasmic reticulum;intracellular membrane-bounded organelle;intracellular organelle;intracellular organelle part;intracellular part;membrane;membrane-bounded organelle;mitochondrial inner membrane;mitochondrial membrane;mitochondrial part;mitochondrion;organelle;organelle inner membrane;organelle membrane;organelle part	+
28.8607	28.4684	28.9045	29.1596	15	15	15	21.7	21.7	21.7	99.818	0	39.565	1463400000	25	0.59036	0.691231	-0.367484	-1.10042	-	-	O08759	O08759	Ubiquitin-protein ligase E3A	Ube3a	Ube3a	androgen receptor signaling pathway;biological regulation;catabolic process;cellular catabolic process;cellular component organization;cellular component organization or biogenesis;cellular macromolecule catabolic process;cellular macromolecule metabolic process;cellular membrane organization;cellular metabolic process;cellular process;cellular process involved in reproduction;cellular protein me…	acid-amino acid ligase activity;binding;catalytic activity;cation binding;ion binding;ligase activity;ligase activity, forming carbon-nitrogen bonds;metal ion binding;protein binding transcription factor activity;small conjugating protein ligase activity;transcription coactivator activity;transcription cofactor activity;transcription factor binding transcription factor activity;ubiquitin-protein …	cell part;cytoplasmic part;cytosol;intracellular membrane-bounded organelle;intracellular organelle;intracellular part;macromolecular complex;membrane-bounded organelle;nucleus;organelle;proteasome complex;protein complex
34.3891	33.9719	34.2522	32.8681	62	62	62	53.4	53.4	53.4	141.67	0	323.31	57521000000	274	0.317664	0.858	0.620319	0.7539	-	-	O08788	O08788	Dynactin subunit 1	Dctn1	Dctn1	biological regulation;cellular component movement;cellular component organization;cellular component organization at cellular level;cellular component organization or biogenesis;cellular component organization or biogenesis at cellular level;cellular process;cytoplasmic microtubule organization;cytoskeleton organization;cytoskeleton-dependent intracellular transport;endosome transport;establishme…	catalytic activity;hydrolase activity;hydrolase activity, acting on acid anhydrides;hydrolase activity, acting on acid anhydrides, in phosphorus-containing anhydrides;motor activity;nucleoside-triphosphatase activity;pyrophosphatase activity	cell leading edge;cell part;centrosome;chromosomal part;cytoplasm;cytoplasmic part;cytoskeletal part;dynactin complex;dynein complex;intracellular non-membrane-bounded organelle;intracellular organelle;intracellular organelle part;intracellular part;kinetochore;macromolecular complex;membrane;membrane part;microtubule;microtubule associated complex;microtubule organizing center;non-membrane-bound…
32.3515	33.1662	32.5351	31.8454	17	17	17	25.5	25.5	25.5	58.792	0	145.39	19761000000	78	0.399799	0.802228	0.568626	0.897276	-	-	O08795	O08795	Glucosidase 2 subunit beta	Prkcsh	Prkcsh	anatomical structure development;biological regulation;carbohydrate metabolic process;cellular component assembly;cellular component organization;cellular component organization or biogenesis;chordate embryonic development;developmental process;embryo development;embryo development ending in birth or egg hatching;in utero embryonic development;liver development;macromolecular complex assembly;mac…	binding;calcium ion binding;cation binding;enzyme binding;ion binding;ion channel binding;kinase binding;metal ion binding;nucleic acid binding;phosphoprotein binding;protein binding;protein kinase binding;protein kinase C binding;RNA binding	cell part;cytoplasmic part;endoplasmic reticulum;intracellular membrane-bounded organelle;intracellular organelle;intracellular part;membrane-bounded organelle;organelle
28.7264	28.7603	NaN	NaN	8	8	8	21.7	21.7	21.7	42.15	0	17.158	859030000	8	0	0.984876	NaN	0	-	-	O08800	O08800	Serpin B8	Serpinb8	Serpinb8	biological regulation;negative regulation of catalytic activity;negative regulation of endopeptidase activity;negative regulation of hydrolase activity;negative regulation of molecular function;negative regulation of peptidase activity;regulation of biological process;regulation of catalytic activity;regulation of endopeptidase activity;regulation of hydrolase activity;regulation of metabolic pro…	endopeptidase inhibitor activity;endopeptidase regulator activity;enzyme inhibitor activity;enzyme regulator activity;peptidase inhibitor activity;peptidase regulator activity;serine-type endopeptidase inhibitor activity	cell part;cytoplasm;cytoplasmic part;cytosol;extracellular membrane-bounded organelle;extracellular organelle;extracellular region part;extracellular space;extracellular vesicular exosome;intracellular part;membrane-bounded organelle;membrane-bounded vesicle;organelle;vesicle
34.6671	35.1246	34.5574	34.3156	11	10	10	51.1	51.1	51.1	31.052	0	55.039	81636000000	70	0.661857	0.665272	0.459332	1.28041	-	-	O08807	O08807	Peroxiredoxin-4	Prdx4	Prdx4	4-hydroxyproline metabolic process;amine metabolic process;anatomical structure development;biological regulation;carboxylic acid metabolic process;cell redox homeostasis;cellular amine metabolic process;cellular amino acid metabolic process;cellular component organization;cellular component organization at cellular level;cellular component organization or biogenesis;cellular component organizati…	antioxidant activity;binding;catalytic activity;identical protein binding;oxidoreductase activity;oxidoreductase activity, acting on paired donors, with incorporation or reduction of molecular oxygen;oxidoreductase activity, acting on peroxide as acceptor;peroxidase activity;peroxiredoxin activity;protein binding;protein dimerization activity;protein homodimerization activity	cell part;cytoplasm;cytoplasmic part;cytosol;endoplasmic reticulum;extracellular membrane-bounded organelle;extracellular organelle;extracellular region part;extracellular space;extracellular vesicular exosome;intracellular membrane-bounded organelle;intracellular organelle;intracellular part;membrane-bounded organelle;membrane-bounded vesicle;mitochondrion;nucleus;organelle;smooth endoplasmic re…	+
28.325	28.9356	NaN	28.8497	11	11	11	10.9	10.9	10.9	139.34	0	51.25	1093600000	18	0	0.984425	-0.219359	0	-	-	O08808	O08808	Protein diaphanous homolog 1	Diaph1	Diaph1	actin cytoskeleton organization;actin filament organization;actin filament polymerization;actin filament-based process;actin polymerization or depolymerization;biological regulation;cell projection organization;cellular component assembly;cellular component assembly at cellular level;cellular component organization;cellular component organization at cellular level;cellular component organization …	actin binding;binding;cytoskeletal protein binding;enzyme binding;GTPase binding;identical protein binding;ion channel binding;profilin binding;protein binding;Ras GTPase binding;Rho GTPase binding;small GTPase binding	brush border;cell part;cell projection;cell projection membrane;cell projection part;cytoplasm;cytoskeletal part;intracellular non-membrane-bounded organelle;intracellular organelle;intracellular organelle part;intracellular part;leading edge membrane;membrane part;mitotic spindle;neuron projection;non-membrane-bounded organelle;organelle;organelle part;plasma membrane part;ruffle membrane;spindle
26.4398	26.798	27.1114	NaN	6	4	4	6.9	5.8	5.8	109.36	0	5.9493	306740000	5	0	0.983974	-0.492476	0	-	-	O08810	O08810	116 kDa U5 small nuclear ribonucleoprotein component	Eftud2	Eftud2	cellular macromolecule metabolic process;cellular metabolic process;cellular nitrogen compound metabolic process;cellular process;macromolecule metabolic process;metabolic process;mRNA metabolic process;mRNA processing;nitrogen compound metabolic process;nucleic acid metabolic process;nucleobase-containing compound metabolic process;primary metabolic process;RNA metabolic process;RNA processing;R…	binding;catalytic activity;GTP binding;GTPase activity;guanyl nucleotide binding;guanyl ribonucleotide binding;hydrolase activity;hydrolase activity, acting on acid anhydrides;hydrolase activity, acting on acid anhydrides, in phosphorus-containing anhydrides;nucleoside-triphosphatase activity;nucleotide binding;purine nucleotide binding;purine ribonucleoside triphosphate binding;purine ribonucleo…	Cajal body;catalytic step 2 spliceosome;cell part;cytoplasm;intracellular membrane-bounded organelle;intracellular organelle;intracellular organelle part;intracellular part;macromolecular complex;membrane;membrane-bounded organelle;nuclear body;nuclear part;nuclear speck;nucleoplasm;nucleoplasm part;nucleus;organelle;organelle part;ribonucleoprotein complex;spliceosomal complex
29.344	28.2467	29.4972	28.2445	8	8	8	20.6	20.6	20.6	60.123	0	54.09	1678600000	19	0.0286904	0.994204	-0.0754337	-0.0808789	-	-	O08848	O08848	60 kDa SS-A/Ro ribonucleoprotein	Trove2	Trove2	anatomical structure development;anatomical structure morphogenesis;biological regulation;cell part morphogenesis;cell projection morphogenesis;cell projection organization;cell surface receptor linked signaling pathway;cellular component morphogenesis;cellular component organization;cellular component organization at cellular level;cellular component organization or biogenesis;cellular component…	binding;cation binding;ion binding;metal ion binding;misfolded RNA binding;nucleic acid binding;RNA binding;snRNA binding;U2 snRNA binding	cell part;cytoplasm;intracellular membrane-bounded organelle;intracellular organelle;intracellular organelle part;intracellular part;macromolecular complex;membrane-bounded organelle;nuclear part;nucleoplasm;nucleus;organelle;organelle part;ribonucleoprotein complex
25.9762	NaN	26.2696	31.6334	11	11	11	43.9	43.9	43.9	42.043	0	115.19	2110600000	24	0	0.983524	-2.9753	0	-	-	O08911	O08911	Mitogen-activated protein kinase 12	Mapk12	Mapk12	biological regulation;biosynthetic process;cell cycle;cell differentiation;cellular biosynthetic process;cellular developmental process;cellular macromolecule biosynthetic process;cellular macromolecule metabolic process;cellular metabolic process;cellular nitrogen compound metabolic process;cellular process;cellular protein metabolic process;developmental process;macromolecule biosynthetic proce…	adenyl nucleotide binding;adenyl ribonucleotide binding;ATP binding;binding;catalytic activity;cation binding;ion binding;kinase activity;magnesium ion binding;MAP kinase activity;metal ion binding;molecular transducer activity;nucleotide binding;phosphotransferase activity, alcohol group as acceptor;protein kinase activity;protein serine/threonine kinase activity;purine nucleotide binding;purine…	cell part;cytoplasm;cytoplasmic part;intracellular membrane-bounded organelle;intracellular organelle;intracellular organelle part;intracellular part;membrane-bounded organelle;mitochondrion;nuclear part;nucleoplasm;organelle;organelle part
32.4203	32.6962	32.2633	31.962	17	17	17	52.1	52.1	52.1	37.605	0	234.42	17724000000	74	0.793507	0.654008	0.445637	1.46464	-	-	O08915	O08915	AH receptor-interacting protein	Aip	Aip	biological regulation;cellular macromolecule metabolic process;cellular metabolic process;cellular process;cellular protein metabolic process;establishment of localization;establishment of localization in cell;establishment of protein localization;establishment of protein localization in mitochondrion;establishment of protein localization to organelle;intracellular protein transport;intracellular…	aryl hydrocarbon receptor binding;binding;GAF domain binding;protein binding;protein binding transcription factor activity;protein domain specific binding;receptor binding;transcription cofactor activity;transcription factor binding;transcription factor binding transcription factor activity;unfolded protein binding	aryl hydrocarbon receptor complex;cell part;cytoplasm;cytoplasmic part;cytosol;intracellular organelle part;intracellular part;macromolecular complex;membrane;nuclear part;nucleoplasm;organelle part;plasma membrane;protein complex;receptor complex
31.0178	30.326	30.9577	30.0079	20	20	20	56.8	56.8	56.8	47.513	0	240.02	5453200000	53	0.108988	0.970603	0.189136	0.275083	-	-	O08917	O08917	Flotillin-1	Flot1	Flot1	anatomical structure morphogenesis;axon guidance;axonogenesis;biological regulation;cell part morphogenesis;cell projection morphogenesis;cell projection organization;cellular component disassembly;cellular component disassembly at cellular level;cellular component morphogenesis;cellular component organization;cellular component organization at cellular level;cellular component organization or bi…	binding;enzyme binding;protease binding;protein binding	adherens junction;anchoring junction;caveola;cell junction;cell part;cell-substrate adherens junction;cell-substrate junction;centriolar satellite;cytoplasmic membrane-bounded vesicle;cytoplasmic part;cytoplasmic vesicle;cytoskeletal part;endosome;extracellular membrane-bounded organelle;extracellular organelle;extracellular region part;extracellular vesicular exosome;flotillin complex;focal adhe…
29.1921	28.9446	27.3004	NaN	3	3	3	5.3	5.3	5.3	64.13	0	5.2156	1210600000	8	0	0.983074	1.76796	0	-	-	O08919	O08919	Numb-like protein	Numbl	Numbl	adherens junction organization;anatomical structure development;anatomical structure morphogenesis;axonogenesis;biological regulation;cell division;cell junction organization;cell part morphogenesis;cell projection morphogenesis;cell projection organization;cell proliferation;cell surface receptor linked signaling pathway;cell-cell junction organization;cellular component morphogenesis;cellular c…	-	cell part;cytoplasm;intracellular part
27.8157	27.9008	27.8339	NaN	5	5	4	16	16	13.3	46.279	0	9.2508	619330000	12	0	0.982625	0.0243607	0	-	-	O08967	O08967	Cytohesin-3	Cyth3	Cyth3	biological regulation;cellular process;establishment of cell polarity;establishment of epithelial cell polarity;establishment of localization;establishment of localization in cell;establishment or maintenance of cell polarity;Golgi vesicle transport;intracellular transport;positive regulation of biological process;positive regulation of catalytic activity;positive regulation of cell adhesion;posi…	ARF guanyl-nucleotide exchange factor activity;binding;enzyme regulator activity;GTPase regulator activity;guanyl-nucleotide exchange factor activity;lipid binding;nucleoside-triphosphatase regulator activity;phosphatidylinositol binding;phosphatidylinositol-3,4,5-trisphosphate binding;phospholipid binding;small GTPase regulator activity	cell part;cell projection;cytoplasm;cytoplasmic part;cytosol;extrinsic to internal side of plasma membrane;extrinsic to membrane;extrinsic to plasma membrane;intracellular part;membrane;membrane part;plasma membrane;plasma membrane part;ruffle
30.3965	29.9183	30.1615	30.5538	10	10	10	40.8	40.8	40.8	32.379	0	145.82	4127200000	41	0.23377	0.931177	-0.200242	-0.489235	-	-	O08992	O08992	Syntenin-1	Sdcbp	Sdcbp	actin cytoskeleton organization;actin filament-based process;biological regulation;cell communication;cell-cell signaling;cellular component organization;cellular component organization at cellular level;cellular component organization or biogenesis;cellular component organization or biogenesis at cellular level;cellular process;cellular response to stimulus;cytoskeleton organization;intracellula…	binding;cytokine receptor binding;frizzled binding;G-protein-coupled receptor binding;growth factor receptor binding;identical protein binding;interleukin-5 receptor binding;protein binding;protein dimerization activity;protein heterodimerization activity;protein N-terminus binding;receptor binding;syndecan binding	blood microparticle;cell part;cytoplasm;cytoplasmic membrane-bounded vesicle;cytoplasmic part;cytoplasmic vesicle;extracellular membrane-bounded organelle;extracellular organelle;extracellular region part;extracellular space;extracellular vesicular exosome;interleukin-5 receptor complex;intracellular membrane-bounded organelle;intracellular organelle;intracellular part;macromolecular complex;mela…
33.2753	33.1715	33.6027	33.1808	7	7	7	69.1	69.1	69.1	7.3384	0	196.72	34188000000	69	0.284453	0.926994	-0.168346	-0.530661	-	-	O08997	O08997	Copper transport protein ATOX1	Atox1	Atox1	biological regulation;cation homeostasis;cation transport;cellular cation homeostasis;cellular chemical homeostasis;cellular copper ion homeostasis;cellular homeostasis;cellular ion homeostasis;cellular process;chemical homeostasis;copper ion homeostasis;copper ion transport;establishment of localization;establishment of localization in cell;homeostatic process;intracellular copper ion transport;…	binding;cation binding;cation transmembrane transporter activity;copper chaperone activity;copper ion binding;copper ion transmembrane transporter activity;copper-dependent protein binding;inorganic cation transmembrane transporter activity;ion binding;ion transmembrane transporter activity;metal ion binding;metal ion transmembrane transporter activity;metallochaperone activity;protein binding;su…	cell part;cytoplasmic part;cytosol;intracellular part
27.3934	28.2145	27.8361	NaN	6	6	6	14.7	14.7	14.7	70.755	0	20.058	650280000	9	0	0.982176	-0.0321665	0	-	-	O09012	O09012	Peroxisomal targeting signal 1 receptor	Pex5	Pex5	anatomical structure development;biological regulation;carboxylic acid catabolic process;carboxylic acid metabolic process;catabolic process;cell development;cell differentiation;cell migration;cell motility;cellular catabolic process;cellular component assembly;cellular component assembly at cellular level;cellular component movement;cellular component organization;cellular component organizatio…	binding;enzyme binding;GTPase binding;peptide binding;peroxisome matrix targeting signal-1 binding;peroxisome targeting sequence binding;protein binding;protein C-terminus binding;protein N-terminus binding;signal sequence binding;small GTPase binding	cell part;cytoplasm;cytoplasmic part;cytosol;Golgi apparatus;intracellular;intracellular membrane-bounded organelle;intracellular organelle;intracellular organelle lumen;intracellular organelle part;intracellular part;macromolecular complex;membrane;membrane-bounded organelle;membrane-enclosed lumen;microbody;microbody lumen;microbody membrane;microbody part;mitochondrion;organelle;organelle lume…
29.1306	29.7201	29.4469	29.3811	6	6	6	50	50	50	23.261	0	56.925	2131400000	24	0.0118916	0.99954	0.0113316	0.0285756	-	-	O09044	O09044	Synaptosomal-associated protein 23	Snap23	Snap23	amine transport;biological regulation;cellular component assembly;cellular component assembly at cellular level;cellular component organization;cellular component organization at cellular level;cellular component organization or biogenesis;cellular component organization or biogenesis at cellular level;cellular macromolecular complex assembly;cellular macromolecular complex subunit organization;c…	binding;protein binding;SNAP receptor activity;SNARE binding;syntaxin binding	adherens junction;anchoring junction;azurophil granule;cell junction;cell part;cell projection;cell-substrate adherens junction;cell-substrate junction;cytoplasm;cytoplasmic membrane-bounded vesicle;cytoplasmic part;cytoplasmic vesicle;extracellular membrane-bounded organelle;extracellular organelle;extracellular region part;extracellular vesicular exosome;focal adhesion;intracellular membrane-bo…
32.8919	33.4497	33.1093	33.1265	14	14	14	48.8	48.8	48.8	26.372	0	323.31	34112000000	125	0.0619342	0.984903	0.0529175	0.139609	-	-	O09061	O09061	Proteasome subunit beta type-1	Psmb1	Psmb1	catabolic process;cellular catabolic process;cellular macromolecule catabolic process;cellular macromolecule metabolic process;cellular metabolic process;cellular process;macromolecule catabolic process;macromolecule metabolic process;metabolic process;modification-dependent macromolecule catabolic process;modification-dependent protein catabolic process;primary metabolic process;proteasomal prot…	catalytic activity;endopeptidase activity;hydrolase activity;peptidase activity;peptidase activity, acting on L-amino acid peptides;threonine-type endopeptidase activity;threonine-type peptidase activity	cell part;cytoplasm;cytoplasmic part;cytosol;extracellular membrane-bounded organelle;extracellular organelle;extracellular region part;extracellular vesicular exosome;intracellular membrane-bounded organelle;intracellular organelle;intracellular part;macromolecular complex;membrane-bounded organelle;membrane-bounded vesicle;nucleus;organelle;proteasome complex;proteasome core complex;protein com…
28.2376	NaN	28.2099	27.7127	5	5	3	15.6	15.6	11.4	55.074	0	12.87	993800000	12	0	0.981727	0.276279	0	-	-	O09106;O88895	O09106	Histone deacetylase 1	Hdac1	Hdac1	anatomical structure development;anatomical structure formation involved in morphogenesis;anatomical structure morphogenesis;ATP-dependent chromatin remodeling;biological regulation;biosynthetic process;cell differentiation;cellular biosynthetic process;cellular component assembly;cellular component assembly at cellular level;cellular component organization;cellular component organization at cell…	activating transcription factor binding;binding;catalytic activity;chromatin binding;chromatin DNA binding;core promoter binding;cyclin binding;deacetylase activity;DNA binding;enzyme binding;histone deacetylase activity;histone deacetylase activity (H3-K14 specific);histone deacetylase activity (H3-K9 specific);histone deacetylase binding;hydrolase activity;hydrolase activity, acting on carbon-n…	cell body;cell part;chromatin;chromatin remodeling complex;chromosomal part;cytoplasm;cytoplasmic part;cytoskeletal part;cytosol;Golgi apparatus;heterochromatin;histone deacetylase complex;intracellular membrane-bounded organelle;intracellular organelle;intracellular organelle part;intracellular part;macromolecular complex;membrane;membrane-bounded organelle;microtubule;neuronal cell body;nuclear…
31.9937	31.9758	32.176	31.8863	16	16	16	49.6	49.6	49.6	27.497	0	67.56	14301000000	92	0.108131	0.987226	-0.0463781	-0.189196	-	-	O09131;Q8K2Q2	O09131	Glutathione S-transferase omega-1	Gsto1	Gsto1	biological regulation;carboxylic acid metabolic process;catabolic process;cellular catabolic process;cellular ketone metabolic process;cellular metabolic process;cellular process;cellular response to arsenic-containing substance;cellular response to chemical stimulus;cellular response to inorganic substance;cellular response to stimulus;L-ascorbic acid metabolic process;metabolic process;negative…	antioxidant activity;catalytic activity;disulfide oxidoreductase activity;glutathione dehydrogenase (ascorbate) activity;glutathione disulfide oxidoreductase activity;glutathione transferase activity;methylarsonate reductase activity;oxidoreductase activity;oxidoreductase activity, acting on a sulfur group of donors;oxidoreductase activity, acting on a sulfur group of donors, quinone or similar c…	cell part;cytoplasm;cytoplasmic part;cytosol;extracellular membrane-bounded organelle;extracellular organelle;extracellular region part;extracellular vesicular exosome;intracellular part;membrane-bounded organelle;membrane-bounded vesicle;organelle;vesicle	+
31.5488	31.2558	30.8468	31.571	12	12	12	15	15	15	114.65	0	36.25	8605600000	37	0.17417	0.958056	0.193374	0.394128	-	-	O09159	O09159	Lysosomal alpha-mannosidase	Man2b1	Man2b1	alcohol metabolic process;behavior;carbohydrate metabolic process;cellular carbohydrate metabolic process;cellular macromolecule metabolic process;cellular metabolic process;cellular process;cellular protein metabolic process;cognition;hexose metabolic process;learning or memory;macromolecule metabolic process;macromolecule modification;mannose metabolic process;metabolic process;monosaccharide m…	alpha-mannosidase activity;binding;carbohydrate binding;catalytic activity;cation binding;hydrolase activity;hydrolase activity, acting on glycosyl bonds;hydrolase activity, hydrolyzing O-glycosyl compounds;ion binding;mannose binding;mannosidase activity;metal ion binding;monosaccharide binding;sugar binding;transition metal ion binding;zinc ion binding	cell part;cytoplasmic part;extracellular membrane-bounded organelle;extracellular organelle;extracellular region part;extracellular vesicular exosome;intracellular membrane-bounded organelle;intracellular organelle;intracellular part;lysosome;lytic vacuole;membrane-bounded organelle;membrane-bounded vesicle;organelle;vacuole;vesicle
32.9419	31.894	33.0878	31.2774	13	13	13	67.3	67.3	67.3	27.392	0	323.31	20321000000	62	0.0742355	0.980808	0.235338	0.205365	-	-	O09164	O09164	Extracellular superoxide dismutase [Cu-Zn]	Sod3	Sod3	cellular metabolic process;cellular process;cellular response to chemical stimulus;cellular response to oxidative stress;cellular response to oxygen radical;cellular response to reactive oxygen species;cellular response to stimulus;cellular response to stress;cellular response to superoxide;metabolic process;reactive oxygen species metabolic process;removal of superoxide radicals;response to chem…	antioxidant activity;binding;catalytic activity;cation binding;copper ion binding;ion binding;metal ion binding;oxidoreductase activity;oxidoreductase activity, acting on superoxide radicals as acceptor;superoxide dismutase activity;transition metal ion binding;zinc ion binding	cell part;cytoplasm;cytoplasmic part;extracellular matrix;extracellular membrane-bounded organelle;extracellular organelle;extracellular region part;extracellular space;extracellular vesicular exosome;Golgi apparatus part;Golgi lumen;intracellular membrane-bounded organelle;intracellular organelle;intracellular organelle lumen;intracellular organelle part;intracellular part;membrane-bounded organ…
28.2857	NaN	29.2495	35.7068	20	20	20	53.6	53.6	53.6	46.377	0	323.31	42052000000	97	0	0.981279	-4.19244	0	-	-	O09165	O09165	Calsequestrin-1	Casq1	Casq1	actin cytoskeleton organization;actin filament-based process;actomyosin structure organization;anatomical structure development;biological regulation;calcium-mediated signaling;cellular component assembly;cellular component assembly at cellular level;cellular component organization;cellular component organization at cellular level;cellular component organization or biogenesis;cellular component o…	binding;calcium ion binding;cation binding;ion binding;metal ion binding	cell part;contractile fiber part;cytoplasmic part;endoplasmic reticulum;endoplasmic reticulum lumen;endoplasmic reticulum membrane;endoplasmic reticulum part;Golgi apparatus;I band;intracellular membrane-bounded organelle;intracellular organelle;intracellular organelle lumen;intracellular organelle part;intracellular part;membrane;membrane part;membrane-bounded organelle;membrane-enclosed lumen;m…
30.071	31.0977	29.0259	30.1743	8	8	8	47.5	47.5	47.5	18.562	0	22.956	4584300000	37	0.482079	0.683343	0.98426	1.13107	-	-	O09167	O09167	60S ribosomal protein L21	Rpl21	Rpl21	biosynthetic process;cellular biosynthetic process;cellular macromolecule biosynthetic process;cellular macromolecule metabolic process;cellular metabolic process;cellular process;cellular protein metabolic process;macromolecule biosynthetic process;macromolecule metabolic process;metabolic process;primary metabolic process;protein metabolic process;translation	structural constituent of ribosome;structural molecule activity	cell part;cytoplasm;cytosolic large ribosomal subunit;intracellular non-membrane-bounded organelle;intracellular organelle;intracellular organelle part;intracellular part;large ribosomal subunit;macromolecular complex;membrane;non-membrane-bounded organelle;nuclear part;nucleolus;organelle;organelle part;ribonucleoprotein complex
32.4656	32.0454	33.1329	31.6059	8	8	8	32.1	32.1	32.1	30.534	0	84.689	18915000000	63	0.0463474	0.987114	-0.113944	-0.127755	-	-	O09172	O09172	Glutamate--cysteine ligase regulatory subunit	Gclm	Gclm	amine biosynthetic process;amine metabolic process;apoptotic mitochondrial changes;biological regulation;biosynthetic process;carboxylic acid biosynthetic process;carboxylic acid metabolic process;cellular amine metabolic process;cellular amino acid biosynthetic process;cellular amino acid metabolic process;cellular biosynthetic process;cellular component organization;cellular component organizat…	acid-amino acid ligase activity;binding;catalytic activity;enzyme binding;enzyme regulator activity;glutamate-cysteine ligase activity;glutamate-cysteine ligase catalytic subunit binding;ligase activity;ligase activity, forming carbon-nitrogen bonds;protein binding;protein dimerization activity;protein heterodimerization activity	cell part;cytoplasmic part;glutamate-cysteine ligase complex;intracellular part;macromolecular complex;protein complex
27.8293	28.1446	27.792	NaN	12	7	7	18.5	13.2	13.2	89.972	0	35.452	635050000	11	0	0.980831	0.194924	0	-	-	O35066	O35066	Kinesin-like protein KIF3C	Kif3c	Kif3c	cellular component movement;cellular process;cytoskeleton-dependent intracellular transport;establishment of localization;establishment of localization in cell;intracellular transport;metabolic process;microtubule-based movement;microtubule-based process;microtubule-based transport;organelle transport along microtubule;transport	adenyl nucleotide binding;adenyl ribonucleotide binding;ATP binding;ATPase activity;binding;catalytic activity;hydrolase activity;hydrolase activity, acting on acid anhydrides;hydrolase activity, acting on acid anhydrides, in phosphorus-containing anhydrides;microtubule motor activity;motor activity;nucleoside-triphosphatase activity;nucleotide binding;purine nucleotide binding;purine ribonucleos…	cell body;cell part;cell projection part;cytoplasmic part;cytoskeletal part;cytosol;intracellular non-membrane-bounded organelle;intracellular organelle;intracellular organelle part;intracellular part;kinesin complex;macromolecular complex;microtubule;microtubule associated complex;neuronal cell body;neuronal RNA granule;non-membrane-bounded organelle;organelle;organelle part;protein complex;ribo…
32.4108	32.9995	33.324	32.2814	29	23	23	66.8	60	60	61.961	0	279.22	28520000000	133	0.0528132	0.985411	-0.0975838	-0.139673	-	-	O35098	O35098	Dihydropyrimidinase-related protein 4	Dpysl4	Dpysl4	cell death;cellular process;death;neuron death	binding;catalytic activity;hydrolase activity;hydrolase activity, acting on carbon-nitrogen (but not peptide) bonds;phosphoprotein binding;protein binding	cell part;cytoplasm;intracellular part
28.7768	30.3782	NaN	28.3259	5	5	5	18.2	18.2	18.2	54.043	0	44.411	1859200000	14	0	0.980383	1.25164	0	-	-	O35114	O35114	Lysosome membrane protein 2	Scarb2	Scarb2	biological adhesion;cell adhesion;cellular process;establishment of localization;establishment of localization in cell;establishment of protein localization;establishment of protein localization to organelle;establishment of protein localization to vacuole;intracellular protein transport;intracellular transport;lysosomal transport;protein targeting;protein targeting to lysosome;protein targeting …	binding;enzyme binding;protein binding;receptor activity	adherens junction;anchoring junction;cell junction;cell part;cell-substrate adherens junction;cell-substrate junction;cytoplasmic part;extracellular membrane-bounded organelle;extracellular organelle;extracellular region part;extracellular vesicular exosome;focal adhesion;integral to membrane;intracellular organelle lumen;intracellular organelle part;intracellular part;intrinsic to membrane;lysos…
28.0173	27.9693	28.9638	28.5846	4	4	4	53.2	53.2	53.2	13.194	0	58.229	1054500000	12	1.25962	0.894667	-0.780874	-2.68239	-	-	O35127	O35127	Protein C10	Grcc10	Grcc10	-	-	cell part;cytoplasm;intracellular part
29.9342	29.3465	30.639	31.2634	19	19	19	68.6	68.6	68.6	33.296	0	96.112	4290200000	42	1.03435	0.79793	-1.31085	-2.47911	-	-	O35129	O35129	Prohibitin-2	Phb2	Phb2	anatomical structure development;anatomical structure morphogenesis;biological regulation;biosynthetic process;branching involved in mammary gland duct morphogenesis;branching morphogenesis of a tube;cellular biosynthetic process;cellular macromolecule biosynthetic process;cellular macromolecule metabolic process;cellular metabolic process;cellular nitrogen compound metabolic process;cellular pro…	-	cell part;cell surface;cytoplasmic part;extracellular membrane-bounded organelle;extracellular organelle;extracellular region part;extracellular vesicular exosome;intracellular membrane-bounded organelle;intracellular organelle;intracellular organelle part;intracellular part;macromolecular complex;membrane;membrane-bounded organelle;membrane-bounded vesicle;mitochondrial inner membrane;mitochondr…	+
31.3741	31.0933	31.5911	31.1469	7	7	7	41.5	41.5	41.5	12.159	0	55.403	9025800000	23	0.181812	0.957514	-0.135274	-0.372889	-	-	O35143	O35143	ATPase inhibitor, mitochondrial	Atpif1	Atpif1	biological regulation;biosynthetic process;cell differentiation;cellular biosynthetic process;cellular chemical homeostasis;cellular component assembly;cellular component organization;cellular component organization or biogenesis;cellular developmental process;cellular homeostasis;cellular ion homeostasis;cellular metabolic process;cellular nitrogen compound biosynthetic process;cellular nitrogen…	angiostatin binding;ATPase binding;ATPase inhibitor activity;ATPase regulator activity;binding;calmodulin binding;enzyme binding;enzyme inhibitor activity;enzyme regulator activity;identical protein binding;nucleoside-triphosphatase regulator activity;protein binding;protein dimerization activity;protein homodimerization activity	cell part;cell surface;cytoplasmic part;intracellular membrane-bounded organelle;intracellular organelle;intracellular organelle part;intracellular part;macromolecular complex;membrane part;membrane-bounded organelle;mitochondrial membrane part;mitochondrial part;mitochondrial proton-transporting ATP synthase complex;mitochondrion;organelle;organelle part;protein complex;proton-transporting ATP s…	+
34.1312	33.8358	35.2821	34.1869	25	25	25	19.5	19.5	19.5	140.47	0	323.31	78446000000	187	0.499591	0.686633	-0.751015	-1.12566	-	-	O35206	O35206	Collagen alpha-1(XV) chain;Restin	Col15a1	Col15a1	biological adhesion;cell adhesion;cellular process	structural molecule activity	basement membrane;collagen;extracellular matrix part;extracellular membrane-bounded organelle;extracellular organelle;extracellular region part;extracellular space;extracellular vesicular exosome;membrane-bounded organelle;membrane-bounded vesicle;organelle;vesicle
33.6289	32.9922	33.7651	33.8104	13	13	13	99.2	99.2	99.2	13.077	0	323.31	41518000000	115	0.56307	0.683104	-0.4772	-1.1385	-	-	O35215	O35215	D-dopachrome decarboxylase	Ddt	Ddt	biosynthetic process;cellular biosynthetic process;cellular metabolic process;cellular process;melanin biosynthetic process;melanin metabolic process;metabolic process;pigment biosynthetic process;pigment metabolic process;secondary metabolic process	carbon-carbon lyase activity;carboxy-lyase activity;catalytic activity;D-dopachrome decarboxylase activity;lyase activity	cell part;cytoplasm;extracellular membrane-bounded organelle;extracellular organelle;extracellular region part;extracellular vesicular exosome;intracellular part;membrane-bounded organelle;membrane-bounded vesicle;organelle;vesicle
31.4923	31.8572	31.1484	31.1488	11	11	11	37	37	37	40.703	0	70.399	9101600000	33	0.99078	0.654145	0.526134	1.86283	-	-	O35226	O35226	26S proteasome non-ATPase regulatory subunit 4	Psmd4	Psmd4	catabolic process;cellular catabolic process;cellular macromolecule catabolic process;cellular macromolecule metabolic process;cellular metabolic process;cellular process;macromolecule catabolic process;macromolecule metabolic process;metabolic process;modification-dependent macromolecule catabolic process;modification-dependent protein catabolic process;primary metabolic process;protein metaboli…	binding;identical protein binding;protein binding	cell part;cytoplasm;intracellular organelle part;intracellular part;macromolecular complex;nuclear part;nucleoplasm;organelle part;proteasome accessory complex;proteasome complex;proteasome regulatory particle, base subcomplex;protein complex
28.5844	28.3496	28.8808	NaN	11	11	11	25	25	25	79.959	0	35.284	1119300000	15	0	0.979936	-0.413857	0	-	-	O35250	O35250	Exocyst complex component 7	Exoc7	Exoc7	cellular process;establishment of localization;establishment of localization in cell;establishment of protein localization;exocytosis;protein transport;secretion;secretion by cell;transport;vesicle-mediated transport	-	cell cortex part;cell part;cell projection part;centriolar satellite;cytoplasmic part;cytoskeletal part;cytosol;exocyst;growth cone membrane;intracellular organelle part;intracellular part;macromolecular complex;membrane;membrane part;microtubule organizing center;microtubule organizing center part;organelle part;plasma membrane;plasma membrane part;protein complex
30.2477	30.5828	30.4167	29.794	18	18	17	28.2	28.2	27	91.006	0	52.03	4414100000	50	0.324986	0.875719	0.309904	0.683296	-	-	O35286	O35286	Pre-mRNA-splicing factor ATP-dependent RNA helicase DHX15	Dhx15	Dhx15	cellular macromolecule metabolic process;cellular metabolic process;cellular nitrogen compound metabolic process;cellular process;macromolecule metabolic process;metabolic process;mRNA metabolic process;mRNA processing;nitrogen compound metabolic process;nuclear mRNA splicing, via spliceosome;nucleic acid metabolic process;nucleobase-containing compound metabolic process;primary metabolic process…	adenyl nucleotide binding;adenyl ribonucleotide binding;ATP binding;ATPase activity;ATPase activity, coupled;ATP-dependent helicase activity;ATP-dependent RNA helicase activity;binding;catalytic activity;double-stranded RNA binding;helicase activity;hydrolase activity;hydrolase activity, acting on acid anhydrides;hydrolase activity, acting on acid anhydrides, in phosphorus-containing anhydrides;n…	cell part;cytoplasm;intracellular membrane-bounded organelle;intracellular non-membrane-bounded organelle;intracellular organelle;intracellular organelle part;intracellular part;macromolecular complex;membrane-bounded organelle;non-membrane-bounded organelle;nuclear part;nucleolus;nucleoplasm;nucleus;organelle;organelle part;post-mRNA release spliceosomal complex;ribonucleoprotein complex;spliceo…
32.1407	32.0854	32.0618	30.6601	18	15	15	71.9	66	66	33.901	0	323.31	12738000000	75	0.402515	0.774065	0.752111	0.938501	-	-	O35295;Q8R4E6	O35295	Transcriptional activator protein Pur-beta	Purb	Purb	apoptosis;biological regulation;cell death;cell differentiation;cell proliferation;cellular developmental process;cellular macromolecule metabolic process;cellular metabolic process;cellular nitrogen compound metabolic process;cellular process;death;developmental process;DNA conformation change;DNA duplex unwinding;DNA geometric change;DNA metabolic process;DNA unwinding involved in replication;m…	binding;DNA binding;double-stranded DNA binding;double-stranded telomeric DNA binding;mRNA binding;nucleic acid binding;nucleic acid binding transcription factor activity;protein binding;regulatory region DNA binding;regulatory region nucleic acid binding;RNA binding;RNA polymerase II regulatory region DNA binding;RNA polymerase II regulatory region sequence-specific DNA binding;sequence-specific…	cell part;chromosomal part;DNA replication factor A complex;intracellular membrane-bounded organelle;intracellular organelle;intracellular organelle part;intracellular part;macromolecular complex;membrane-bounded organelle;nuclear chromosome part;nuclear part;nucleoplasm;nucleus;organelle;organelle part;protein complex
30.4054	30.8418	NaN	NaN	8	7	7	32.3	29	29	30.891	0	16.994	2984100000	19	0	0.97949	NaN	0	-	-	O35326	O35326	Serine/arginine-rich splicing factor 5	Srsf5	Srsf5	biological regulation;biosynthetic process;cellular biosynthetic process;cellular macromolecule biosynthetic process;cellular macromolecule metabolic process;cellular metabolic process;cellular nitrogen compound metabolic process;cellular process;macromolecule biosynthetic process;macromolecule metabolic process;metabolic process;mRNA metabolic process;mRNA processing;nitrogen compound metabolic …	binding;nucleotide binding;protein binding;protein domain specific binding;RS domain binding	cell part;cytoplasm;intracellular non-membrane-bounded organelle;intracellular organelle;intracellular organelle part;intracellular part;non-membrane-bounded organelle;nuclear body;nuclear part;nuclear speck;nucleolus;nucleoplasm part;organelle;organelle part
31.3333	32.2321	31.6308	32.0436	16	16	9	26.1	26.1	15.7	57.922	0	39.081	13218000000	56	0.035123	0.993089	-0.0544987	-0.091667	-	-	O35343	O35343	Importin subunit alpha-3	Kpna4	Kpna4	establishment of localization;establishment of localization in cell;establishment of protein localization;intracellular protein transport;intracellular transport;nuclear import;nuclear transport;nucleocytoplasmic transport;protein import;protein import into nucleus;protein targeting;protein transport;response to chemical stimulus;response to hydrogen peroxide;response to inorganic substance;respo…	protein transporter activity;substrate-specific transporter activity;transporter activity	cell part;cytoplasm;extracellular membrane-bounded organelle;extracellular organelle;extracellular region part;extracellular vesicular exosome;intracellular membrane-bounded organelle;intracellular organelle;intracellular part;membrane-bounded organelle;membrane-bounded vesicle;nucleus;organelle;vesicle
30.47	31.7082	29.2628	30.4186	12	5	5	17.5	7.1	7.1	57.772	0	9.6169	5391000000	16	0.555359	0.666135	1.24844	1.31844	-	-	O35344	O35344	Importin subunit alpha-4	Kpna3	Kpna3	establishment of localization;establishment of localization in cell;establishment of protein localization;intracellular protein transport;intracellular transport;nuclear import;nuclear transport;nucleocytoplasmic transport;protein import;protein import into nucleus;protein targeting;protein transport;transport	binding;protein binding;protein C-terminus binding;protein transporter activity;substrate-specific transporter activity;transporter activity	cell part;cytoplasm;intracellular membrane-bounded organelle;intracellular organelle;intracellular part;membrane-bounded organelle;nucleus;organelle
34.1229	34.162	34.2886	34.3135	41	41	41	49.2	49.2	49.2	82.105	0	323.31	63488000000	217	1.68375	0.665152	-0.158632	-1.28768	-	-	O35350	O35350	Calpain-1 catalytic subunit	Capn1	Capn1	catabolic process;cellular catabolic process;cellular macromolecule metabolic process;cellular metabolic process;cellular process;macromolecule catabolic process;macromolecule metabolic process;mammary gland involution;metabolic process;multicellular organismal process;primary metabolic process;protein metabolic process;proteolysis;receptor catabolic process;receptor metabolic process;tissue remo…	binding;calcium ion binding;calcium-dependent cysteine-type endopeptidase activity;catalytic activity;cation binding;cysteine-type endopeptidase activity;cysteine-type peptidase activity;endopeptidase activity;hydrolase activity;ion binding;metal ion binding;peptidase activity;peptidase activity, acting on L-amino acid peptides	adherens junction;anchoring junction;cell junction;cell part;cell-substrate adherens junction;cell-substrate junction;cytoplasm;cytoplasmic part;cytosol;extracellular membrane-bounded organelle;extracellular organelle;extracellular region part;extracellular vesicular exosome;focal adhesion;intracellular membrane-bounded organelle;intracellular organelle;intracellular part;lysosome;lytic vacuole;m…
NaN	NaN	29.38	33.2138	15	15	15	36.5	36.5	36.5	40.403	0	81.004	7130600000	26	0	0.979043	NaN	0	-	-	O35367	O35367	Keratocan	Kera	Kera	anatomical structure development;cornea development in camera-type eye;developmental process	-	extracellular matrix;extracellular region part;proteinaceous extracellular matrix
32.8897	32.8776	32.4836	32.0592	18	18	15	47	47	46.2	28.537	0	169.11	20123000000	75	0.990906	0.657218	0.612255	1.96069	-	-	O35381;Q64G17	O35381;Q64G17	Acidic leucine-rich nuclear phosphoprotein 32 family member A;Putative acidic leucine-rich nuclear phosphoprotein 32 family member C	Anp32a;Anp32c	Anp32a	biological regulation;biosynthetic process;cellular biosynthetic process;cellular macromolecule biosynthetic process;cellular macromolecule metabolic process;cellular metabolic process;cellular nitrogen compound metabolic process;cellular process;macromolecule biosynthetic process;macromolecule metabolic process;metabolic process;nitrogen compound metabolic process;nucleic acid metabolic process;…	-	cell part;cytoplasm;cytoplasmic part;endoplasmic reticulum;intracellular membrane-bounded organelle;intracellular organelle;intracellular organelle part;intracellular part;membrane-bounded organelle;nuclear matrix;nuclear part;nucleus;organelle;organelle part;perinuclear region of cytoplasm
28.6196	29.1231	NaN	NaN	8	8	8	10.7	10.7	10.7	110.54	0	19.758	978500000	16	0	0.978597	NaN	0	-	-	O35382	O35382	Exocyst complex component 4	Exoc4	Exoc4	cellular process;establishment of localization;establishment of protein localization;membrane docking;protein transport;transport;vesicle docking;vesicle docking involved in exocytosis	binding;enzyme binding;GTPase binding;PDZ domain binding;protein binding;protein domain specific binding;protein N-terminus binding;Ral GTPase binding;Ras GTPase binding;small GTPase binding	cell cortex part;cell part;cell projection part;cytoplasm;cytoplasmic part;exocyst;growth cone membrane;intracellular part;macromolecular complex;membrane;membrane part;myelin sheath abaxonal region;plasma membrane;plasma membrane part;protein complex
31.5574	32.2784	31.4177	31.9211	17	17	17	52.6	52.6	52.6	36.118	0	214.37	11669000000	73	0.2014	0.941923	0.248475	0.46041	-	-	O35459	O35459	Delta(3,5)-Delta(2,4)-dienoyl-CoA isomerase, mitochondrial	Ech1	Ech1	carboxylic acid catabolic process;carboxylic acid metabolic process;catabolic process;cellular catabolic process;cellular ketone metabolic process;cellular lipid catabolic process;cellular lipid metabolic process;cellular metabolic process;cellular process;fatty acid beta-oxidation;fatty acid catabolic process;fatty acid metabolic process;fatty acid oxidation;lipid catabolic process;lipid metabol…	binding;catalytic activity;isomerase activity;protein binding;receptor binding	cell part;cytoplasmic part;extracellular membrane-bounded organelle;extracellular organelle;extracellular region part;extracellular vesicular exosome;intracellular membrane-bounded organelle;intracellular organelle;intracellular part;membrane;membrane-bounded organelle;membrane-bounded vesicle;microbody;mitochondrion;organelle;peroxisome;vesicle	+
28.4874	27.9924	27.7772	29.9181	4	4	4	25.1	25.1	25.1	23.396	0	9.4551	1166700000	9	0.196732	0.927153	-0.607759	-0.507025	-	-	P28076;O35522	P28076;O35522	Proteasome subunit beta type-9	Psmb9	Psmb9	antigen processing and presentation;catabolic process;cellular catabolic process;cellular macromolecule catabolic process;cellular macromolecule metabolic process;cellular metabolic process;cellular process;immune system process;macromolecule catabolic process;macromolecule metabolic process;metabolic process;modification-dependent macromolecule catabolic process;modification-dependent protein ca…	catalytic activity;endopeptidase activity;hydrolase activity;peptidase activity;peptidase activity, acting on L-amino acid peptides;threonine-type endopeptidase activity;threonine-type peptidase activity	cell part;cytoplasm;cytoplasmic part;cytosol;extracellular membrane-bounded organelle;extracellular organelle;extracellular region part;extracellular vesicular exosome;intracellular membrane-bounded organelle;intracellular organelle;intracellular part;macromolecular complex;membrane-bounded organelle;membrane-bounded vesicle;nucleus;organelle;proteasome core complex;protein complex;vesicle
32.0117	32.0911	31.7237	29.6724	36	36	36	43.5	43.5	43.5	99.523	0	191.02	11025000000	88	0.497442	0.671512	1.35331	1.20139	-	-	O35551	O35551	Rab GTPase-binding effector protein 1	Rabep1	Rabep1	apoptosis;cell death;cellular component organization;cellular component organization or biogenesis;cellular membrane organization;cellular process;death;endocytosis;establishment of localization;establishment of protein localization;membrane invagination;membrane organization;programmed cell death;protein transport;transport;vesicle-mediated transport	binding;enzyme activator activity;enzyme regulator activity;GTPase activator activity;GTPase regulator activity;identical protein binding;nucleoside-triphosphatase regulator activity;protein binding;protein dimerization activity;protein homodimerization activity	cell part;cytoplasmic membrane-bounded vesicle;cytoplasmic part;cytoplasmic vesicle;early endosome;endocytic vesicle;endosome;intracellular membrane-bounded organelle;intracellular organelle;intracellular part;membrane-bounded organelle;membrane-bounded vesicle;organelle;recycling endosome;vesicle
29.3599	NaN	29.3408	28.9599	3	3	3	12.6	12.6	12.6	28.246	0	30.075	1180700000	9	0	0.978152	0.209551	0	-	-	O35566	O35566	CD151 antigen	Cd151	Cd151	cell activation;cell migration;cell motility;cell proliferation;cellular component movement;cellular process;immune system process;leukocyte activation;leukocyte proliferation;locomotion;lymphocyte activation;lymphocyte proliferation;mononuclear cell proliferation;T cell activation;T cell proliferation	binding;integrin binding;protein binding;protein complex binding;receptor binding	adherens junction;anchoring junction;basement membrane;cell junction;cell part;cell-substrate adherens junction;cell-substrate junction;extracellular matrix part;extracellular region part;focal adhesion;integral to membrane;intrinsic to membrane;membrane part
30.9341	31.617	30.7131	30.8395	14	14	14	55.2	55.2	55.2	34.577	0	99.437	6985800000	52	0.541991	0.689387	0.499237	1.11627	-	-	O35593	O35593	26S proteasome non-ATPase regulatory subunit 14	Psmd14	Psmd14	biological regulation;cellular macromolecule metabolic process;cellular metabolic process;cellular nitrogen compound metabolic process;cellular process;cellular protein metabolic process;cellular response to stimulus;cellular response to stress;DNA metabolic process;DNA recombination;DNA repair;double-strand break repair;double-strand break repair via homologous recombination;double-strand break …	binding;catalytic activity;cation binding;endopeptidase activator activity;endopeptidase activity;endopeptidase regulator activity;enzyme activator activity;enzyme regulator activity;hydrolase activity;ion binding;metal ion binding;metallopeptidase activity;peptidase activator activity;peptidase activity;peptidase activity, acting on L-amino acid peptides;peptidase regulator activity;proteasome b…	cell part;extracellular membrane-bounded organelle;extracellular organelle;extracellular region part;extracellular vesicular exosome;intracellular membrane-bounded organelle;intracellular organelle;intracellular part;macromolecular complex;membrane-bounded organelle;membrane-bounded vesicle;nucleus;organelle;proteasome accessory complex;proteasome complex;proteasome regulatory particle, lid subco…
28.2704	27.6382	28.6367	29.0741	8	8	8	14.3	14.3	14.3	83.967	0	28.619	1135600000	15	0.842354	0.648257	-0.901067	-1.86016	-	-	O35598	O35598	Disintegrin and metalloproteinase domain-containing protein 10	Adam10	Adam10	biological regulation;cell activation;cell surface receptor linked signaling pathway;cellular macromolecule metabolic process;cellular metabolic process;cellular process;cellular protein metabolic process;cellular response to stimulus;chordate embryonic development;constitutive protein ectodomain proteolysis;developmental process;embryo development;embryo development ending in birth or egg hatchi…	binding;catalytic activity;cation binding;endopeptidase activity;enzyme binding;hydrolase activity;identical protein binding;ion binding;kinase binding;metal ion binding;metalloendopeptidase activity;metallopeptidase activity;peptidase activity;peptidase activity, acting on L-amino acid peptides;protein binding;protein dimerization activity;protein domain specific binding;protein homodimerization…	adherens junction;anchoring junction;cell junction;cell part;cell surface;cell-substrate adherens junction;cell-substrate junction;cytoplasm;cytoplasmic membrane-bounded vesicle;cytoplasmic part;cytoplasmic vesicle;cytoskeletal part;endoplasmic reticulum part;extracellular membrane-bounded organelle;extracellular organelle;extracellular region part;extracellular vesicular exosome;focal adhesion;G…
27.0832	29.8475	NaN	NaN	10	10	10	17.5	17.5	17.5	90.054	0	49.476	944650000	10	0	0.977707	NaN	0	-	-	O35601	O35601	FYN-binding protein	Fyb	Fyb	cellular component organization;cellular component organization or biogenesis;cellular localization;cellular macromolecule localization;cellular membrane organization;cellular process;cellular protein localization;immune response;immune system process;localization;macromolecule localization;membrane organization;plasma membrane organization;protein localization;protein localization in membrane;pr…	-	actin cytoskeleton;cell part;cytoplasmic part;cytoskeleton;cytosol;intracellular membrane-bounded organelle;intracellular non-membrane-bounded organelle;intracellular organelle;intracellular part;membrane;membrane-bounded organelle;non-membrane-bounded organelle;nucleus;organelle;plasma membrane
31.7988	31.7328	32.4572	30.7905	14	14	12	51.9	51.9	45	29.774	0	92.709	12162000000	71	0.0552521	0.98529	0.141922	0.151946	-	-	O35621	O35621	Phosphomannomutase 1	Pmm1	Pmm1	alcohol biosynthetic process;alcohol metabolic process;biosynthetic process;carbohydrate biosynthetic process;carbohydrate metabolic process;cellular biosynthetic process;cellular carbohydrate biosynthetic process;cellular carbohydrate metabolic process;cellular metabolic process;cellular nitrogen compound metabolic process;cellular process;GDP-mannose biosynthetic process;GDP-mannose metabolic p…	binding;catalytic activity;cation binding;intramolecular transferase activity;intramolecular transferase activity, phosphotransferases;ion binding;isomerase activity;metal ion binding;phosphomannomutase activity	cell body;cell part;cytoplasm;intracellular part;neuronal cell body
35.6387	35.6616	35.6552	34.4732	41	41	41	64.1	64.1	64.1	36.384	0	323.31	154610000000	352	0.370563	0.818182	0.585943	0.847833	-	-	O35639	O35639	Annexin A3	Anxa3	Anxa3	biological regulation;cell activation;cell activation involved in immune response;cellular component organization;cellular component organization or biogenesis;cellular membrane organization;cellular process;defense response;defense response to bacterium;endocytosis;establishment of localization;establishment of localization in cell;exocytosis;immune effector process;immune system process;leukocy…	binding;calcium ion binding;calcium-dependent phospholipid binding;calcium-dependent protein binding;cation binding;enzyme inhibitor activity;enzyme regulator activity;ion binding;lipase inhibitor activity;lipid binding;metal ion binding;phospholipase A2 inhibitor activity;phospholipase inhibitor activity;phospholipid binding;protein binding	cell part;cytoplasm;cytoplasmic membrane-bounded vesicle;cytoplasmic part;cytoplasmic vesicle;cytoplasmic vesicle membrane;cytoplasmic vesicle part;endocytic vesicle membrane;extracellular membrane-bounded organelle;extracellular organelle;extracellular region part;extracellular vesicular exosome;intracellular membrane-bounded organelle;intracellular organelle;intracellular organelle part;intrace…
31.7742	31.9173	31.8598	31.4998	27	14	14	36.2	21	21	103.93	0	287.01	11387000000	48	0.317184	0.914149	0.165985	0.565186	-	-	O35643	O35643	AP-1 complex subunit beta-1	Ap1b1	Ap1b1	cellular process;establishment of localization;establishment of localization in cell;establishment of protein localization;intracellular protein transport;intracellular transport;protein transport;transport;vesicle-mediated transport	binding;enzyme binding;kinase binding;protein binding;protein kinase binding;protein transporter activity;substrate-specific transporter activity;transporter activity	AP-type membrane coat adaptor complex;cell part;clathrin adaptor complex;clathrin coated vesicle membrane;coated vesicle membrane;cytoplasmic part;cytoplasmic vesicle membrane;cytoplasmic vesicle part;Golgi apparatus part;intracellular organelle part;intracellular part;macromolecular complex;membrane;membrane part;organelle membrane;organelle part;protein complex;trans-Golgi network;vesicle membr…
28.4239	28.4334	27.7592	26.8051	3	3	3	5.3	5.3	5.3	56.578	0	17.24	898900000	11	0.859665	0.672549	1.14651	1.98683	-	-	O35664	O35664	Interferon alpha/beta receptor 2	Ifnar2	Ifnar2	biological regulation;cell proliferation;cell surface receptor linked signaling pathway;cellular process;cellular response to chemical stimulus;cellular response to cytokine stimulus;cellular response to organic substance;cellular response to stimulus;cellular response to type I interferon;cytokine-mediated signaling pathway;regulation of biological process;regulation of biosynthetic process;regu…	binding;cytokine binding;cytokine receptor activity;enzyme binding;interferon binding;interferon receptor activity;kinase binding;molecular transducer activity;protein binding;protein kinase binding;receptor activity;signal transducer activity;signaling receptor activity;transmembrane signaling receptor activity;type I interferon binding;type I interferon receptor activity	cell part;extracellular region part;extracellular space;integral to membrane;integral to plasma membrane;intrinsic to membrane;intrinsic to plasma membrane;membrane;membrane part;plasma membrane;plasma membrane part
29.4814	31.7518	27.5114	29.414	8	8	8	36	36	36	33.387	0	59.415	4297900000	28	0.548087	0.668077	2.15394	1.36232	-	-	O35678	O35678	Monoglyceride lipase	Mgll	Mgll	acylglycerol catabolic process;acylglycerol metabolic process;arachidonic acid metabolic process;biological regulation;biosynthetic process;carboxylic acid biosynthetic process;carboxylic acid metabolic process;catabolic process;cellular biosynthetic process;cellular catabolic process;cellular ketone metabolic process;cellular lipid catabolic process;cellular lipid metabolic process;cellular meta…	acylglycerol lipase activity;binding;carboxylic ester hydrolase activity;catalytic activity;hydrolase activity;hydrolase activity, acting on ester bonds;identical protein binding;lipase activity;protein binding;protein dimerization activity;protein homodimerization activity	axon;axon part;cell part;cell projection;cell projection part;cytoplasmic part;cytosol;extrinsic to membrane;intracellular organelle part;intracellular part;membrane part;neuron projection;nuclear part;nucleoplasm;organelle part;synapse;varicosity
32.5213	33.2514	32.5621	31.8386	19	19	19	53.6	53.6	53.6	38.358	0	211.32	21658000000	84	0.503607	0.690482	0.685996	1.11737	-	-	O35685	O35685	Nuclear migration protein nudC	Nudc	Nudc	cell cycle phase;cell cycle process;cell division;cellular component organization;cellular component organization at cellular level;cellular component organization or biogenesis;cellular component organization or biogenesis at cellular level;cellular process;mitosis;nuclear division;organelle fission;organelle organization	-	cell part;cytoplasm;cytoskeletal part;intracellular membrane-bounded organelle;intracellular organelle;intracellular organelle part;intracellular part;macromolecular complex;membrane-bounded organelle;microtubule;nucleus;organelle;organelle part;protein complex
28.7589	28.6285	NaN	NaN	6	5	5	10.4	9.2	9.2	98.752	0	20.475	756150000	8	0	0.977262	NaN	0	-	-	O35711	O35711	Liprin-beta-2	Ppfibp2	Ppfibp2	-	-	extracellular region part;extracellular space
32.6067	32.166	31.9828	30.3617	12	10	5	31.8	25.8	17.4	49.199	0	161.29	14047000000	50	0.544784	0.669405	1.21405	1.29156	-	-	O35737	O35737	Heterogeneous nuclear ribonucleoprotein H;Heterogeneous nuclear ribonucleoprotein H, N-terminally processed	Hnrnph1	Hnrnph1	biological regulation;cellular macromolecule metabolic process;cellular metabolic process;cellular nitrogen compound metabolic process;cellular process;macromolecule metabolic process;metabolic process;mRNA metabolic process;mRNA processing;nitrogen compound metabolic process;nucleic acid metabolic process;nucleobase-containing compound metabolic process;primary metabolic process;regulation of bi…	binding;nucleic acid binding;nucleotide binding;RNA binding	catalytic step 2 spliceosome;cell part;intracellular organelle part;intracellular part;macromolecular complex;membrane;nuclear part;nucleoplasm;organelle part;ribonucleoprotein complex;spliceosomal complex
29.9584	29.6583	29.4913	29.2317	11	11	11	28.6	28.6	28.6	56.784	0	73.006	2926600000	23	0.815135	0.656506	0.446858	1.4977	-	-	O35841	O35841	Apoptosis inhibitor 5	Api5	Api5	apoptosis;biological regulation;cell death;cellular process;death;negative regulation of apoptosis;negative regulation of biological process;negative regulation of cell death;negative regulation of cellular process;negative regulation of fibroblast apoptosis;negative regulation of programmed cell death;programmed cell death;regulation of apoptosis;regulation of biological process;regulation of ce…	binding;fibroblast growth factor binding;growth factor binding;protein binding	cell part;cytoplasm;intracellular membrane-bounded organelle;intracellular organelle;intracellular organelle part;intracellular part;macromolecular complex;membrane;membrane-bounded organelle;nuclear part;nucleoplasm;nucleus;organelle;organelle part;ribonucleoprotein complex;spliceosomal complex
31.887	30.8942	31.3614	33.002	12	12	12	34.9	34.9	34.9	44.127	0	123.65	13651000000	76	0.304489	0.861016	-0.791157	-0.747231	-	-	O35855	O35855	Branched-chain-amino-acid aminotransferase, mitochondrial	Bcat2	Bcat2	amine biosynthetic process;amine catabolic process;amine metabolic process;biological regulation;biosynthetic process;branched chain family amino acid biosynthetic process;branched chain family amino acid catabolic process;branched chain family amino acid metabolic process;carboxylic acid biosynthetic process;carboxylic acid catabolic process;carboxylic acid metabolic process;catabolic process;ce…	branched-chain-amino-acid transaminase activity;catalytic activity;L-isoleucine transaminase activity;L-leucine transaminase activity;L-valine transaminase activity;transaminase activity;transferase activity;transferase activity, transferring nitrogenous groups	cell part;cytoplasmic part;intracellular membrane-bounded organelle;intracellular organelle;intracellular part;membrane-bounded organelle;mitochondrion;organelle	+
30.8119	30.6632	30.6256	30.3541	13	13	13	38.9	38.9	38.9	37.548	0	132.54	5294000000	47	0.60102	0.76066	0.247757	0.972413	-	-	O35864	O35864	COP9 signalosome complex subunit 5	Cops5	Cops5	biological regulation;cellular macromolecule metabolic process;cellular metabolic process;cellular process;cellular protein metabolic process;cullin deneddylation;macromolecule metabolic process;macromolecule modification;metabolic process;positive regulation of biological process;positive regulation of biosynthetic process;positive regulation of cellular biosynthetic process;positive regulation …	binding;catalytic activity;cation binding;cysteine-type peptidase activity;hydrolase activity;ion binding;metal ion binding;metallopeptidase activity;peptidase activity;peptidase activity, acting on L-amino acid peptides;protein binding transcription factor activity;small conjugating protein-specific protease activity;transcription coactivator activity;transcription cofactor activity;transcriptio…	cell junction;cell part;clathrin-coated vesicle;coated vesicle;cytoplasm;cytoplasmic membrane-bounded vesicle;cytoplasmic part;cytoplasmic vesicle;intracellular membrane-bounded organelle;intracellular organelle;intracellular organelle part;intracellular part;macromolecular complex;membrane-bounded organelle;membrane-bounded vesicle;nuclear part;nucleoplasm;nucleoplasm part;nucleus;organelle;orga…
33.222	33.4692	32.9916	32.4546	17	17	17	52.7	52.7	52.7	37.063	0	323.31	29819000000	127	0.770085	0.672483	0.622471	1.5737	-	-	O35887	O35887	Calumenin	Calu	Calu	-	binding;calcium ion binding;cation binding;ion binding;metal ion binding	cell part;cytoplasmic membrane-bounded vesicle;cytoplasmic part;cytoplasmic vesicle;endoplasmic reticulum;endoplasmic reticulum lumen;endoplasmic reticulum part;extracellular region;intracellular membrane-bounded organelle;intracellular organelle;intracellular organelle lumen;intracellular organelle part;intracellular part;melanosome;membrane;membrane-bounded organelle;membrane-bounded vesicle;me…
28.6134	28.5493	28.7741	27.7572	4	4	4	49.5	49.5	49.5	10.834	0	27.777	1214100000	14	0.222825	0.929912	0.315711	0.518014	-	-	O35900	O35900	U6 snRNA-associated Sm-like protein LSm2	Lsm2	Lsm2	assembly of spliceosomal tri-snRNP;catabolic process;cellular catabolic process;cellular component assembly;cellular component assembly at cellular level;cellular component organization;cellular component organization at cellular level;cellular component organization or biogenesis;cellular component organization or biogenesis at cellular level;cellular macromolecular complex assembly;cellular mac…	binding;enzyme binding;GTPase binding;kinase binding;protein binding;protein kinase binding;Ral GTPase binding;Ras GTPase binding;small GTPase binding	catalytic step 2 spliceosome;cell part;cytoplasm;intracellular organelle part;intracellular part;macromolecular complex;nuclear part;nucleoplasm;organelle part;ribonucleoprotein complex;small nuclear ribonucleoprotein complex;spliceosomal complex;U4/U6 x U5 tri-snRNP complex
26.3187	26.2379	NaN	NaN	3	3	3	3	3	3	134.94	0	4.0988	149080000	6	0	0.976818	NaN	0	-	-	O35954	O35954	Membrane-associated phosphatidylinositol transfer protein 1	Pitpnm1	Pitpnm1	establishment of localization;establishment of protein localization;protein transport;transport	binding;cation binding;ion binding;lipid binding;metal ion binding;phospholipid binding	cell division site part;cell part;cleavage furrow;cytoplasm;cytoplasmic part;endoplasmic reticulum membrane;endoplasmic reticulum part;Golgi apparatus part;Golgi cisterna membrane;Golgi membrane;intracellular organelle part;intracellular part;lipid particle;membrane;membrane part;midbody;organelle membrane;organelle part
28.8836	29.3143	28.6133	29.3916	4	4	4	27.8	27.8	27.8	29.063	0	28.441	1791100000	16	0.0714629	0.982907	0.0965443	0.177232	-	-	O35955	O35955	Proteasome subunit beta type-10	Psmb10	Psmb10	anatomical structure morphogenesis;catabolic process;cell activation;cell morphogenesis;cell proliferation;cellular catabolic process;cellular component morphogenesis;cellular component organization;cellular component organization or biogenesis;cellular developmental process;cellular macromolecule catabolic process;cellular macromolecule metabolic process;cellular metabolic process;cellular proce…	catalytic activity;endopeptidase activity;hydrolase activity;peptidase activity;peptidase activity, acting on L-amino acid peptides;threonine-type endopeptidase activity;threonine-type peptidase activity	cell part;cytoplasm;cytoplasmic part;cytosol;intracellular membrane-bounded organelle;intracellular organelle;intracellular part;macromolecular complex;membrane-bounded organelle;nucleus;organelle;proteasome core complex;protein complex
32.3152	32.1933	32.7281	32.0724	10	10	10	46.2	46.2	46.2	26.336	0	78.48	18671000000	70	0.152219	0.96872	-0.14596	-0.336724	-	-	O35969	O35969	Guanidinoacetate N-methyltransferase	Gamt	Gamt	amine biosynthetic process;amine metabolic process;anatomical structure morphogenesis;biological regulation;biosynthetic process;carboxylic acid biosynthetic process;carboxylic acid metabolic process;cellular amine metabolic process;cellular amino acid biosynthetic process;cellular amino acid metabolic process;cellular biosynthetic process;cellular ketone metabolic process;cellular metabolic proc…	catalytic activity;guanidinoacetate N-methyltransferase activity;methyltransferase activity;S-adenosylmethionine-dependent methyltransferase activity;transferase activity;transferase activity, transferring one-carbon groups	cell part;cell projection;extracellular membrane-bounded organelle;extracellular organelle;extracellular region part;extracellular vesicular exosome;membrane-bounded organelle;membrane-bounded vesicle;microvillus;organelle;vesicle
35.1296	35.7201	34.4711	33.3836	35	35	35	66.6	66.6	66.6	43.953	0	323.31	106560000000	214	0.864557	0.699	1.49753	2.08349	-	-	O54724	O54724	Polymerase I and transcript release factor	Ptrf	Ptrf	biological regulation;biosynthetic process;cellular biosynthetic process;cellular macromolecule metabolic process;cellular metabolic process;cellular nitrogen compound metabolic process;cellular process;macromolecule metabolic process;metabolic process;nitrogen compound metabolic process;nucleic acid metabolic process;nucleobase-containing compound metabolic process;primary metabolic process;regu…	binding;nucleic acid binding;RNA binding;rRNA binding;rRNA primary transcript binding	caveola;cell part;cytoplasm;cytoplasmic part;cytosol;endoplasmic reticulum;intracellular membrane-bounded organelle;intracellular organelle;intracellular part;macromolecular complex;membrane;membrane part;membrane raft;membrane-bounded organelle;mitochondrion;nucleus;organelle;plasma membrane;plasma membrane part;protein complex
29.7175	30.3849	30.3633	29.0994	9	9	9	26.5	26.5	26.5	49.027	0	109.07	3535900000	36	0.155993	0.956549	0.319887	0.392668	-	-	O54734	O54734	Dolichyl-diphosphooligosaccharide--protein glycosyltransferase 48 kDa subunit	Ddost	Ddost	carbohydrate metabolic process;cell activation;cellular carbohydrate metabolic process;cellular macromolecule metabolic process;cellular metabolic process;cellular process;cellular protein metabolic process;glycosylation;immune system process;leukocyte activation;lymphocyte activation;macromolecule glycosylation;macromolecule metabolic process;macromolecule modification;metabolic process;peptidyl…	catalytic activity;dolichyl-diphosphooligosaccharide-protein glycotransferase activity;oligosaccharyl transferase activity;transferase activity;transferase activity, transferring glycosyl groups;transferase activity, transferring hexosyl groups	cell part;cytoplasmic part;endoplasmic reticulum;endoplasmic reticulum part;integral to membrane;intracellular membrane-bounded organelle;intracellular organelle;intracellular organelle part;intracellular part;intrinsic to membrane;macromolecular complex;membrane;membrane part;membrane-bounded organelle;oligosaccharyltransferase complex;organelle;organelle part;protein complex
26.9457	NaN	27.7532	27.7557	8	8	8	9.3	9.3	9.3	146.68	0	21.717	433720000	12	0	0.976374	-0.808756	0	-	-	O54754	O54754	Aldehyde oxidase 1	Aox1	Aox1	-	2 iron, 2 sulfur cluster binding;aldehyde oxidase activity;binding;catalytic activity;cation binding;coenzyme binding;cofactor binding;electron carrier activity;flavin adenine dinucleotide binding;ion binding;iron ion binding;iron-sulfur cluster binding;metal cluster binding;metal ion binding;molybdopterin cofactor binding;NAD binding;nucleotide binding;oxidoreductase activity;oxidoreductase acti…	cell part;cytoplasm;extracellular membrane-bounded organelle;extracellular organelle;extracellular region part;extracellular vesicular exosome;intracellular part;membrane-bounded organelle;membrane-bounded vesicle;organelle;vesicle
29.5501	29.3547	30.3224	27.6319	11	11	11	14.1	14.1	14.1	135.08	0	91.051	2506100000	30	0.120206	0.971976	0.475298	0.328064	-	-	O54774	O54774	AP-3 complex subunit delta-1	Ap3d1	Ap3d1	anterograde axon cargo transport;anterograde synaptic vesicle transport;antigen processing and presentation;antigen processing and presentation of exogenous antigen;antigen processing and presentation of lipid antigen via MHC class Ib;antigen processing and presentation via MHC class Ib;antigen processing and presentation, exogenous lipid antigen via MHC class Ib;axon cargo transport;biological r…	-	axon;axon part;cell part;cell projection;cell projection part;cytoplasmic part;endosomal part;endosome membrane;Golgi apparatus part;Golgi membrane;intracellular organelle part;intracellular part;lysosomal membrane;macromolecular complex;membrane;membrane coat;membrane part;neuron projection;nuclear part;nucleoplasm;organelle membrane;organelle part;protein complex;synapse part;terminal button;tr…
31.2175	30.1478	31.5222	31.3676	14	14	14	37.8	37.8	37.8	36.572	0	184.3	7584900000	52	0.531944	0.672905	-0.762266	-1.19031	-	-	O54786	O54786	DNA fragmentation factor subunit alpha	Dffa	Dffa	apoptosis;biological regulation;cell death;cellular process;death;leukocyte apoptosis;lymphocyte apoptosis;positive regulation of apoptosis;positive regulation of biological process;positive regulation of cell death;positive regulation of cellular process;positive regulation of programmed cell death;programmed cell death;regulation of apoptosis;regulation of biological process;regulation of cell …	-	cell part;chromatin;chromosomal part;cytoplasm;cytoplasmic part;cytosol;intracellular membrane-bounded organelle;intracellular organelle;intracellular organelle part;intracellular part;membrane-bounded organelle;nuclear chromatin;nuclear chromosome part;nuclear part;nucleoplasm;nucleus;organelle;organelle part
26.7456	26.9449	26.7632	NaN	4	4	4	14.9	14.9	14.9	41.215	0	6.9646	305740000	7	0	0.975931	0.0820694	0	-	-	O54833	O54833	Casein kinase II subunit alpha	Csnk2a2	Csnk2a2	apoptosis;biological regulation;biosynthetic process;cell cycle checkpoint;cell death;cell surface receptor linked signaling pathway;cellular biosynthetic process;cellular macromolecule biosynthetic process;cellular macromolecule metabolic process;cellular metabolic process;cellular nitrogen compound metabolic process;cellular process;cellular protein metabolic process;cellular response to stimul…	adenyl nucleotide binding;adenyl ribonucleotide binding;ATP binding;binding;catalytic activity;kinase activity;nucleotide binding;phosphotransferase activity, alcohol group as acceptor;protein binding;protein kinase activity;protein N-terminus binding;protein serine/threonine kinase activity;purine nucleotide binding;purine ribonucleoside triphosphate binding;purine ribonucleotide binding;ribonuc…	cell part;intracellular membrane-bounded organelle;intracellular organelle;intracellular organelle part;intracellular part;macromolecular complex;membrane-bounded organelle;nuclear part;nucleus;organelle;organelle part;PcG protein complex;protein complex;protein kinase CK2 complex
31.4983	32.7132	30.8691	29.95	17	17	17	27.7	27.7	27.7	98.577	0	303.06	10517000000	58	0.807315	0.663417	1.69617	1.96845	-	-	O54931	O54931	A-kinase anchor protein 2	Akap2	Akap2	-	-	-
26.5783	NaN	26.8218	27.8189	6	6	6	24.2	24.2	24.2	37.52	0	10.04	392880000	12	0	0.975488	-0.742033	0	-	-	O54950;Q91WG5	O54950	5-AMP-activated protein kinase subunit gamma-1	Prkag1	Prkag1	biological regulation;biosynthetic process;carbohydrate metabolic process;carboxylic acid biosynthetic process;carboxylic acid metabolic process;cellular biosynthetic process;cellular carbohydrate metabolic process;cellular component assembly;cellular component organization;cellular component organization or biogenesis;cellular glucan metabolic process;cellular ketone metabolic process;cellular l…	adenyl nucleotide binding;adenyl ribonucleotide binding;ADP binding;AMP binding;AMP-activated protein kinase activity;ATP binding;binding;cAMP-dependent protein kinase inhibitor activity;cAMP-dependent protein kinase regulator activity;catalytic activity;enzyme activator activity;enzyme binding;enzyme inhibitor activity;enzyme regulator activity;kinase activator activity;kinase activity;kinase bi…	AMP-activated protein kinase complex;cell part;cytoplasmic part;cytosol;extracellular membrane-bounded organelle;extracellular organelle;extracellular region part;extracellular space;extracellular vesicular exosome;intracellular membrane-bounded organelle;intracellular organelle;intracellular organelle part;intracellular part;macromolecular complex;membrane;membrane-bounded organelle;membrane-bou…
28.8715	30.1253	28.9307	NaN	3	3	3	30.3	30.3	30.3	10.102	0	39.349	1809700000	15	0	0.975045	0.567725	0	-	-	O54962	O54962	Barrier-to-autointegration factor;Barrier-to-autointegration factor, N-terminally processed	Banf1	Banf1	cellular macromolecule metabolic process;cellular metabolic process;cellular nitrogen compound metabolic process;cellular process;DNA integration;DNA metabolic process;macromolecule metabolic process;metabolic process;nitrogen compound metabolic process;nucleic acid metabolic process;nucleobase-containing compound metabolic process;primary metabolic process	binding;DNA binding;nucleic acid binding	cell part;chromosome;cytoplasm;extracellular membrane-bounded organelle;extracellular organelle;extracellular region part;extracellular vesicular exosome;intracellular membrane-bounded organelle;intracellular non-membrane-bounded organelle;intracellular organelle;intracellular organelle part;intracellular part;membrane-bounded organelle;membrane-bounded vesicle;non-membrane-bounded organelle;nucl…
28.434	30.6141	NaN	29.0435	11	11	11	33.2	33.2	33.2	33.523	0	64.845	2226800000	17	0	0.974603	0.480505	0	-	-	O54983	O54983	Ketimine reductase mu-crystallin	Crym	Crym	alcohol metabolic process;amine metabolic process;amine transport;amino acid transport;benzene-containing compound metabolic process;biological regulation;carboxylic acid metabolic process;carboxylic acid transport;cellular amine metabolic process;cellular amino acid metabolic process;cellular aromatic compound metabolic process;cellular ketone metabolic process;cellular metabolic process;cellula…	binding;catalytic activity;coenzyme binding;cofactor binding;hormone binding;identical protein binding;NADP binding;nucleotide binding;oxidoreductase activity;oxidoreductase activity, acting on the CH-NH group of donors;oxidoreductase activity, acting on the CH-NH group of donors, NAD or NADP as acceptor;protein binding;protein binding transcription factor activity;protein dimerization activity;p…	cell part;cytoplasm;cytoplasmic part;extracellular membrane-bounded organelle;extracellular organelle;extracellular region part;extracellular vesicular exosome;intracellular membrane-bounded organelle;intracellular organelle;intracellular part;membrane-bounded organelle;membrane-bounded vesicle;mitochondrion;nucleus;organelle;vesicle
29.6563	29.7094	28.9827	30.163	10	10	10	36.8	36.8	36.8	38.822	0	109.82	2811000000	31	0.0607346	0.984877	0.109974	0.159209	-	-	O54984	O54984	ATPase Asna1	Asna1	Asna1	cellular localization;cellular macromolecule localization;cellular process;cellular protein localization;establishment of localization;localization;localization within membrane;macromolecule localization;protein insertion into ER membrane;protein insertion into membrane;protein localization;protein localization to organelle;transport	adenyl nucleotide binding;adenyl ribonucleotide binding;ATP binding;ATPase activity;binding;catalytic activity;cation binding;hydrolase activity;hydrolase activity, acting on acid anhydrides;hydrolase activity, acting on acid anhydrides, in phosphorus-containing anhydrides;ion binding;metal ion binding;nucleoside-triphosphatase activity;nucleotide binding;purine nucleotide binding;purine ribonucl…	cell part;cytoplasmic part;endoplasmic reticulum;extracellular membrane-bounded organelle;extracellular organelle;extracellular region part;extracellular vesicular exosome;intracellular membrane-bounded organelle;intracellular non-membrane-bounded organelle;intracellular organelle;intracellular organelle part;intracellular part;membrane-bounded organelle;membrane-bounded vesicle;non-membrane-boun…
31.0719	31.4916	30.8727	29.7176	21	21	21	21.4	21.4	21.4	141.46	0	151.47	6779800000	54	0.602768	0.664409	0.98661	1.38085	-	-	O54988	O54988	STE20-like serine/threonine-protein kinase	Slk	Slk	activation of protein kinase activity;apoptosis;biological regulation;cell death;cellular macromolecule metabolic process;cellular metabolic process;cellular process;cellular protein metabolic process;cellular response to stimulus;cellular response to stress;death;intracellular protein kinase cascade;intracellular signal transduction;macromolecule metabolic process;macromolecule modification;meta…	adenyl nucleotide binding;adenyl ribonucleotide binding;ATP binding;binding;catalytic activity;identical protein binding;kinase activity;nucleotide binding;phosphotransferase activity, alcohol group as acceptor;protein binding;protein dimerization activity;protein homodimerization activity;protein kinase activity;protein serine/threonine kinase activity;purine nucleotide binding;purine ribonucleo…	cell part;cytoplasm;extracellular membrane-bounded organelle;extracellular organelle;extracellular region part;extracellular vesicular exosome;intracellular part;membrane-bounded organelle;membrane-bounded vesicle;organelle;vesicle
30.3708	30.4898	30.734	30.1157	4	4	4	23.3	23.3	23.3	20.302	0	26.36	4714700000	28	0.00533273	0.998096	0.00543404	0.0130995	-	-	O55013	O55013	Trafficking protein particle complex subunit 3	Trappc3	Trappc3	cellular process;ER to Golgi vesicle-mediated transport;establishment of localization;establishment of localization in cell;Golgi vesicle transport;intracellular transport;transport;vesicle-mediated transport	-	cell part;cytoplasmic part;cytosol;endoplasmic reticulum;Golgi apparatus part;Golgi membrane;intracellular membrane-bounded organelle;intracellular organelle;intracellular organelle part;intracellular part;macromolecular complex;membrane;membrane-bounded organelle;organelle;organelle membrane;organelle part;protein complex;TRAPP complex
30.1234	30.8261	31.0458	30.0128	8	8	8	26.2	26.2	26.2	21.694	0	17.37	5918200000	38	0.0276422	0.994279	-0.0545826	-0.0753176	-	-	O55022	O55022	Membrane-associated progesterone receptor component 1	Pgrmc1	Pgrmc1	axon guidance;chemotaxis;locomotion;response to chemical stimulus;response to external stimulus;response to stimulus;taxis	binding;cation binding;heme binding;ion binding;iron ion binding;lipid binding;metal ion binding;steroid binding;tetrapyrrole binding;transition metal ion binding	cell part;cytoplasmic part;endomembrane system;endoplasmic reticulum;endoplasmic reticulum membrane;endoplasmic reticulum part;extracellular membrane-bounded organelle;extracellular organelle;extracellular region part;extracellular vesicular exosome;integral to membrane;intracellular membrane-bounded organelle;intracellular non-membrane-bounded organelle;intracellular organelle;intracellular orga…
34.085	33.5044	34.6958	33.6162	21	21	21	52.7	52.7	52.7	30.436	0	114.7	58069000000	145	0.210927	0.926515	-0.361273	-0.506762	-	-	O55023	O55023	Inositol monophosphatase 1	Impa1	Impa1	alcohol biosynthetic process;alcohol metabolic process;biological regulation;biosynthetic process;carbohydrate biosynthetic process;carbohydrate metabolic process;catabolic process;cellular biosynthetic process;cellular carbohydrate biosynthetic process;cellular carbohydrate metabolic process;cellular lipid metabolic process;cellular metabolic process;cellular process;cellular response to stimulu…	alkali metal ion binding;binding;catalytic activity;cation binding;hydrolase activity;hydrolase activity, acting on ester bonds;identical protein binding;inositol monophosphate phosphatase activity;inositol or phosphatidylinositol phosphatase activity;inositol phosphate phosphatase activity;ion binding;lithium ion binding;magnesium ion binding;manganese ion binding;metal ion binding;phosphatase a…	cell part;cytoplasm;extracellular membrane-bounded organelle;extracellular organelle;extracellular region part;extracellular vesicular exosome;intracellular part;membrane-bounded organelle;membrane-bounded vesicle;organelle;vesicle
33.2157	32.3774	33.6892	32.455	18	18	18	36.2	36.2	36.2	54.319	0	206.18	28608000000	104	0.126493	0.97264	-0.275513	-0.325672	-	-	O55026	O55026	Ectonucleoside triphosphate diphosphohydrolase 2	Entpd2	Entpd2	biological regulation;catabolic process;cell activation;cell surface receptor linked signaling pathway;cellular catabolic process;cellular metabolic process;cellular nitrogen compound catabolic process;cellular nitrogen compound metabolic process;cellular process;cellular response to stimulus;G-protein coupled receptor protein signaling pathway;heterocycle catabolic process;heterocycle metabolic …	adenyl nucleotide binding;adenyl ribonucleotide binding;ATP binding;binding;catalytic activity;hydrolase activity;hydrolase activity, acting on acid anhydrides;hydrolase activity, acting on acid anhydrides, in phosphorus-containing anhydrides;nucleoside-diphosphatase activity;nucleoside-triphosphatase activity;nucleotide binding;purine nucleotide binding;purine ribonucleoside triphosphate binding…	basal lamina;cell part;extracellular matrix part;extracellular membrane-bounded organelle;extracellular organelle;extracellular region part;extracellular vesicular exosome;integral to membrane;intrinsic to membrane;membrane;membrane part;membrane-bounded organelle;membrane-bounded vesicle;organelle;plasma membrane;vesicle
32.1759	33.081	31.5011	30.15	28	28	28	35.7	35.7	35.7	102.45	0	134.82	14798000000	77	0.804383	0.668992	1.8029	1.97442	-	-	O55029	O55029	Coatomer subunit beta	Copb2	Copb2	cellular process;establishment of localization;establishment of localization in cell;establishment of protein localization;Golgi vesicle transport;intracellular protein transport;intracellular transport;intra-Golgi vesicle-mediated transport;protein transport;transport;vesicle-mediated transport	structural molecule activity	cell part;COPI vesicle coat;cytoplasmic part;cytoplasmic vesicle part;cytosol;Golgi apparatus;Golgi apparatus part;intracellular membrane-bounded organelle;intracellular organelle;intracellular organelle part;intracellular part;macromolecular complex;membrane coat;membrane part;membrane-bounded organelle;organelle;organelle part;protein complex;vesicle coat
33.9348	33.537	34.6605	32.8404	20	20	16	62.1	62.1	62.1	14.485	0	323.31	51614000000	140	0.00481649	0.998805	-0.0145302	-0.0140863	-	-	O55042	O55042	Alpha-synuclein	Snca	Snca	activation of caspase activity;adult behavior;adult locomotory behavior;aging;alcohol biosynthetic process;alcohol metabolic process;amine biosynthetic process;amine metabolic process;ATP synthesis coupled electron transport;behavior;behavioral response to cocaine;benzene-containing compound metabolic process;biological regulation;biosynthetic process;carboxylic acid metabolic process;catecholami…	alpha-tubulin binding;arachidonic acid binding;binding;calcium ion binding;carboxylic acid binding;caspase inhibitor activity;caspase regulator activity;catalytic activity;cation binding;copper ion binding;cysteine-type endopeptidase inhibitor activity;cytoskeletal protein binding;dynein binding;endopeptidase inhibitor activity;endopeptidase regulator activity;enzyme inhibitor activity;enzyme reg…	actin cytoskeleton;axon;axon part;cell cortex;cell junction;cell part;cell projection;cell projection part;clathrin-coated vesicle;coated vesicle;cytoplasm;cytoplasmic membrane-bounded vesicle;cytoplasmic part;cytoplasmic vesicle;cytoplasmic vesicle membrane;cytoplasmic vesicle part;cytoskeleton;cytosol;endoplasmic reticulum;extracellular matrix part;extracellular region part;extracellular space;…
NaN	NaN	28.0518	26.9257	6	6	6	41.3	41.3	41.3	17.348	0	14.929	595650000	11	0	0.974161	NaN	0	-	-	O55057	O55057	Retinal rod rhodopsin-sensitive cGMP 3,5-cyclic phosphodiesterase subunit delta	Pde6d	Pde6d	biological regulation;cellular process;cellular response to stimulus;detection of abiotic stimulus;detection of external stimulus;detection of light stimulus;detection of stimulus;metabolic process;multicellular organismal process;negative regulation of catalytic activity;negative regulation of GTPase activity;negative regulation of hydrolase activity;negative regulation of molecular function;neu…	3',5'-cyclic-GMP phosphodiesterase activity;3',5'-cyclic-nucleotide phosphodiesterase activity;binding;catalytic activity;cyclic-nucleotide phosphodiesterase activity;enzyme binding;enzyme inhibitor activity;enzyme regulator activity;GTPase binding;GTPase inhibitor activity;GTPase regulator activity;hydrolase activity;hydrolase activity, acting on ester bonds;nucleoside-triphosphatase regulator a…	cell part;cell projection;cytoplasmic part;cytoplasmic vesicle;cytoplasmic vesicle membrane;cytoplasmic vesicle part;cytoskeleton;cytosol;intracellular non-membrane-bounded organelle;intracellular organelle;intracellular organelle part;intracellular part;membrane;non-membrane-bounded organelle;organelle;organelle membrane;organelle part;vesicle;vesicle membrane
30.0025	30.4687	30.7864	NaN	7	7	7	24.5	24.5	24.5	36.276	0	104.97	3594000000	23	0	0.97372	-0.550844	0	-	-	O55091	O55091	Protein IMPACT	Impact	Impact	biological regulation;negative regulation of biological process;negative regulation of cellular metabolic process;negative regulation of cellular process;negative regulation of cellular protein metabolic process;negative regulation of macromolecule metabolic process;negative regulation of metabolic process;negative regulation of phosphate metabolic process;negative regulation of phosphorus metabo…	-	cell part;cytoplasm;intracellular part
30.1557	30.8547	30.7506	NaN	26	26	26	28.6	28.6	28.6	111.9	0	148.71	4063100000	49	0	0.973279	-0.24541	0	-	-	O55098	O55098	Serine/threonine-protein kinase 10	Stk10	Stk10	activation of protein kinase activity;biological adhesion;biological regulation;cell adhesion;cell cycle;cell-cell adhesion;cellular macromolecule metabolic process;cellular metabolic process;cellular process;cellular protein metabolic process;cellular response to stimulus;cellular response to stress;homotypic cell-cell adhesion;intracellular protein kinase cascade;intracellular signal transducti…	adenyl nucleotide binding;adenyl ribonucleotide binding;ATP binding;binding;catalytic activity;identical protein binding;kinase activity;nucleotide binding;phosphotransferase activity, alcohol group as acceptor;protein binding;protein dimerization activity;protein homodimerization activity;protein kinase activity;protein serine/threonine kinase activity;purine nucleotide binding;purine ribonucleo…	cell part;cytoplasm;extracellular membrane-bounded organelle;extracellular organelle;extracellular region part;extracellular vesicular exosome;intracellular part;membrane;membrane-bounded organelle;membrane-bounded vesicle;organelle;plasma membrane;vesicle
38.0452	37.6815	39.2875	38.4897	200	200	200	84.5	84.5	84.5	147.69	0	323.31	1380300000000	2430	0.840732	0.645756	-1.02527	-1.90422	-	-	O55103	O55103	Periaxin	Prx	Prx	biological regulation;regulation of biological process;regulation of cellular metabolic process;regulation of cellular process;regulation of gene expression;regulation of macromolecule metabolic process;regulation of metabolic process;regulation of nitrogen compound metabolic process;regulation of nucleobase-containing compound metabolic process;regulation of primary metabolic process;regulation …	-	cell part;cytoplasm;intracellular membrane-bounded organelle;intracellular organelle;intracellular part;membrane;membrane-bounded organelle;nucleus;organelle;plasma membrane
29.5682	29.7973	28.9461	NaN	11	10	10	22.1	20.8	20.8	85.965	0	42.06	1813800000	20	0	0.972838	0.736609	0	-	-	O55106	O55106	Striatin	Strn	Strn	biological regulation;cell surface receptor linked signaling pathway;cellular process;cellular response to stimulus;negative regulation of biological process;negative regulation of cell proliferation;negative regulation of cellular process;regulation of biological process;regulation of cell proliferation;regulation of cellular process;response to stimulus;signal transduction;Wnt receptor signalin…	armadillo repeat domain binding;binding;enzyme binding;estrogen receptor binding;hormone receptor binding;nuclear hormone receptor binding;phosphatase binding;protein binding;protein complex binding;protein domain specific binding;protein phosphatase 2A binding;protein phosphatase binding;receptor binding;steroid hormone receptor binding	cell junction;cell part;cell projection;cell projection part;cell-cell junction;cytoplasm;dendritic spine;intracellular part;macromolecular complex;membrane;neuron projection;neuron spine;occluding junction;protein complex;protein phosphatase type 2A complex;protein serine/threonine phosphatase complex;tight junction
29.2497	29.3368	30.6449	29.1478	10	10	10	28.9	28.9	28.9	33.363	0	24.238	3196800000	27	0.296184	0.872839	-0.603108	-0.709698	-	-	O55125	O55125	Protein NipSnap homolog 1	Nipsnap1	Nipsnap1	multicellular organismal process;neurological system process;sensory perception;sensory perception of pain;system process	binding;neurotransmitter binding	cell part;cytoplasmic part;intracellular membrane-bounded organelle;intracellular organelle;intracellular organelle part;intracellular part;membrane;membrane-bounded organelle;mitochondrial inner membrane;mitochondrial membrane;mitochondrial part;mitochondrion;organelle;organelle inner membrane;organelle membrane;organelle part;synapse part;synaptic membrane	+
31.5082	30.5267	32.7069	35.4642	26	26	26	70.8	70.8	70.8	32.932	0	323.31	41405000000	97	0.767063	0.657934	-3.06807	-1.96244	-	-	O55126	O55126	Protein NipSnap homolog 2	Gbas	Gbas	ATP biosynthetic process;ATP metabolic process;biological regulation;biosynthetic process;cellular biosynthetic process;cellular metabolic process;cellular nitrogen compound biosynthetic process;cellular nitrogen compound metabolic process;cellular process;generation of precursor metabolites and energy;heterocycle biosynthetic process;heterocycle metabolic process;metabolic process;negative regul…	-	cell part;cytoplasmic part;intracellular membrane-bounded organelle;intracellular organelle;intracellular part;membrane-bounded organelle;mitochondrion;organelle	+
35.8022	35.8893	35.8372	34.2557	43	43	42	71.3	71.3	71.3	50.549	0	323.31	175450000000	394	0.377683	0.800781	0.799282	0.896113	-	-	O55131;Q9DA97	O55131	Septin-7	2020-09-07	2020-09-07	anatomical structure morphogenesis;biological regulation;cell cycle;cell cycle phase;cell cycle process;cell division;cell part morphogenesis;cell projection morphogenesis;cell projection organization;cellular component assembly;cellular component morphogenesis;cellular component organization;cellular component organization at cellular level;cellular component organization or biogenesis;cellular …	binding;GTP binding;guanyl nucleotide binding;guanyl ribonucleotide binding;identical protein binding;nucleotide binding;protein binding;purine nucleotide binding;purine ribonucleoside triphosphate binding;purine ribonucleotide binding;ribonucleotide binding	actin cytoskeleton;actin filament bundle;actomyosin;axon part;axon terminus;axoneme;cell cortex;cell cortex part;cell division site part;cell part;cell projection part;chromosomal part;cleavage furrow;condensed chromosome kinetochore;cytoplasm;cytoplasmic part;cytoskeletal part;cytoskeleton;extracellular membrane-bounded organelle;extracellular organelle;extracellular region part;extracellular ve…
30.9537	31.7225	32.034	32.3816	8	8	8	40.8	40.8	40.8	26.511	0	240.29	12096000000	40	0.756008	0.678122	-0.869735	-1.6665	-	-	O55135	O55135	Eukaryotic translation initiation factor 6	Eif6	Eif6	cellular component assembly;cellular component assembly at cellular level;cellular component biogenesis;cellular component biogenesis at cellular level;cellular component organization;cellular component organization at cellular level;cellular component organization or biogenesis;cellular component organization or biogenesis at cellular level;cellular localization;cellular macromolecular complex a…	binding;nucleic acid binding;ribonucleoprotein binding;ribosomal large subunit binding;ribosome binding;RNA binding;translation factor activity, nucleic acid binding;translation initiation factor activity	cell part;cytoplasm;cytoskeletal part;extracellular membrane-bounded organelle;extracellular organelle;extracellular region part;extracellular vesicular exosome;intermediate filament;intracellular membrane-bounded organelle;intracellular non-membrane-bounded organelle;intracellular organelle;intracellular organelle part;intracellular part;lamin filament;macromolecular complex;membrane-bounded org…
31.9086	32.7431	32.1103	31.5101	21	9	9	50.1	25.5	25.5	46.135	0	201.78	16402000000	63	0.375328	0.82557	0.515656	0.839892	-	-	O55137;Q9QYR7;Q32Q92;Q8BWN8;Q6Q2Z6	O55137	Acyl-coenzyme A thioesterase 1	Acot1	Acot1	acyl-CoA metabolic process;carboxylic acid catabolic process;carboxylic acid metabolic process;catabolic process;cellular catabolic process;cellular ketone metabolic process;cellular lipid metabolic process;cellular metabolic process;cellular process;coenzyme metabolic process;cofactor metabolic process;dicarboxylic acid catabolic process;dicarboxylic acid metabolic process;fatty acid metabolic p…	acyl-CoA hydrolase activity;acyl-CoA thioesterase activity;binding;carboxylic ester hydrolase activity;catalytic activity;CoA hydrolase activity;hydrolase activity;hydrolase activity, acting on ester bonds;palmitoyl-CoA hydrolase activity;protein binding;receptor binding;succinyl-CoA hydrolase activity;thiolester hydrolase activity	cell part;cytoplasm;cytoplasmic part;cytosol;intracellular membrane-bounded organelle;intracellular organelle;intracellular part;membrane-bounded organelle;microbody;mitochondrion;organelle;peroxisome
27.9293	29.4873	NaN	NaN	7	7	7	54.5	54.5	54.5	12.554	0	4.5329	1392000000	9	0	0.972398	NaN	0	-	-	O55142	O55142	60S ribosomal protein L35a	Rpl35a	Rpl35a	biosynthetic process;cellular biosynthetic process;cellular component biogenesis;cellular component biogenesis at cellular level;cellular component organization or biogenesis;cellular component organization or biogenesis at cellular level;cellular macromolecule biosynthetic process;cellular macromolecule metabolic process;cellular metabolic process;cellular nitrogen compound metabolic process;cel…	structural constituent of ribosome;structural molecule activity	cell part;cytoplasmic part;cytosolic large ribosomal subunit;extracellular membrane-bounded organelle;extracellular organelle;extracellular region part;extracellular vesicular exosome;intracellular membrane-bounded organelle;intracellular organelle;intracellular organelle part;intracellular part;large ribosomal subunit;macromolecular complex;membrane;membrane-bounded organelle;membrane-bounded ve…	+
30.5236	30.7431	31.0781	29.2895	44	18	17	34.4	19	17.5	114.86	0	182.27	5148700000	54	0.175678	0.946889	0.449524	0.449084	-	-	O55143	O55143	Sarcoplasmic/endoplasmic reticulum calcium ATPase 2	Atp2a2	Atp2a2	biological regulation;calcium ion homeostasis;calcium ion transmembrane transport;calcium ion transport;calcium-mediated signaling;cation homeostasis;cation transport;cellular calcium ion homeostasis;cellular cation homeostasis;cellular chemical homeostasis;cellular component organization;cellular component organization at cellular level;cellular component organization or biogenesis;cellular comp…	active transmembrane transporter activity;adenyl nucleotide binding;adenyl ribonucleotide binding;ATP binding;ATPase activity;ATPase activity, coupled;ATPase activity, coupled to movement of substances;ATPase activity, coupled to transmembrane movement of ions;ATPase activity, coupled to transmembrane movement of ions, phosphorylative mechanism;ATPase activity, coupled to transmembrane movement o…	cell junction;cell part;cell-cell contact zone;cell-cell junction;cytoplasmic part;endoplasmic reticulum;endoplasmic reticulum membrane;endoplasmic reticulum part;intercalated disc;intracellular membrane-bounded organelle;intracellular organelle;intracellular organelle part;intracellular part;longitudinal sarcoplasmic reticulum;membrane;membrane part;membrane-bounded organelle;organelle;organelle…
28.8305	26.5502	30.9546	26.6438	2	2	2	15.4	15.4	15.4	13.648	0	18.921	2108400000	9	0.15871	0.94529	-1.10884	-0.436821	-	-	O55186	O55186	CD59A glycoprotein	Cd59a	Cd59a	biological regulation;cell activation;cellular process;cytokine production;multicellular organismal process;negative regulation of activation of membrane attack complex;negative regulation of angiogenesis;negative regulation of biological process;negative regulation of cell communication;negative regulation of cellular process;negative regulation of cellular response to growth factor stimulus;neg…	binding;complement binding;protein binding	anchored to membrane;cell part;external side of plasma membrane;extracellular region;intrinsic to membrane;membrane part;plasma membrane part
28.4859	28.54	28.7303	NaN	10	10	10	13.4	13.4	13.4	120.66	0	59.652	978760000	18	0	0.971958	-0.217318	0	-	-	O55201	O55201	Transcription elongation factor SPT5	Supt5h	Supt5h	biological regulation;biosynthetic process;cellular biosynthetic process;cellular macromolecule metabolic process;cellular metabolic process;cellular nitrogen compound metabolic process;cellular process;macromolecule metabolic process;metabolic process;negative regulation of biological process;negative regulation of biosynthetic process;negative regulation of cellular biosynthetic process;negativ…	binding;chromatin binding;enzyme binding;protein binding;protein dimerization activity;protein heterodimerization activity	cell part;DSIF complex;intracellular membrane-bounded organelle;intracellular organelle;intracellular organelle part;intracellular part;macromolecular complex;membrane-bounded organelle;nuclear part;nucleoplasm;nucleoplasm part;nucleus;organelle;organelle part;protein complex;transcription elongation factor complex
33.7439	32.7548	33.6054	33.07	32	32	32	62.2	62.2	62.2	51.373	0	184.6	37886000000	179	0.0507903	0.985284	-0.0883217	-0.133337	-	-	O55222	O55222	Integrin-linked protein kinase	Ilk	Ilk	aging;ameboidal cell migration;anatomical structure development;anatomical structure formation involved in morphogenesis;anatomical structure morphogenesis;axon ensheathment;biological adhesion;biological regulation;branching involved in ureteric bud morphogenesis;branching morphogenesis of a tube;cell adhesion;cell aging;cell cycle arrest;cell cycle process;cell development;cell migration;cell m…	adenyl nucleotide binding;adenyl ribonucleotide binding;ATP binding;binding;catalytic activity;enzyme binding;kinase activity;kinase binding;molecular transducer activity;nucleotide binding;phosphotransferase activity, alcohol group as acceptor;protein binding;protein kinase activity;protein kinase binding;protein serine/threonine kinase activity;purine nucleotide binding;purine ribonucleoside tr…	actin filament bundle;actomyosin;adherens junction;anchoring junction;axon part;cell body;cell junction;cell part;cell projection;cell projection part;cell-cell junction;cell-substrate adherens junction;cell-substrate junction;contractile fiber part;costamere;cytoplasm;cytoplasmic part;cytoskeletal part;dendritic shaft;focal adhesion;intracellular organelle part;intracellular part;lamellipodium;m…
28.1261	28.5018	29.4379	28.4578	8	8	8	25.4	25.4	25.4	45.126	0	26.126	1501300000	17	0.455177	0.736168	-0.633859	-1.0144	-	-	O55229	O55229	Choline/ethanolamine kinase	Chkb	Chkb	alcohol metabolic process;amine biosynthetic process;amine metabolic process;anatomical structure development;biosynthetic process;CDP-choline pathway;cellular amine metabolic process;cellular biogenic amine biosynthetic process;cellular biogenic amine metabolic process;cellular biosynthetic process;cellular lipid metabolic process;cellular metabolic process;cellular nitrogen compound biosyntheti…	adenyl nucleotide binding;adenyl ribonucleotide binding;ATP binding;binding;catalytic activity;choline kinase activity;ethanolamine kinase activity;kinase activity;nucleotide binding;phosphotransferase activity, alcohol group as acceptor;purine nucleotide binding;purine ribonucleoside triphosphate binding;purine ribonucleotide binding;ribonucleotide binding;transferase activity;transferase activi…	-
32.4892	32.6198	33.0184	32.9368	17	17	17	51.1	51.1	51.1	28.532	0	157.72	23937000000	98	1.50084	0.799129	-0.423084	-2.39032	-	-	O55234	O55234	Proteasome subunit beta type-5	Psmb5	Psmb5	catabolic process;cellular catabolic process;cellular macromolecule catabolic process;cellular macromolecule metabolic process;cellular metabolic process;cellular process;macromolecule catabolic process;macromolecule metabolic process;metabolic process;modification-dependent macromolecule catabolic process;modification-dependent protein catabolic process;primary metabolic process;proteasomal prot…	catalytic activity;endopeptidase activity;hydrolase activity;peptidase activity;peptidase activity, acting on L-amino acid peptides;threonine-type endopeptidase activity;threonine-type peptidase activity	cell part;centrosome;cytoplasm;cytoplasmic part;cytoskeletal part;cytosol;extracellular membrane-bounded organelle;extracellular organelle;extracellular region part;extracellular vesicular exosome;intracellular membrane-bounded organelle;intracellular non-membrane-bounded organelle;intracellular organelle;intracellular organelle part;intracellular part;macromolecular complex;membrane-bounded orga…
29.2918	28.5829	29.3206	NaN	12	12	12	10.3	10.3	10.3	149.47	0	16.749	1363900000	18	0	0.971519	-0.383255	0	-	-	O70133	O70133	ATP-dependent RNA helicase A	Dhx9	Dhx9	biological regulation;cell differentiation;cellular developmental process;cellular macromolecule metabolic process;cellular metabolic process;cellular nitrogen compound metabolic process;cellular process;cellular response to heat;cellular response to stimulus;cellular response to stress;circadian rhythm;CRD-mediated mRNA stabilization;developmental process;macromolecule metabolic process;metaboli…	adenyl nucleotide binding;adenyl ribonucleotide binding;ATP binding;ATPase activity;ATPase activity, coupled;ATP-dependent helicase activity;ATP-dependent RNA helicase activity;binding;catalytic activity;DNA binding;helicase activity;hydrolase activity;hydrolase activity, acting on acid anhydrides;hydrolase activity, acting on acid anhydrides, in phosphorus-containing anhydrides;nucleic acid bind…	cell part;centrosome;CRD-mediated mRNA stability complex;cytoplasm;cytoplasmic part;cytoskeletal part;intracellular membrane-bounded organelle;intracellular non-membrane-bounded organelle;intracellular organelle;intracellular organelle part;intracellular part;macromolecular complex;membrane;membrane-bounded organelle;microtubule organizing center;non-membrane-bounded organelle;nuclear part;nucleo…
26.7876	27.8801	NaN	NaN	6	6	6	13.9	13.9	13.9	59.485	0	8.1511	301250000	9	0	0.97108	NaN	0	-	-	O70145	O70145	Neutrophil cytosol factor 2	Ncf2	Ncf2	aging;biological regulation;catabolic process;cellular catabolic process;cellular metabolic process;cellular nitrogen compound catabolic process;cellular nitrogen compound metabolic process;cellular process;cellular response to chemical stimulus;cellular response to endogenous stimulus;cellular response to hormone stimulus;cellular response to organic substance;cellular response to stimulus;coenz…	binding;enzyme binding;GTPase binding;protein binding;protein C-terminus binding;Rac GTPase binding;Ras GTPase binding;Rho GTPase binding;small GTPase binding	acrosomal vesicle;cell part;cytoplasm;cytoplasmic membrane-bounded vesicle;cytoplasmic part;cytoplasmic vesicle;cytosol;intracellular membrane-bounded organelle;intracellular non-membrane-bounded organelle;intracellular organelle;intracellular organelle part;intracellular part;membrane;membrane-bounded organelle;membrane-bounded vesicle;non-membrane-bounded organelle;nuclear part;nucleolus;organe…
32.5837	32.6887	33.2942	31.8332	21	21	15	46.2	46.2	36	46.151	0	179.89	22242000000	103	0.0314323	0.995628	0.0724897	0.0870886	-	-	O70172	O70172	Phosphatidylinositol 5-phosphate 4-kinase type-2 alpha	Pip4k2a	Pip4k2a	anatomical structure development;cell development;cellular developmental process;cellular process;developmental process;megakaryocyte development	1-phosphatidylinositol-5-phosphate 4-kinase activity;adenyl nucleotide binding;adenyl ribonucleotide binding;ATP binding;binding;catalytic activity;inositol or phosphatidylinositol kinase activity;kinase activity;lipid kinase activity;nucleotide binding;phosphatidylinositol phosphate kinase activity;phosphotransferase activity, alcohol group as acceptor;purine nucleotide binding;purine ribonucleo…	cell part;cytoplasm;intracellular membrane-bounded organelle;intracellular organelle;intracellular part;membrane;membrane-bounded organelle;nucleus;organelle;plasma membrane
31.38	31.9958	31.5063	30.4687	14	14	14	27.6	27.6	27.6	63.988	0	150.59	9950100000	67	0.437177	0.749149	0.700454	0.996006	-	-	O70194	O70194	Eukaryotic translation initiation factor 3 subunit D	Eif3d	Eif3d	biological regulation;cellular component assembly;cellular component assembly at cellular level;cellular component organization;cellular component organization at cellular level;cellular component organization or biogenesis;cellular component organization or biogenesis at cellular level;cellular macromolecular complex assembly;cellular macromolecular complex subunit organization;cellular process;…	binding;nucleic acid binding;RNA binding;translation factor activity, nucleic acid binding;translation initiation factor activity	cell part;cytoplasmic part;eukaryotic 43S preinitiation complex;eukaryotic 48S preinitiation complex;eukaryotic translation initiation factor 3 complex;eukaryotic translation initiation factor 3 complex, eIF3m;intracellular part;macromolecular complex;membrane;protein complex;ribonucleoprotein complex;translation preinitiation complex
31.112	31.4058	28.4174	33.2607	8	8	8	37.7	37.7	37.7	34.299	0	107.08	10485000000	46	0.0562419	0.981915	0.419866	0.166211	-	-	O70209	O70209	PDZ and LIM domain protein 3	Pdlim3	Pdlim3	actin cytoskeleton organization;actin filament organization;actin filament-based process;anatomical structure development;cellular component organization;cellular component organization at cellular level;cellular component organization or biogenesis;cellular component organization or biogenesis at cellular level;cellular process;cytoskeleton organization;developmental process;heart development;or…	binding;cation binding;cytoskeletal protein binding;ion binding;metal ion binding;protein binding;structural constituent of muscle;structural molecule activity;transition metal ion binding;zinc ion binding	actin cytoskeleton;cell part;contractile fiber part;cytoplasmic part;cytoskeleton;intracellular non-membrane-bounded organelle;intracellular organelle;intracellular part;non-membrane-bounded organelle;organelle;organelle part;Z disc
37.2124	37.5307	37.0778	39.4345	47	47	38	99.6	99.6	96.4	28.827	0	323.31	960420000000	683	0.27209	0.876052	-0.884565	-0.686206	-	-	O70250	O70250	Phosphoglycerate mutase 2	Pgam2	Pgam2	alcohol biosynthetic process;alcohol catabolic process;alcohol metabolic process;biosynthetic process;carbohydrate biosynthetic process;carbohydrate catabolic process;carbohydrate metabolic process;catabolic process;cellular biosynthetic process;cellular carbohydrate biosynthetic process;cellular carbohydrate catabolic process;cellular carbohydrate metabolic process;cellular metabolic process;cel…	2,3-bisphosphoglycerate-dependent phosphoglycerate mutase activity;binding;bisphosphoglycerate 2-phosphatase activity;bisphosphoglycerate mutase activity;bisphosphoglycerate phosphatase activity;catalytic activity;cofactor binding;hydrolase activity;hydrolase activity, acting on ester bonds;intramolecular transferase activity;intramolecular transferase activity, phosphotransferases;isomerase acti…	cell part;cytoplasmic part;cytosol;extracellular membrane-bounded organelle;extracellular organelle;extracellular region part;extracellular vesicular exosome;intracellular membrane-bounded organelle;intracellular organelle;intracellular part;membrane-bounded organelle;membrane-bounded vesicle;nucleus;organelle;vesicle
31.9109	33.5182	31.4565	31.2384	9	9	9	41.3	41.3	41.3	24.693	0	74.239	17775000000	42	0.630975	0.663627	1.36712	1.50067	-	-	O70251	O70251	Elongation factor 1-beta	Eef1b	Eef1b	-	binding;nucleic acid binding;RNA binding;translation elongation factor activity;translation factor activity, nucleic acid binding	cell part;cytoplasm;cytoplasmic part;eukaryotic translation elongation factor 1 complex;intracellular part;macromolecular complex;protein complex
29.3689	29.2716	29.1061	NaN	9	9	9	48.3	48.3	48.3	35.738	0	134.27	1631400000	28	0	0.970641	0.214128	0	-	-	O70252	O70252	Heme oxygenase 2	Hmox2	Hmox2	cellular metabolic process;cellular process;cofactor metabolic process;heme metabolic process;heme oxidation;heterocycle metabolic process;metabolic process;nitrogen compound metabolic process;oxidation-reduction process;pigment metabolic process;porphyrin-containing compound metabolic process;response to chemical stimulus;response to hypoxia;response to oxidative stress;response to oxygen levels…	binding;catalytic activity;cation binding;heme oxygenase (decyclizing) activity;ion binding;metal ion binding;oxidoreductase activity;oxidoreductase activity, acting on paired donors, with incorporation or reduction of molecular oxygen	cell part;cytoplasmic part;endoplasmic reticulum;intracellular membrane-bounded organelle;intracellular organelle;intracellular part;membrane;membrane-bounded organelle;organelle;plasma membrane
29.5029	29.6495	30.2696	29.7811	4	4	4	13.3	13.3	13.3	49.735	0	70.498	2841700000	20	0.657064	0.663795	-0.449154	-1.26515	-	-	O70258	O70258	Epsilon-sarcoglycan	Sgce	Sgce	-	binding;calcium ion binding;cation binding;ion binding;metal ion binding	cell part;cell projection;cell projection membrane;cell projection part;cytoplasmic part;cytoskeleton;dendrite;dendrite membrane;dystrophin-associated glycoprotein complex;Golgi apparatus;integral to membrane;integral to plasma membrane;intracellular membrane-bounded organelle;intracellular non-membrane-bounded organelle;intracellular organelle;intracellular part;intrinsic to membrane;intrinsic t…
27.8318	28.9601	27.9683	29.0157	2	2	2	21.6	21.6	21.6	19.127	0	19.801	1204600000	16	0.0399596	0.990516	-0.0960627	-0.11045	-	-	O70274	O70274	Protein tyrosine phosphatase type IVA 2	Ptp4a2	Ptp4a2	-	catalytic activity;hydrolase activity;hydrolase activity, acting on ester bonds;phosphatase activity;phosphoprotein phosphatase activity;phosphoric ester hydrolase activity;protein tyrosine phosphatase activity	cell part;cytoplasm;cytoplasmic part;early endosome;endosome;extracellular membrane-bounded organelle;extracellular organelle;extracellular region part;extracellular vesicular exosome;intracellular membrane-bounded organelle;intracellular organelle;intracellular part;membrane;membrane-bounded organelle;membrane-bounded vesicle;organelle;plasma membrane;vesicle
29.477	28.7061	28.835	NaN	11	10	10	12.2	11.6	11.6	136.48	0	70.679	1416500000	17	0	0.970203	0.256505	0	-	-	O70305	O70305	Ataxin-2	Atxn2	Atxn2	anatomical structure morphogenesis;biological regulation;cell differentiation;cell differentiation in hindbrain;cell part morphogenesis;cell projection morphogenesis;cell projection organization;cellular component assembly;cellular component assembly at cellular level;cellular component morphogenesis;cellular component organization;cellular component organization at cellular level;cellular compon…	binding;epidermal growth factor receptor binding;growth factor receptor binding;protein binding;protein C-terminus binding;receptor binding	cell part;cytoplasm;cytoplasmic part;Golgi apparatus;Golgi apparatus part;intracellular membrane-bounded organelle;intracellular non-membrane-bounded organelle;intracellular organelle;intracellular organelle part;intracellular part;macromolecular complex;membrane;membrane-bounded organelle;non-membrane-bounded organelle;nuclear part;nucleoplasm;organelle;organelle part;perinuclear region of cytop…	+
29.5826	29.4814	29.8002	29.4749	12	12	11	29.8	29.8	28.4	56.888	0	44.133	2646000000	31	0.222848	0.957334	-0.105561	-0.390492	-	-	O70310	O70310	Glycylpeptide N-tetradecanoyltransferase 1	Nmt1	Nmt1	cellular macromolecule metabolic process;cellular metabolic process;cellular process;cellular protein metabolic process;chordate embryonic development;developmental process;embryo development;embryo development ending in birth or egg hatching;in utero embryonic development;macromolecule metabolic process;macromolecule modification;metabolic process;N-terminal peptidyl-glycine N-myristoylation;N-t…	catalytic activity;glycylpeptide N-tetradecanoyltransferase activity;myristoyltransferase activity;N-acyltransferase activity;transferase activity;transferase activity, transferring acyl groups;transferase activity, transferring acyl groups other than amino-acyl groups	actin cytoskeleton;cell junction;cell part;cytoplasm;cytoplasmic part;cytoskeleton;cytosol;extrinsic to membrane;intracellular non-membrane-bounded organelle;intracellular organelle;intracellular part;membrane;membrane part;non-membrane-bounded organelle;organelle;plasma membrane
35.9282	35.8985	36.6616	35.2933	86	86	76	71.8	71.8	70.2	109.94	0	323.31	227160000000	553	0.0296638	0.993947	-0.0640335	-0.0816437	-	-	O70318	O70318	Band 4.1-like protein 2	Epb41l2	Epb41l2	actin cytoskeleton organization;actin filament-based process;biological regulation;cellular component organization;cellular component organization at cellular level;cellular component organization or biogenesis;cellular component organization or biogenesis at cellular level;cellular process;cortical actin cytoskeleton organization;cortical cytoskeleton organization;cytoskeleton organization;organ…	actin binding;binding;cytoskeletal protein binding;PH domain binding;protein binding;protein domain specific binding;spectrin binding;structural molecule activity	actin cytoskeleton;adherens junction;anchoring junction;cell junction;cell part;cell-substrate adherens junction;cell-substrate junction;cytoplasm;cytoskeleton;extracellular membrane-bounded organelle;extracellular organelle;extracellular region part;extracellular vesicular exosome;extrinsic to membrane;focal adhesion;intracellular membrane-bounded organelle;intracellular non-membrane-bounded org…
30.6921	30.5158	30.287	30.0589	7	7	7	45.7	45.7	45.7	22.228	0	31.23	4686200000	34	1.01754	0.68005	0.430977	1.76512	-	-	O70325	O70325	Phospholipid hydroperoxide glutathione peroxidase, mitochondrial	Gpx4	Gpx4	cellular component organization;cellular component organization at cellular level;cellular component organization or biogenesis;cellular component organization or biogenesis at cellular level;cellular process;chromatin organization;chromosome organization;developmental process;gamete generation;male gamete generation;multicellular organismal development;multicellular organismal process;multicellu…	antioxidant activity;catalytic activity;glutathione peroxidase activity;oxidoreductase activity;oxidoreductase activity, acting on paired donors, with incorporation or reduction of molecular oxygen;oxidoreductase activity, acting on peroxide as acceptor;peroxidase activity;phospholipid-hydroperoxide glutathione peroxidase activity	cell part;cytoplasmic part;cytosol;envelope;extracellular membrane-bounded organelle;extracellular organelle;extracellular region part;extracellular vesicular exosome;intracellular membrane-bounded organelle;intracellular organelle;intracellular organelle part;intracellular part;membrane;membrane-bounded organelle;membrane-bounded vesicle;mitochondrial inner membrane;mitochondrial membrane;mitoch…	+
30.3273	28.351	28.1226	27.9691	14	14	14	21.6	21.6	21.6	93.254	0	40.427	1856500000	25	0.492335	0.669585	1.29335	1.18534	-	-	O70362	O70362	Phosphatidylinositol-glycan-specific phospholipase D	Gpld1	Gpld1	activation of immune response;alcohol metabolic process;amine metabolic process;biological regulation;blood vessel endothelial cell migration;cell differentiation;cell migration;cell migration involved in sprouting angiogenesis;cell motility;cell surface receptor linked signaling pathway;cellular amine metabolic process;cellular biogenic amine metabolic process;cellular component movement;cellula…	catalytic activity;channel regulator activity;glycosylphosphatidylinositol phospholipase D activity;hydrolase activity;hydrolase activity, acting on ester bonds;lipase activity;phospholipase activity;phospholipase D activity;phosphoric diester hydrolase activity;phosphoric ester hydrolase activity;sodium channel regulator activity	cell part;cytoplasm;cytoplasmic part;extracellular matrix;extracellular membrane-bounded organelle;extracellular organelle;extracellular region;extracellular region part;extracellular space;extracellular vesicular exosome;high-density lipoprotein particle;intracellular;intracellular membrane-bounded organelle;intracellular organelle;intracellular organelle part;intracellular part;lysosomal membra…
32.2223	31.9946	31.1283	31.114	13	13	13	60.6	60.6	60.6	35.774	0	154.15	11772000000	57	1.88291	1	0.987274	4.6113	+	-	O70400	O70400	PDZ and LIM domain protein 1	Pdlim1	Pdlim1	biological regulation;regulation of biological process;regulation of biosynthetic process;regulation of cellular biosynthetic process;regulation of cellular macromolecule biosynthetic process;regulation of cellular metabolic process;regulation of cellular process;regulation of gene expression;regulation of macromolecule biosynthetic process;regulation of macromolecule metabolic process;regulation…	binding;cation binding;ion binding;metal ion binding;protein binding transcription factor activity;transcription coactivator activity;transcription cofactor activity;transcription factor binding transcription factor activity;transition metal ion binding;zinc ion binding	adherens junction;anchoring junction;cell junction;cell part;cell-substrate adherens junction;cell-substrate junction;cytoplasm;cytoskeleton;focal adhesion;intracellular non-membrane-bounded organelle;intracellular organelle;intracellular organelle part;intracellular part;macromolecular complex;non-membrane-bounded organelle;nuclear part;nucleoplasm part;organelle;organelle part;protein complex;t…
29.344	30.1697	28.9585	27.6389	4	4	4	54.5	54.5	54.5	11.451	0	75.286	2208000000	14	0.694921	0.676701	1.45819	1.66014	-	-	O70404	O70404	Vesicle-associated membrane protein 8	Vamp8	Vamp8	autophagic vacuole fusion;biological regulation;body fluid secretion;cellular component assembly;cellular component assembly at cellular level;cellular component organization;cellular component organization at cellular level;cellular component organization or biogenesis;cellular component organization or biogenesis at cellular level;cellular macromolecular complex assembly;cellular macromolecular…	binding;channel inhibitor activity;channel regulator activity;chloride channel inhibitor activity;chloride channel regulator activity;ion channel inhibitor activity;protein binding;SNAP receptor activity;SNARE binding	azurophil granule membrane;cell part;cell surface;cytoplasm;cytoplasmic membrane-bounded vesicle;cytoplasmic part;cytoplasmic vesicle;cytoplasmic vesicle membrane;cytoplasmic vesicle part;cytosol;early endosome;endosomal part;endosome;endosome membrane;extracellular membrane-bounded organelle;extracellular organelle;extracellular region part;extracellular vesicular exosome;integral to membrane;in…
31.8847	32.2721	31.6903	30.9086	14	14	14	27.6	27.6	27.6	84.533	0	159.21	11213000000	69	0.665429	0.650405	0.778922	1.45271	-	-	O70423;Q812C9	O70423	Membrane primary amine oxidase	Aoc3	Aoc3	alcohol metabolic process;amine metabolic process;benzene-containing compound metabolic process;biological adhesion;catecholamine metabolic process;catechol-containing compound metabolic process;cation transport;cell adhesion;cellular amine metabolic process;cellular aromatic compound metabolic process;cellular biogenic amine metabolic process;cellular metabolic process;cellular nitrogen compound…	aliphatic-amine oxidase activity;aminoacetone:oxygen oxidoreductase(deaminating) activity;binding;calcium ion binding;catalytic activity;cation binding;cation channel activity;cation transmembrane transporter activity;channel activity;cofactor binding;copper ion binding;ion binding;ion channel activity;ion transmembrane transporter activity;metal ion binding;oxidoreductase activity;oxidoreductase…	cell part;cell projection;cell surface;cytoplasm;cytoplasmic part;early endosome;endoplasmic reticulum;endosome;Golgi apparatus;integral to membrane;intracellular membrane-bounded organelle;intracellular organelle;intracellular part;intrinsic to membrane;membrane;membrane part;membrane-bounded organelle;microvillus;organelle;plasma membrane
33.5753	33.643	33.2232	34.306	21	21	21	67.1	67.1	67.1	28.405	0	118.34	43764000000	123	0.0961243	0.974796	-0.155416	-0.241905	-	-	O70435	O70435	Proteasome subunit alpha type-3	Psma3	Psma3	catabolic process;cellular catabolic process;cellular macromolecule catabolic process;cellular macromolecule metabolic process;cellular metabolic process;cellular process;macromolecule catabolic process;macromolecule metabolic process;metabolic process;modification-dependent macromolecule catabolic process;modification-dependent protein catabolic process;primary metabolic process;proteasomal prot…	catalytic activity;endopeptidase activity;hydrolase activity;peptidase activity;peptidase activity, acting on L-amino acid peptides;threonine-type endopeptidase activity;threonine-type peptidase activity	cell part;cytoplasm;cytoplasmic part;cytosol;extracellular membrane-bounded organelle;extracellular organelle;extracellular region part;extracellular vesicular exosome;intracellular membrane-bounded organelle;intracellular organelle;intracellular part;macromolecular complex;membrane-bounded organelle;membrane-bounded vesicle;nucleus;organelle;proteasome complex;proteasome core complex;proteasome …
28.7605	29.2151	29.8107	NaN	6	6	6	33	33	33	29.82	0	73.697	1784600000	18	0	0.969765	-0.82294	0	-	-	O70439	O70439	Syntaxin-7	Stx7	Stx7	biological regulation;cellular component assembly;cellular component assembly at cellular level;cellular component organization;cellular component organization at cellular level;cellular component organization or biogenesis;cellular component organization or biogenesis at cellular level;cellular localization;cellular membrane fusion;cellular membrane organization;cellular process;establishment of…	binding;channel inhibitor activity;channel regulator activity;chloride channel inhibitor activity;chloride channel regulator activity;ion channel inhibitor activity;protein binding;SNAP receptor activity;SNARE binding;syntaxin binding	azurophil granule;cell part;cytoplasmic membrane-bounded vesicle;cytoplasmic part;cytoplasmic vesicle;early endosome;early endosome membrane;endocytic vesicle;endomembrane system;endosomal part;endosome;endosome membrane;extracellular membrane-bounded organelle;extracellular organelle;extracellular region part;extracellular vesicular exosome;immunological synapse;integral to membrane;intracellula…
33.8647	34.2871	NaN	NaN	8	2	2	24.2	8.5	8.5	27.706	0.00047893	2.452	51915000000	4	0	0.969328	NaN	0	-	-	O70456	O70456	14-3-3 protein sigma	Sfn	Sfn	anatomical structure development;apoptotic mitochondrial changes;biological regulation;cell development;cell differentiation;cellular component organization;cellular component organization at cellular level;cellular component organization or biogenesis;cellular component organization or biogenesis at cellular level;cellular developmental process;cellular process;cellular response to stimulus;cell…	binding;enzyme binding;kinase binding;phosphoprotein binding;protein binding;protein kinase binding	cell part;cytoplasm;cytoplasmic part;cytoplasmic vesicle membrane;cytoplasmic vesicle part;cytosol;extracellular membrane-bounded organelle;extracellular organelle;extracellular region part;extracellular vesicular exosome;intracellular membrane-bounded organelle;intracellular organelle;intracellular organelle part;intracellular part;membrane;membrane-bounded organelle;membrane-bounded vesicle;nuc…
31.4173	32.1321	31.2705	30.4511	20	20	20	40.6	40.6	40.6	54.831	0	168.16	9566400000	71	0.629295	0.6526	0.913897	1.41976	-	-	O70475	O70475	UDP-glucose 6-dehydrogenase	Ugdh	Ugdh	alcohol metabolic process;anatomical structure morphogenesis;biosynthetic process;carbohydrate biosynthetic process;carbohydrate metabolic process;carboxylic acid biosynthetic process;carboxylic acid metabolic process;cellular biosynthetic process;cellular carbohydrate metabolic process;cellular ketone metabolic process;cellular metabolic process;cellular process;developmental process;embryonic m…	binding;catalytic activity;coenzyme binding;cofactor binding;NAD binding;nucleotide binding;oxidoreductase activity;oxidoreductase activity, acting on CH-OH group of donors;oxidoreductase activity, acting on the CH-OH group of donors, NAD or NADP as acceptor;UDP-glucose 6-dehydrogenase activity	cell part;extracellular membrane-bounded organelle;extracellular organelle;extracellular region part;extracellular vesicular exosome;intracellular organelle part;intracellular part;membrane-bounded organelle;membrane-bounded vesicle;nuclear part;nucleoplasm;organelle;organelle part;vesicle
32.0564	32.7367	32.6797	31.8858	19	19	16	80.9	80.9	79.6	18.757	0	146.33	17619000000	98	0.0716771	0.985926	0.113802	0.182739	-	-	O70492	O70492	Sorting nexin-3	Snx3	Snx3	biological regulation;biosynthetic process;cation transport;cellular biosynthetic process;cellular component organization;cellular component organization at cellular level;cellular component organization or biogenesis;cellular component organization or biogenesis at cellular level;cellular macromolecule biosynthetic process;cellular macromolecule metabolic process;cellular membrane organization;c…	binding;enzyme binding;lipid binding;phosphatase binding;phosphatidylinositol binding;phosphatidylinositol-3,5-bisphosphate binding;phosphatidylinositol-3-phosphate binding;phosphatidylinositol-4-phosphate binding;phosphatidylinositol-5-phosphate binding;phospholipid binding;protein binding;protein phosphatase binding	cell part;clathrin-coated vesicle;coated vesicle;cytoplasm;cytoplasmic membrane-bounded vesicle;cytoplasmic part;cytoplasmic vesicle;cytosol;early endosome;early endosome membrane;early phagosome;endocytic vesicle;endosomal part;endosome;endosome membrane;extracellular membrane-bounded organelle;extracellular organelle;extracellular region part;extracellular vesicular exosome;extrinsic to membran…
32.8676	33.6049	33.0921	32.8907	16	13	13	66.1	64.8	64.8	19.116	0	199.17	29700000000	86	0.231109	0.92971	0.244841	0.507802	-	-	O70493	O70493	Sorting nexin-12	Snx12	Snx12	biological regulation;cellular component organization;cellular component organization at cellular level;cellular component organization or biogenesis;cellular component organization or biogenesis at cellular level;cellular membrane organization;cellular process;endocytosis;establishment of localization;establishment of protein localization;membrane invagination;membrane organization;negative regu…	binding;enzyme binding;lipid binding;phosphatidylinositol binding;phospholipid binding;protein binding	cell part;cytoplasmic part;early endosome;endosome;extracellular membrane-bounded organelle;extracellular organelle;extracellular region part;extracellular vesicular exosome;extrinsic to membrane;intracellular membrane-bounded organelle;intracellular organelle;intracellular part;membrane part;membrane-bounded organelle;membrane-bounded vesicle;organelle;vesicle
30.4755	29.342	31.255	28.1751	9	9	9	34.3	34.3	34.3	34.741	0	88.783	4353800000	34	0.0377128	0.99049	0.193682	0.111254	-	-	O70503	O70503	Very-long-chain 3-oxoacyl-CoA reductase	Hsd17b12	Hsd17b12	biological regulation;biosynthetic process;carboxylic acid biosynthetic process;carboxylic acid metabolic process;cellular biosynthetic process;cellular component organization;cellular component organization at cellular level;cellular component organization or biogenesis;cellular component organization or biogenesis at cellular level;cellular hormone metabolic process;cellular ketone metabolic pr…	binding;carbohydrate binding;catalytic activity;collagen binding;estradiol 17-beta-dehydrogenase activity;fibronectin binding;glycosaminoglycan binding;heparin binding;oxidoreductase activity;oxidoreductase activity, acting on CH-OH group of donors;oxidoreductase activity, acting on the CH-OH group of donors, NAD or NADP as acceptor;pattern binding;polysaccharide binding;protein binding;steroid d…	cell part;cytoplasmic part;endoplasmic reticulum membrane;endoplasmic reticulum part;extracellular matrix;extracellular region part;integral to membrane;intracellular organelle part;intracellular part;intrinsic to membrane;membrane;membrane part;organelle membrane;organelle part;proteinaceous extracellular matrix
29.3433	29.7759	28.8172	NaN	14	14	14	14.1	14.1	14.1	124.87	0	59.606	1837600000	31	0	0.968891	0.742348	0	-	-	O70566	O70566	Protein diaphanous homolog 2	Diaph2	Diaph2	actin cytoskeleton organization;actin filament organization;actin filament polymerization;actin filament-based process;actin polymerization or depolymerization;cellular component assembly;cellular component assembly at cellular level;cellular component organization;cellular component organization at cellular level;cellular component organization or biogenesis;cellular component organization or bi…	actin binding;binding;cytoskeletal protein binding;protein binding	-
29.0011	28.2488	29.2125	NaN	6	6	6	10.4	10.4	10.4	105.11	0	13.374	1292000000	11	0	0.968454	-0.587506	0	-	-	O70589	O70589	Peripheral plasma membrane protein CASK	Cask	Cask	biological regulation;calcium ion import;calcium ion transmembrane transport;calcium ion transport;cation transport;cellular process;divalent inorganic cation transport;divalent metal ion transport;establishment of localization;ion transmembrane transport;ion transport;metal ion transport;negative regulation of biological process;negative regulation of cell adhesion;negative regulation of cell pr…	adenyl nucleotide binding;adenyl ribonucleotide binding;ATP binding;binding;catalytic activity;kinase activity;neurexin family protein binding;nucleotide binding;phosphotransferase activity, alcohol group as acceptor;protein binding;protein kinase activity;protein serine/threonine kinase activity;purine nucleotide binding;purine ribonucleoside triphosphate binding;purine ribonucleotide binding;ri…	adherens junction;anchoring junction;basement membrane;basolateral plasma membrane;cell junction;cell part;cell-cell junction;cell-substrate adherens junction;cell-substrate junction;cytoplasm;cytoplasmic part;cytosol;extracellular matrix part;extracellular region part;focal adhesion;intracellular membrane-bounded organelle;intracellular non-membrane-bounded organelle;intracellular organelle;intr…
32.5679	33.7805	33.4224	32.7094	12	12	12	76	76	76	16.534	0	323.31	31500000000	112	0.049732	0.984757	0.108259	0.13476	-	-	O70591	O70591	Prefoldin subunit 2	Pfdn2	Pfdn2	biological regulation;cellular macromolecule metabolic process;cellular metabolic process;cellular process;cellular protein metabolic process;macromolecule metabolic process;metabolic process;positive regulation of biological process;positive regulation of cellular component organization;positive regulation of cellular process;positive regulation of cytoskeleton organization;positive regulation o…	binding;protein binding;protein binding involved in protein folding	cell part;cytoplasm;cytoplasmic part;cytosol;cytosolic part;extracellular membrane-bounded organelle;extracellular organelle;extracellular region part;extracellular vesicular exosome;intracellular membrane-bounded organelle;intracellular non-membrane-bounded organelle;intracellular organelle;intracellular organelle part;intracellular part;macromolecular complex;membrane-bounded organelle;membrane…
31.2129	30.0936	30.3418	32.3903	17	17	17	38.2	38.2	38.2	55.313	0	113.95	7131500000	51	0.219284	0.914132	-0.712794	-0.562508	-	-	O70624	O70624	Myocilin;Myocilin, N-terminal fragment;Myocilin, C-terminal fragment	Myoc	Myoc	anatomical structure development;axon ensheathment;biological regulation;bone development;cell differentiation;cell projection organization;cell surface receptor linked signaling pathway;cellular component organization;cellular component organization at cellular level;cellular component organization or biogenesis;cellular component organization or biogenesis at cellular level;cellular development…	binding;cytoskeletal protein binding;fibronectin binding;frizzled binding;G-protein-coupled receptor binding;myosin binding;myosin light chain binding;protein binding;receptor binding;receptor tyrosine kinase binding	axon part;cell part;cell projection;cell projection part;cilium;cytoplasmic membrane-bounded vesicle;cytoplasmic part;cytoplasmic vesicle;endoplasmic reticulum;extracellular matrix;extracellular membrane-bounded organelle;extracellular organelle;extracellular region part;extracellular space;extracellular vesicular exosome;Golgi apparatus;intracellular membrane-bounded organelle;intracellular orga…
28.5671	28.9902	NaN	NaN	6	6	6	25.8	25.8	25.8	32.921	0	11.464	842420000	11	0	0.968018	NaN	0	-	-	O88271	O88271	Craniofacial development protein 1	Cfdp1	Cfdp1	biological adhesion;biological regulation;cell adhesion;cellular process;developmental process;multicellular organismal development;multicellular organismal process;negative regulation of apoptosis;negative regulation of biological process;negative regulation of cell death;negative regulation of cellular process;negative regulation of fibroblast apoptosis;negative regulation of programmed cell de…	-	basement membrane;cell part;chromosomal part;condensed chromosome kinetochore;extracellular matrix part;extracellular region part;intracellular non-membrane-bounded organelle;intracellular organelle;intracellular organelle part;intracellular part;kinetochore;macromolecular complex;non-membrane-bounded organelle;organelle;organelle part;protein complex
30.966	31.2374	31.7086	31.0783	22	22	22	23.6	23.6	23.6	153.91	0	323.31	8495000000	77	0.31452	0.883338	-0.29174	-0.658413	-	-	O88322	O88322	Nidogen-2	Nid2	Nid2	biological adhesion;cell adhesion;cell-matrix adhesion;cell-substrate adhesion;cellular process	binding;calcium ion binding;cation binding;ion binding;metal ion binding	basement membrane;cell part;cell surface;extracellular matrix;extracellular matrix part;extracellular membrane-bounded organelle;extracellular organelle;extracellular region;extracellular region part;extracellular vesicular exosome;membrane-bounded organelle;membrane-bounded vesicle;organelle;proteinaceous extracellular matrix;vesicle
29.7777	28.8128	30.9385	29.5081	14	14	14	22.7	22.7	22.7	81.462	0	51.645	3154900000	33	0.403881	0.762423	-0.928053	-0.964037	-	-	O88327	O88327	Alpha-catulin	Ctnnal1	Ctnnal1	biological adhesion;biological regulation;cell adhesion;cellular process;cellular response to stimulus;intracellular signal transduction;Ras protein signal transduction;regulation of biological process;regulation of cellular process;response to stimulus;Rho protein signal transduction;signal transduction;small GTPase mediated signal transduction	-	cell part;cytoplasmic part;cytoskeleton;cytosol;intracellular non-membrane-bounded organelle;intracellular organelle;intracellular part;membrane;non-membrane-bounded organelle;organelle;plasma membrane
35.9822	36.3474	35.9652	35.7023	55	55	55	76.9	76.9	76.9	66.406	0	323.31	219320000000	507	0.5545	0.735503	0.331078	1.01885	-	-	O88342	O88342	WD repeat-containing protein 1	Wdr1	Wdr1	actin cytoskeleton organization;actin filament-based process;actomyosin structure organization;biological regulation;cellular chemical homeostasis;cellular component organization;cellular component organization at cellular level;cellular component organization or biogenesis;cellular component organization or biogenesis at cellular level;cellular homeostasis;cellular ion homeostasis;cellular proce…	actin binding;binding;cytoskeletal protein binding;protein binding	actin cytoskeleton;actin filament;cell junction;cell part;cell projection;cytoplasm;cytoskeletal part;cytoskeleton;extracellular membrane-bounded organelle;extracellular organelle;extracellular region part;extracellular vesicular exosome;intracellular non-membrane-bounded organelle;intracellular organelle;intracellular organelle part;intracellular part;macromolecular complex;membrane-bounded orga…
27.5815	28.1351	NaN	NaN	2	2	2	12.9	12.9	12.9	26.713	0	13.791	445740000	3	0	0.967582	NaN	0	-	-	O88384	O88384	Vesicle transport through interaction with t-SNAREs homolog 1B	Vti1b	Vti1b	cellular component organization;cellular component organization at cellular level;cellular component organization or biogenesis;cellular component organization or biogenesis at cellular level;cellular membrane fusion;cellular membrane organization;cellular process;endosome transport;ER to Golgi vesicle-mediated transport;establishment of localization;establishment of localization in cell;establis…	binding;channel inhibitor activity;channel regulator activity;chloride channel inhibitor activity;chloride channel regulator activity;ion channel inhibitor activity;protein binding;SNAP receptor activity;SNARE binding	cell part;coated vesicle membrane;cytoplasm;cytoplasmic part;cytoplasmic vesicle membrane;cytoplasmic vesicle part;endoplasmic reticulum membrane;endoplasmic reticulum part;endosomal part;endosome;endosome membrane;ER to Golgi transport vesicle membrane;Golgi apparatus;integral to membrane;intracellular membrane-bounded organelle;intracellular organelle;intracellular organelle part;intracellular …
35.6667	34.7511	36.0577	34.3163	54	54	53	59.5	59.5	59.5	92.031	0	323.31	147000000000	383	0.00691027	0.997385	0.0219631	0.0202667	-	-	O88398	O88398	Advillin	Avil	Avil	actin cytoskeleton organization;actin filament capping;actin filament organization;actin filament-based process;anatomical structure morphogenesis;biological regulation;cell part morphogenesis;cell projection morphogenesis;cell projection organization;cellular component morphogenesis;cellular component organization;cellular component organization at cellular level;cellular component organization …	actin binding;binding;cytoskeletal protein binding;protein binding	axon;cell part;cell projection;cytoplasm;cytoskeleton;intracellular non-membrane-bounded organelle;intracellular organelle;intracellular part;neuron projection;non-membrane-bounded organelle;organelle
29.3489	30.7984	28.9415	NaN	10	10	10	20.5	20.5	20.5	70.35	0	27.501	2615000000	20	0	0.967147	1.13209	0	-	-	O88428	O88428	Bifunctional 3-phosphoadenosine 5-phosphosulfate synthase 2;Sulfate adenylyltransferase;Adenylyl-sulfate kinase	Papss2	Papss2	3'-phosphoadenosine 5'-phosphosulfate biosynthetic process;3'-phosphoadenosine 5'-phosphosulfate metabolic process;anatomical structure development;biological regulation;biosynthetic process;blood coagulation;bone development;cellular biosynthetic process;cellular metabolic process;cellular nitrogen compound biosynthetic process;cellular nitrogen compound metabolic process;cellular process;coagul…	adenyl nucleotide binding;adenyl ribonucleotide binding;adenylylsulfate kinase activity;adenylyltransferase activity;ATP binding;binding;catalytic activity;kinase activity;nucleotide binding;nucleotidyltransferase activity;phosphotransferase activity, alcohol group as acceptor;purine nucleotide binding;purine ribonucleoside triphosphate binding;purine ribonucleotide binding;ribonucleotide binding…	-
33.0482	32.8637	33.2039	32.0967	38	38	31	60.6	60.6	52.9	61.449	0	323.31	25123000000	133	0.193377	0.942509	0.305639	0.462214	-	-	O88447	O88447	Kinesin light chain 1	Klc1	Klc1	axon cargo transport;cellular component disassembly;cellular component disassembly at cellular level;cellular component movement;cellular component organization;cellular component organization at cellular level;cellular component organization or biogenesis;cellular component organization or biogenesis at cellular level;cellular macromolecular complex disassembly;cellular macromolecular complex su…	catalytic activity;hydrolase activity;hydrolase activity, acting on acid anhydrides;hydrolase activity, acting on acid anhydrides, in phosphorus-containing anhydrides;microtubule motor activity;motor activity;nucleoside-triphosphatase activity;pyrophosphatase activity	axon;cell part;cell projection;cell projection part;ciliary rootlet;cilium part;cytoplasm;cytoplasmic membrane-bounded vesicle;cytoplasmic part;cytoplasmic vesicle;cytoskeletal part;cytosol;growth cone;intracellular membrane-bounded organelle;intracellular organelle;intracellular organelle part;intracellular part;kinesin complex;macromolecular complex;membrane;membrane-bounded organelle;membrane-…
31.4987	31.3721	31.6736	30.6885	21	15	15	37.4	31.9	31.9	66.662	0	210.56	9114000000	62	0.18078	0.952049	0.254309	0.426283	-	-	O88448	O88448	Kinesin light chain 2	Klc2	Klc2	axon cargo transport;cellular component movement;cellular process;cytoskeleton-dependent intracellular transport;establishment of localization;establishment of localization in cell;intracellular transport;microtubule-based movement;microtubule-based process;microtubule-based transport;transport	binding;catalytic activity;cytoskeletal protein binding;hydrolase activity;hydrolase activity, acting on acid anhydrides;hydrolase activity, acting on acid anhydrides, in phosphorus-containing anhydrides;kinesin binding;microtubule motor activity;motor activity;nucleoside-triphosphatase activity;protein binding;pyrophosphatase activity	cell part;cell projection;cell projection part;ciliary rootlet;cilium part;cytoplasm;cytoplasmic part;cytoskeletal part;cytosol;intracellular organelle part;intracellular part;kinesin complex;macromolecular complex;membrane;microtubule;microtubule associated complex;neuron projection;organelle part;protein complex
34.5165	33.8066	34.0859	33.3466	18	18	18	61.3	61.3	61.3	28.463	0	323.31	57457000000	139	0.321947	0.86292	0.445278	0.727061	-	-	O88456;Q9D7J7	O88456	Calpain small subunit 1	Capns1	Capns1	macromolecule metabolic process;metabolic process;primary metabolic process;protein metabolic process;proteolysis	binding;calcium ion binding;calcium-dependent cysteine-type endopeptidase activity;catalytic activity;cation binding;cysteine-type endopeptidase activity;cysteine-type peptidase activity;endopeptidase activity;hydrolase activity;ion binding;metal ion binding;peptidase activity;peptidase activity, acting on L-amino acid peptides	cell part;cytoplasm;cytoplasmic part;cytosol;extracellular membrane-bounded organelle;extracellular organelle;extracellular region part;extracellular vesicular exosome;intracellular part;membrane;membrane-bounded organelle;membrane-bounded vesicle;organelle;plasma membrane;vesicle
31.0099	30.3162	31.9653	30.6715	20	17	17	42.7	39.3	39.3	70.724	0	323.31	7530700000	54	0.331483	0.847284	-0.655361	-0.785814	-	-	O88485	O88485	Cytoplasmic dynein 1 intermediate chain 1	Dync1i1	Dync1i1	cellular component movement;cellular localization;cellular process;cytoskeleton-dependent intracellular transport;establishment of localization;establishment of localization in cell;intracellular transport;localization;metabolic process;microtubule-based movement;microtubule-based process;microtubule-based transport;organelle localization;organelle transport along microtubule;transport;vesicle lo…	binding;catalytic activity;cytoskeletal protein binding;hydrolase activity;hydrolase activity, acting on acid anhydrides;hydrolase activity, acting on acid anhydrides, in phosphorus-containing anhydrides;microtubule binding;microtubule motor activity;motor activity;nucleoside-triphosphatase activity;protein binding;pyrophosphatase activity;spectrin binding;tubulin binding	cell part;chromosomal part;condensed chromosome kinetochore;cytoplasmic dynein complex;cytoplasmic part;cytoskeletal part;dynein complex;endosome;intracellular membrane-bounded organelle;intracellular non-membrane-bounded organelle;intracellular organelle;intracellular organelle part;intracellular part;kinetochore;macromolecular complex;membrane-bounded organelle;microtubule;microtubule associate…
32.7368	33.1983	33.0723	31.8684	24	24	21	50.8	50.8	47.4	68.393	0	323.31	23799000000	97	0.282955	0.88449	0.497158	0.667619	-	-	O88487	O88487	Cytoplasmic dynein 1 intermediate chain 2	Dync1i2	Dync1i2	cellular component movement;cellular process;establishment of localization;microtubule-based movement;microtubule-based process;transport	catalytic activity;hydrolase activity;hydrolase activity, acting on acid anhydrides;hydrolase activity, acting on acid anhydrides, in phosphorus-containing anhydrides;motor activity;nucleoside-triphosphatase activity;pyrophosphatase activity	cell part;cytoplasmic dynein complex;cytoplasmic part;cytoskeletal part;dynein complex;intracellular organelle part;intracellular part;macromolecular complex;microtubule;microtubule associated complex;organelle;organelle part;protein complex;vesicle
31.7532	32.4042	30.2712	31.0337	24	24	24	47.2	47.2	47.2	139.41	0	323.31	10410000000	72	0.980792	0.791937	1.42624	2.37198	-	-	O88492	O88492	Perilipin-4	Plin4	Plin4	-	-	cell part;cytoplasm;cytoplasmic part;intracellular part;lipid particle;membrane;plasma membrane
28.4984	30.0641	26.4682	NaN	9	9	9	29.6	29.6	29.6	47.972	0	59.179	1254100000	18	0	0.966712	2.81302	0	-	-	O88522	O88522	NF-kappa-B essential modulator	Ikbkg	Ikbkg	activation of NF-kappaB-inducing kinase activity;activation of protein kinase activity;B cell homeostasis;biological regulation;biosynthetic process;cellular biosynthetic process;cellular macromolecule biosynthetic process;cellular macromolecule metabolic process;cellular metabolic process;cellular nitrogen compound metabolic process;cellular process;cellular response to stimulus;cellular respons…	binding;cation binding;enzyme binding;identical protein binding;ion binding;K63-linked polyubiquitin binding;metal ion binding;polyubiquitin binding;protein binding;protein dimerization activity;protein domain specific binding;protein heterodimerization activity;protein homodimerization activity;small conjugating protein binding;ubiquitin binding;ubiquitin protein ligase binding	cell part;cytoplasm;cytoplasmic part;cytoskeletal part;cytosolic part;IkappaB kinase complex;intracellular;intracellular membrane-bounded organelle;intracellular non-membrane-bounded organelle;intracellular organelle;intracellular organelle part;intracellular part;macromolecular complex;membrane-bounded organelle;mitotic spindle;non-membrane-bounded organelle;nucleus;organelle;organelle part;prot…
29.6558	30.4149	29.5213	29.712	11	11	11	34.6	34.6	34.6	34.49	0	66.839	3072300000	30	0.40158	0.814338	0.418692	0.852164	-	-	O88531	O88531	Palmitoyl-protein thioesterase 1	Ppt1	Ppt1	adult behavior;adult locomotory behavior;anatomical structure development;associative learning;behavior;biological regulation;brain development;catabolic process;cation homeostasis;cellular catabolic process;cellular cation homeostasis;cellular chemical homeostasis;cellular component organization;cellular component organization at cellular level;cellular component organization or biogenesis;cellu…	acyl-CoA thioesterase activity;catalytic activity;CoA hydrolase activity;hydrolase activity;hydrolase activity, acting on ester bonds;palmitoyl-(protein) hydrolase activity;palmitoyl-CoA hydrolase activity;thiolester hydrolase activity	axon;cell body;cell part;cell projection;clathrin-coated vesicle;coated vesicle;cytoplasmic membrane-bounded vesicle;cytoplasmic part;cytoplasmic vesicle;cytosol;dendrite;extracellular membrane-bounded organelle;extracellular organelle;extracellular region;extracellular region part;extracellular space;extracellular vesicular exosome;Golgi apparatus;intracellular membrane-bounded organelle;intrace…
29.0451	28.5862	29.996	30.645	4	4	4	10.8	10.8	10.8	53.873	0	58.811	3073200000	18	1.19929	0.947782	-1.50488	-3.02546	-	-	O88533	O88533	Aromatic-L-amino-acid decarboxylase	Ddc	Ddc	aging;alcohol biosynthetic process;alcohol metabolic process;alkaloid metabolic process;amine biosynthetic process;amine metabolic process;amine transport;aromatic compound biosynthetic process;benzene-containing compound metabolic process;biosynthetic process;carboxylic acid metabolic process;catecholamine biosynthetic process;catecholamine metabolic process;catechol-containing compound biosynth…	amine binding;amino acid binding;aromatic-L-amino-acid decarboxylase activity;binding;carbon-carbon lyase activity;carboxylic acid binding;carboxy-lyase activity;catalytic activity;cofactor binding;enzyme binding;lyase activity;protein binding;pyridoxal phosphate binding;vitamin B6 binding;vitamin binding	axon;cell body;cell part;cell projection;clathrin-coated vesicle;coated vesicle;cytoplasm;cytoplasmic membrane-bounded vesicle;cytoplasmic part;cytoplasmic vesicle;extracellular membrane-bounded organelle;extracellular organelle;extracellular region part;extracellular vesicular exosome;intracellular membrane-bounded organelle;intracellular organelle;intracellular part;membrane-bounded organelle;m…
31.5158	32.0313	31.8315	31.7985	14	14	14	42.6	42.6	42.6	47.832	0	323.31	11565000000	87	0.0519282	0.988471	-0.0414333	-0.115635	-	-	O88543	O88543	COP9 signalosome complex subunit 3	Cops3	Cops3	catabolic process;cellular catabolic process;cellular macromolecule catabolic process;cellular macromolecule metabolic process;cellular metabolic process;cellular process;cellular protein metabolic process;chordate embryonic development;cullin deneddylation;developmental process;embryo development;embryo development ending in birth or egg hatching;in utero embryonic development;macromolecule cata…	-	cell part;cytoplasm;intracellular membrane-bounded organelle;intracellular organelle;intracellular organelle part;intracellular part;macromolecular complex;membrane-bounded organelle;nuclear part;nucleoplasm;nucleus;organelle;organelle part;protein complex;signalosome
33.0509	33.0708	33.2716	33.2017	29	29	29	79.3	79.3	79.3	46.284	0	323.31	30806000000	156	1.39662	0.668529	-0.175772	-1.2895	-	-	O88544	O88544	COP9 signalosome complex subunit 4	Cops4	Cops4	cellular macromolecule metabolic process;cellular metabolic process;cellular process;cellular protein metabolic process;cullin deneddylation;macromolecule metabolic process;macromolecule modification;metabolic process;primary metabolic process;protein deneddylation;protein metabolic process;protein modification by small protein conjugation or removal;protein modification by small protein removal;…	-	cell junction;cell part;clathrin-coated vesicle;coated vesicle;cytoplasmic membrane-bounded vesicle;cytoplasmic part;cytoplasmic vesicle;extracellular membrane-bounded organelle;extracellular organelle;extracellular region part;extracellular vesicular exosome;intracellular membrane-bounded organelle;intracellular organelle;intracellular organelle part;intracellular part;macromolecular complex;mem…
31.5018	31.6066	31.4621	31.9166	11	11	11	39.5	39.5	39.5	35.88	0	229.49	10960000000	66	0.20699	0.95899	-0.13513	-0.405525	-	-	O88545	O88545	COP9 signalosome complex subunit 6	Cops6	Cops6	cellular macromolecule metabolic process;cellular metabolic process;cellular process;cellular protein metabolic process;cullin deneddylation;macromolecule metabolic process;macromolecule modification;metabolic process;primary metabolic process;protein deneddylation;protein metabolic process;protein modification by small protein conjugation or removal;protein modification by small protein removal;…	-	cell part;cytoplasm;extracellular membrane-bounded organelle;extracellular organelle;extracellular region part;extracellular vesicular exosome;intracellular organelle part;intracellular part;macromolecular complex;membrane-bounded organelle;membrane-bounded vesicle;nuclear part;nucleoplasm;organelle;organelle part;protein complex;signalosome;vesicle
35.5922	35.1804	35.0581	34.2486	33	33	33	78.5	78.5	78.5	37.402	0	323.31	114800000000	246	0.60576	0.665281	0.732939	1.32272	-	-	O88569	O88569	Heterogeneous nuclear ribonucleoproteins A2/B1	Hnrnpa2b1	Hnrnpa2b1	biological regulation;cellular macromolecule metabolic process;cellular metabolic process;cellular nitrogen compound metabolic process;cellular process;establishment of localization;establishment of RNA localization;macromolecule metabolic process;metabolic process;mRNA metabolic process;mRNA processing;negative regulation of biological process;negative regulation of biosynthetic process;negative…	binding;DNA binding;nucleic acid binding;nucleotide binding;RNA binding;sequence-specific DNA binding;single-stranded DNA binding;single-stranded telomeric DNA binding;structure-specific DNA binding;telomeric DNA binding	catalytic step 2 spliceosome;cell part;cytoplasm;intracellular membrane-bounded organelle;intracellular organelle;intracellular organelle part;intracellular part;macromolecular complex;membrane;membrane-bounded organelle;nuclear part;nucleoplasm;nucleus;organelle;organelle part;ribonucleoprotein complex;spliceosomal complex
30.7478	31.5605	30.3149	28.9503	9	9	9	45.3	45.3	45.3	29.486	0	159.14	5598500000	28	0.708958	0.678907	1.52147	1.70158	-	-	O88587	O88587	Catechol O-methyltransferase	Comt	Comt	alcohol catabolic process;alcohol metabolic process;amine catabolic process;amine metabolic process;behavior;benzene-containing compound metabolic process;biological regulation;catabolic process;catecholamine catabolic process;catecholamine metabolic process;catechol-containing compound catabolic process;catechol-containing compound metabolic process;cell communication;cellular amine metabolic pr…	binding;catalytic activity;catechol O-methyltransferase activity;cation binding;ion binding;magnesium ion binding;metal ion binding;methyltransferase activity;O-methyltransferase activity;S-adenosylmethionine-dependent methyltransferase activity;transferase activity;transferase activity, transferring one-carbon groups	axon;cell body;cell part;cell projection;cell projection part;cytoplasmic part;cytosol;dendritic spine;extracellular membrane-bounded organelle;extracellular organelle;extracellular region part;extracellular vesicular exosome;integral to membrane;intracellular membrane-bounded organelle;intracellular organelle;intracellular part;intrinsic to membrane;membrane;membrane part;membrane-bounded organe…	+
NaN	NaN	25.4742	24.9069	4	4	4	4.7	4.7	4.7	109.32	0.0095115	1.0814	237320000	2	0	0.966277	NaN	0	-	-	O88622	O88622	Poly(ADP-ribose) glycohydrolase	Parg	Parg	carbohydrate metabolic process;cellular process;cellular response to stimulus;cellular response to stress;detection of bacterium;detection of biotic stimulus;detection of external stimulus;detection of stimulus;metabolic process;multi-organism process;primary metabolic process;response to bacterium;response to biotic stimulus;response to DNA damage stimulus;response to external stimulus;response …	catalytic activity;hydrolase activity;hydrolase activity, acting on glycosyl bonds;hydrolase activity, hydrolyzing O-glycosyl compounds;poly(ADP-ribose) glycohydrolase activity	cell part;cytoplasm;cytoplasmic part;cytosol;intracellular membrane-bounded organelle;intracellular organelle;intracellular organelle part;intracellular part;membrane-bounded organelle;nuclear part;nucleoplasm;nucleus;organelle;organelle part
29.9297	30.2645	31.3078	30.0355	22	16	12	41.8	32.1	25	60.736	0	92.624	4763000000	50	0.323735	0.861151	-0.574539	-0.758169	-	-	O88643	O88643	Serine/threonine-protein kinase PAK 1	Pak1	Pak1	actin cytoskeleton organization;actin cytoskeleton reorganization;actin filament-based process;activation of protein kinase activity;anatomical structure development;anatomical structure morphogenesis;apoptosis;biological regulation;branching morphogenesis of a tube;cell death;cell migration;cell motility;cell projection organization;cellular component movement;cellular component organization;cel…	adenyl nucleotide binding;adenyl ribonucleotide binding;ATP binding;binding;catalytic activity;collagen binding;enzyme binding;GTPase binding;kinase activity;nucleotide binding;phosphotransferase activity, alcohol group as acceptor;protein binding;protein kinase activity;protein serine/threonine kinase activity;purine nucleotide binding;purine ribonucleoside triphosphate binding;purine ribonucleo…	adherens junction;anchoring junction;axon;cell junction;cell part;cell projection;cell projection membrane;cell projection part;cell-cell junction;cell-substrate adherens junction;cell-substrate junction;cytoplasm;cytoplasmic part;dendrite;focal adhesion;Golgi apparatus;growth cone;intracellular membrane-bounded organelle;intracellular organelle;intracellular part;leading edge membrane;macromolec…
29.1873	28.9126	27.8615	28.5824	3	3	3	41.1	41.1	41.1	13.553	0	25.706	1492400000	15	0.782705	0.680434	0.827993	1.7047	-	-	O88653	O88653	Ragulator complex protein LAMTOR3	Lamtor3	Lamtor3	biological regulation;cellular localization;cellular macromolecule localization;cellular process;cellular protein localization;cellular response to acid;cellular response to amine stimulus;cellular response to amino acid stimulus;cellular response to chemical stimulus;cellular response to endogenous stimulus;cellular response to organic nitrogen;cellular response to organic substance;cellular res…	-	cell part;cytoplasmic part;endosomal part;endosome;intracellular membrane-bounded organelle;intracellular organelle;intracellular organelle part;intracellular part;late endosome;macromolecular complex;membrane part;membrane-bounded organelle;organelle;organelle part;protein complex;Ragulator complex
32.3254	33.0729	32.4611	32.6528	35	35	35	81.9	81.9	81.9	49.548	0	323.31	21587000000	155	0.126275	0.975515	0.142273	0.292843	-	-	O88685	O88685	26S protease regulatory subunit 6A	Psmc3	Psmc3	anatomical structure development;biological regulation;blastocyst development;catabolic process;cellular catabolic process;cellular macromolecule catabolic process;cellular macromolecule metabolic process;cellular metabolic process;cellular process;developmental process;ER-associated protein catabolic process;macromolecule catabolic process;macromolecule metabolic process;metabolic process;modifi…	adenyl nucleotide binding;adenyl ribonucleotide binding;ATP binding;binding;nucleotide binding;protein binding;purine nucleotide binding;purine ribonucleoside triphosphate binding;purine ribonucleotide binding;ribonucleotide binding;TBP-class protein binding;transcription factor binding	cell part;cytoplasmic mRNA processing body;cytoplasmic part;cytosolic part;cytosolic proteasome complex;intracellular membrane-bounded organelle;intracellular non-membrane-bounded organelle;intracellular organelle;intracellular organelle part;intracellular part;macromolecular complex;membrane;membrane-bounded organelle;non-membrane-bounded organelle;nuclear part;nuclear proteasome complex;nucleus…
29.7979	29.2906	30.6646	31.6499	7	7	7	26.1	26.1	26.1	29.8	0	24.722	4215600000	19	0.997703	0.799965	-1.61301	-2.46594	-	-	O88696	O88696	ATP-dependent Clp protease proteolytic subunit, mitochondrial	Clpp	Clpp	cellular component assembly;cellular component organization;cellular component organization or biogenesis;macromolecular complex assembly;macromolecular complex subunit organization;macromolecule metabolic process;metabolic process;misfolded or incompletely synthesized protein catabolic process;primary metabolic process;protein complex assembly;protein complex subunit organization;protein homooli…	catalytic activity;endopeptidase activity;hydrolase activity;peptidase activity;peptidase activity, acting on L-amino acid peptides;serine hydrolase activity;serine-type endopeptidase activity;serine-type peptidase activity	cell part;cytoplasmic part;endopeptidase Clp complex;intracellular membrane-bounded organelle;intracellular organelle;intracellular organelle lumen;intracellular organelle part;intracellular part;macromolecular complex;membrane-bounded organelle;membrane-enclosed lumen;mitochondrial matrix;mitochondrial part;mitochondrion;organelle;organelle lumen;organelle part;protein complex	+
31.5552	31.7467	32.1958	32.032	12	12	7	28.3	28.3	20	47.744	0	44.293	12935000000	54	1.17575	0.688398	-0.462943	-2.04867	-	-	O88712	O88712	C-terminal-binding protein 1	Ctbp1	Ctbp1	biological regulation;cell differentiation;cellular component organization;cellular component organization at cellular level;cellular component organization or biogenesis;cellular component organization or biogenesis at cellular level;cellular developmental process;cellular process;developmental process;fat cell differentiation;Golgi organization;negative regulation of biological process;negative…	binding;catalytic activity;coenzyme binding;cofactor binding;NAD binding;nucleic acid binding transcription factor activity;nucleotide binding;oxidoreductase activity;oxidoreductase activity, acting on CH-OH group of donors;oxidoreductase activity, acting on the CH-OH group of donors, NAD or NADP as acceptor;protein binding;protein binding transcription factor activity;protein domain specific bin…	cell part;cytoplasmic part;cytosol;intracellular membrane-bounded organelle;intracellular organelle;intracellular organelle part;intracellular part;macromolecular complex;membrane-bounded organelle;nuclear part;nucleoplasm;nucleoplasm part;nucleus;organelle;organelle part;protein complex;transcription factor complex;transcriptional repressor complex
28.3074	28.8731	NaN	NaN	8	8	8	3.7	3.7	3.7	532.16	0	20.775	709110000	12	0	0.965843	NaN	0	-	-	O88738	O88738	Baculoviral IAP repeat-containing protein 6	Birc6	Birc6	anatomical structure development;apoptosis;biological regulation;cell cycle phase;cell cycle process;cell death;cell division;cellular component organization;cellular component organization at cellular level;cellular component organization or biogenesis;cellular component organization or biogenesis at cellular level;cellular macromolecule metabolic process;cellular metabolic process;cellular proc…	acid-amino acid ligase activity;catalytic activity;cysteine-type endopeptidase inhibitor activity;endopeptidase inhibitor activity;endopeptidase regulator activity;enzyme inhibitor activity;enzyme regulator activity;ligase activity;ligase activity, forming carbon-nitrogen bonds;peptidase inhibitor activity;peptidase regulator activity;small conjugating protein ligase activity;ubiquitin-protein li…	cell part;cytoplasm;cytoplasmic part;cytoskeletal part;endosome;Golgi apparatus part;intracellular membrane-bounded organelle;intracellular organelle;intracellular organelle part;intracellular part;membrane;membrane-bounded organelle;microtubule organizing center;midbody;organelle;organelle part;spindle pole;trans-Golgi network
30.2237	30.2052	29.9385	30.6003	20	20	20	57.5	57.5	57.5	54.325	0	118.8	4125800000	62	0.0537915	0.986108	-0.0549126	-0.127396	-	-	O88746	O88746	Target of Myb protein 1	Tom1	Tom1	establishment of localization;establishment of localization in cell;establishment of protein localization;intracellular protein transport;intracellular transport;protein transport;transport	binding;clathrin binding;protein binding	cell part;cytoplasm;cytoplasmic part;cytosol;early endosome;endosome;extracellular membrane-bounded organelle;extracellular organelle;extracellular region part;extracellular vesicular exosome;intracellular membrane-bounded organelle;intracellular organelle;intracellular part;membrane;membrane-bounded organelle;membrane-bounded vesicle;organelle;vesicle
35.7722	35.4804	35.9499	35.4098	51	51	48	85	85	82.9	46.674	0	323.31	176540000000	420	0.0567227	0.985274	-0.0535545	-0.131597	-	-	O88844	O88844	Isocitrate dehydrogenase [NADP] cytoplasmic	Idh1	Idh1	2-oxoglutarate metabolic process;acetyl-CoA catabolic process;acetyl-CoA metabolic process;amine metabolic process;anatomical structure development;biological regulation;carbohydrate metabolic process;carboxylic acid metabolic process;catabolic process;cellular aldehyde metabolic process;cellular amine metabolic process;cellular amino acid metabolic process;cellular carbohydrate metabolic process…	binding;catalytic activity;cation binding;coenzyme binding;cofactor binding;identical protein binding;ion binding;isocitrate dehydrogenase (NADP+) activity;isocitrate dehydrogenase activity;magnesium ion binding;metal ion binding;NAD binding;NADP binding;nucleotide binding;oxidoreductase activity;oxidoreductase activity, acting on CH-OH group of donors;oxidoreductase activity, acting on the CH-OH…	cell part;cytoplasm;cytoplasmic part;cytosol;extracellular membrane-bounded organelle;extracellular organelle;extracellular region part;extracellular vesicular exosome;intracellular membrane-bounded organelle;intracellular organelle;intracellular part;membrane-bounded organelle;membrane-bounded vesicle;microbody;mitochondrion;organelle;peroxisome;vesicle	+
32.1505	32.1009	31.7656	32.1232	16	16	16	84.4	84.4	84.4	20.911	0	158.96	13991000000	81	0.375706	0.884369	0.181252	0.646215	-	-	O88851	O88851	Putative hydrolase RBBP9	Rbbp9	Rbbp9	biological regulation;regulation of biological process;regulation of cell proliferation;regulation of cellular process	catalytic activity;hydrolase activity	cell part;cytoplasm;extracellular membrane-bounded organelle;extracellular organelle;extracellular region part;extracellular vesicular exosome;intracellular membrane-bounded organelle;intracellular non-membrane-bounded organelle;intracellular organelle;intracellular organelle part;intracellular part;membrane-bounded organelle;membrane-bounded vesicle;non-membrane-bounded organelle;nuclear part;nu…
30.7737	29.8417	31.0426	30.9292	17	17	15	31.3	31.3	28.8	74.096	0	119.12	5557500000	56	0.544594	0.67383	-0.678192	-1.19106	-	-	O88935	O88935	Synapsin-1	Syn1	Syn1	biological regulation;cellular process;establishment of localization;establishment of localization in cell;neurotransmitter secretion;neurotransmitter transport;regulation of biological process;regulation of biological quality;regulation of cell communication;regulation of cellular process;regulation of multicellular organismal process;regulation of neurological system process;regulation of neuro…	adenyl nucleotide binding;adenyl ribonucleotide binding;ATP binding;binding;catalytic activity;enzyme binding;kinase binding;nucleotide binding;protein binding;protein kinase binding;purine nucleotide binding;purine ribonucleoside triphosphate binding;purine ribonucleotide binding;ribonucleotide binding	cell junction;cell part;cell projection;clathrin-coated vesicle;coated vesicle;cytoplasmic membrane-bounded vesicle;cytoplasmic part;cytoplasmic vesicle;cytosol;dendrite;Golgi apparatus;intracellular membrane-bounded organelle;intracellular organelle;intracellular part;membrane-bounded organelle;membrane-bounded vesicle;myelin sheath;neuron projection;organelle;synapse part;synaptic vesicle;vesic…
28.1073	27.2826	NaN	NaN	3	3	3	8.5	8.5	8.5	54.017	0	38.238	519180000	6	0	0.965409	NaN	0	-	-	O88947	O88947	Coagulation factor X;Factor X light chain;Factor X heavy chain;Activated factor Xa heavy chain	F10	F10	biological regulation;blood coagulation;coagulation;hemostasis;multicellular organismal process;positive regulation of biological process;positive regulation of cell communication;positive regulation of cellular process;positive regulation of intracellular protein kinase cascade;positive regulation of protein kinase B signaling cascade;positive regulation of response to stimulus;positive regulati…	binding;calcium ion binding;catalytic activity;cation binding;endopeptidase activity;hydrolase activity;ion binding;lipid binding;metal ion binding;peptidase activity;peptidase activity, acting on L-amino acid peptides;phospholipid binding;serine hydrolase activity;serine-type endopeptidase activity;serine-type peptidase activity	extracellular region
31.3523	31.262	32.0138	30.6372	11	11	8	56.3	56.3	43.7	21.834	0	106.99	10443000000	45	0.00823738	0.996939	-0.0183315	-0.0232107	-	-	O88952;Q8JZS0	O88952	Protein lin-7 homolog C	Lin7c	Lin7c	anatomical structure development;anatomical structure morphogenesis;asymmetric protein localization;biological regulation;cellular process;developmental process;establishment of localization;establishment of localization in cell;establishment of protein localization;establishment or maintenance of apical/basal cell polarity;establishment or maintenance of bipolar cell polarity;establishment or ma…	binding;cytoskeletal protein binding;L27 domain binding;protein binding;protein domain specific binding	basolateral plasma membrane;cell junction;cell part;cell projection;cell-cell junction;cytoplasm;cytoskeletal part;extracellular membrane-bounded organelle;extracellular organelle;extracellular region part;extracellular vesicular exosome;intracellular organelle part;intracellular part;macromolecular complex;membrane;membrane part;membrane-bounded organelle;membrane-bounded vesicle;MPP7-DLG1-LIN7 …
31.1402	31.5883	31.2111	31.3525	14	14	12	60.6	60.6	52.6	32.549	0	133	8275000000	66	0.119706	0.976009	0.0824718	0.24623	-	-	O88958	O88958	Glucosamine-6-phosphate isomerase 1	Gnpda1	Gnpda1	acrosome reaction;alcohol biosynthetic process;alcohol catabolic process;alcohol metabolic process;amino sugar catabolic process;amino sugar metabolic process;biosynthetic process;calcium ion-dependent exocytosis;carbohydrate biosynthetic process;carbohydrate catabolic process;carbohydrate metabolic process;catabolic process;cellular biosynthetic process;cellular carbohydrate biosynthetic process…	catalytic activity;deaminase activity;glucosamine-6-phosphate deaminase activity;hydrolase activity;intramolecular oxidoreductase activity;intramolecular oxidoreductase activity, interconverting aldoses and ketoses;isomerase activity	cell part;cytoplasm;extracellular membrane-bounded organelle;extracellular organelle;extracellular region part;extracellular vesicular exosome;intracellular part;membrane-bounded organelle;membrane-bounded vesicle;organelle;vesicle
26.1928	27.8274	NaN	NaN	5	5	5	16.3	16.3	16.3	47.585	0	20.736	336940000	8	0	0.964975	NaN	0	-	-	O88968	O88968	Transcobalamin-2	Tcn2	Tcn2	cation transport;cellular metabolic process;cellular process;cobalamin metabolic process;cobalamin transport;cobalt ion transport;cofactor metabolic process;divalent inorganic cation transport;establishment of localization;heterocycle metabolic process;ion transport;metabolic process;metal ion transport;nitrogen compound metabolic process;porphyrin-containing compound metabolic process;small mole…	binding;cation binding;cobalamin binding;ion binding;metal ion binding;tetrapyrrole binding;vitamin binding	extracellular membrane-bounded organelle;extracellular organelle;extracellular region part;extracellular vesicular exosome;membrane-bounded organelle;membrane-bounded vesicle;organelle;vesicle
29.9661	29.4537	NaN	NaN	2	2	2	15.3	15.3	15.3	26.925	0	3.7103	1769400000	3	0	0.964542	NaN	0	-	-	O88983	O88983	Syntaxin-8	Stx8	Stx8	cellular component organization;cellular component organization at cellular level;cellular component organization or biogenesis;cellular component organization or biogenesis at cellular level;cellular membrane fusion;cellular membrane organization;cellular process;early endosome to late endosome transport;endosome to lysosome transport;endosome transport;establishment of localization;establishmen…	binding;channel inhibitor activity;channel regulator activity;chloride channel inhibitor activity;chloride channel regulator activity;enzyme binding;ion channel inhibitor activity;protein binding;SNAP receptor activity;SNARE binding;syntaxin binding;ubiquitin protein ligase binding	cell part;cytoplasmic part;early endosome;endosomal part;endosome;endosome membrane;Golgi apparatus part;integral to membrane;intracellular membrane-bounded organelle;intracellular organelle;intracellular organelle part;intracellular part;intrinsic to membrane;late endosome;late endosome membrane;lysosomal membrane;macromolecular complex;membrane;membrane part;membrane-bounded organelle;organelle…
28.3213	28.5213	28.8982	NaN	6	6	6	14.9	14.9	14.9	44.93	0	16.645	1190400000	11	0	0.964109	-0.476964	0	-	-	O88986	O88986	2-amino-3-ketobutyrate coenzyme A ligase, mitochondrial	Gcat	Gcat	amine catabolic process;amine metabolic process;aspartate family amino acid catabolic process;aspartate family amino acid metabolic process;biosynthetic process;carboxylic acid catabolic process;carboxylic acid metabolic process;catabolic process;cellular amine metabolic process;cellular amino acid catabolic process;cellular amino acid metabolic process;cellular catabolic process;cellular ketone …	acetyltransferase activity;binding;C-acetyltransferase activity;C-acyltransferase activity;catalytic activity;cofactor binding;glycine C-acetyltransferase activity;pyridoxal phosphate binding;transferase activity;transferase activity, transferring acyl groups;transferase activity, transferring acyl groups other than amino-acyl groups;vitamin B6 binding;vitamin binding	cell part;cytoplasmic part;intracellular membrane-bounded organelle;intracellular organelle;intracellular organelle part;intracellular part;membrane-bounded organelle;mitochondrion;nuclear part;nucleoplasm;organelle;organelle part	+
29.3533	28.4607	30.0692	33.2835	44	35	31	55.9	48.6	45.3	103.04	0	257.23	8079100000	75	0.622092	0.670268	-2.76931	-1.56639	-	-	O88990	O88990	Alpha-actinin-3	Actn3	Actn3	multicellular organismal process;muscle contraction;muscle system process;system process	actin binding;actin filament binding;binding;binding, bridging;calcium ion binding;cation binding;cytoskeletal protein binding;identical protein binding;ion binding;metal ion binding;protein binding;protein binding, bridging;protein dimerization activity;protein homodimerization activity	brush border;cell part;cell projection;contractile fiber part;cytoplasmic part;cytoskeletal part;intracellular organelle part;intracellular part;organelle part;sarcomere;striated muscle thin filament;Z disc
28.1474	30.2559	NaN	NaN	3	3	3	7.6	7.6	7.6	49.372	1	-2	1391300000	4	0	0.963677	NaN	0	-	-	O89017	O89017	Legumain	Lgmn	Lgmn	biological regulation;catabolic process;cellular catabolic process;cellular macromolecule metabolic process;cellular metabolic process;cellular process;macromolecule catabolic process;macromolecule metabolic process;metabolic process;multicellular organismal process;negative regulation of apoptosis;negative regulation of biological process;negative regulation of cell death;negative regulation of …	catalytic activity;cysteine-type endopeptidase activity;cysteine-type peptidase activity;endopeptidase activity;hydrolase activity;peptidase activity;peptidase activity, acting on L-amino acid peptides	apical part of cell;cell part;cytoplasmic part;endosome;extracellular membrane-bounded organelle;extracellular organelle;extracellular region part;extracellular vesicular exosome;intracellular membrane-bounded organelle;intracellular organelle;intracellular part;late endosome;lysosome;lytic vacuole;membrane-bounded organelle;membrane-bounded vesicle;organelle;vacuole;vesicle
33.8229	32.5381	33.2994	32.6024	19	19	19	31.4	31.4	31.4	69.378	0	197.02	32020000000	116	0.106165	0.971698	0.229609	0.276361	-	-	O89020;CON__REFSEQ:XP_585019	O89020	Afamin	Afm	Afm	establishment of localization;transport;vitamin transport	binding;vitamin binding;vitamin E binding	blood microparticle;extracellular membrane-bounded organelle;extracellular organelle;extracellular region part;extracellular space;extracellular vesicular exosome;membrane-bounded organelle;membrane-bounded vesicle;organelle;vesicle
29.4748	30.5513	NaN	28.2648	3	3	3	6.2	6.2	6.2	61.341	0	7.1477	2285600000	9	0	0.963245	1.74823	0	-	-	O89023	O89023	Tripeptidyl-peptidase 1	Tpp1	Tpp1	anatomical structure development;anatomical structure homeostasis;biological regulation;bone resorption;catabolic process;cell differentiation;cellular catabolic process;cellular component organization;cellular component organization at cellular level;cellular component organization or biogenesis;cellular component organization or biogenesis at cellular level;cellular developmental process;cellul…	binding;catalytic activity;cation binding;endopeptidase activity;exopeptidase activity;hydrolase activity;ion binding;metal ion binding;peptidase activity;peptidase activity, acting on L-amino acid peptides;serine hydrolase activity;serine-type endopeptidase activity;serine-type peptidase activity;tripeptidyl-peptidase activity	cell part;cytoplasmic membrane-bounded vesicle;cytoplasmic part;cytoplasmic vesicle;extracellular membrane-bounded organelle;extracellular organelle;extracellular region part;extracellular vesicular exosome;intracellular membrane-bounded organelle;intracellular organelle;intracellular part;lysosome;lytic vacuole;melanosome;membrane-bounded organelle;membrane-bounded vesicle;mitochondrion;organell…
28.7422	29.9942	28.4916	NaN	9	9	9	10	10	10	124.2	0	34.188	1497900000	15	0	0.962814	0.876567	0	-	-	O89032	O89032	SH3 and PX domain-containing protein 2A	Sh3pxd2a	Sh3pxd2a	anatomical structure formation involved in morphogenesis;cellular metabolic process;cellular process;developmental process;metabolic process;osteoclast fusion;reactive oxygen species metabolic process;superoxide metabolic process;syncytium formation;syncytium formation by plasma membrane fusion	binding;lipid binding;phosphatidylinositol binding;phospholipid binding	cell junction;cell part;cell projection;cytoplasm;cytoskeletal part;intracellular non-membrane-bounded organelle;intracellular organelle;intracellular organelle part;intracellular part;macromolecular complex;non-membrane-bounded organelle;organelle;organelle part;podosome;protein complex
33.8284	33.7835	33.7495	32.7791	26	24	24	47.1	44	44	50.989	0	228.87	41780000000	114	0.419327	0.782657	0.54166	0.924829	-	-	O89053	O89053	Coronin-1A	Coro1a	Coro1a	actin cytoskeleton organization;actin filament organization;actin filament-based process;anatomical structure homeostasis;biological adhesion;biological regulation;calcium ion transport;cation transport;cell adhesion;cell chemotaxis;cell migration;cell motility;cell projection organization;cell-substrate adhesion;cellular component assembly;cellular component assembly at cellular level;cellular c…	actin binding;actin filament binding;binding;cytoskeletal protein binding;enzyme binding;identical protein binding;kinase binding;phosphatidylinositol 3-kinase binding;protein binding;protein C-terminus binding;protein dimerization activity;protein homodimerization activity	actin filament;axon;cell cortex part;cell junction;cell leading edge;cell part;cell projection;cell-cell junction;cortical actin cytoskeleton;cortical cytoskeleton;cytoplasm;cytoplasmic membrane-bounded vesicle;cytoplasmic part;cytoplasmic vesicle;cytoplasmic vesicle membrane;cytoplasmic vesicle part;cytoskeletal part;cytoskeleton;early endosome;endocytic vesicle;endocytic vesicle membrane;endoso…
31.1054	32.2227	30.8551	30.2912	11	11	11	39.6	39.6	39.6	34.567	0	93.251	8946000000	65	0.650879	0.662896	1.09088	1.50302	-	-	O89079	O89079	Coatomer subunit epsilon	Cope	Cope	cellular process;ER to Golgi vesicle-mediated transport;establishment of localization;establishment of localization in cell;establishment of protein localization;Golgi vesicle transport;intracellular transport;intra-Golgi vesicle-mediated transport;protein transport;retrograde vesicle-mediated transport, Golgi to ER;transport;vesicle-mediated transport	structural molecule activity	cell part;coated vesicle;COPI vesicle coat;COPI-coated vesicle;cytoplasmic membrane-bounded vesicle;cytoplasmic part;cytoplasmic vesicle;cytoplasmic vesicle part;Golgi apparatus;Golgi apparatus part;Golgi-associated vesicle;intracellular membrane-bounded organelle;intracellular organelle;intracellular organelle part;intracellular part;macromolecular complex;membrane coat;membrane part;membrane-bo…
33.0637	34.5114	32.4895	32.9594	12	12	12	79.7	79.7	79.7	16.604	0	323.31	38728000000	94	0.526855	0.663965	1.06309	1.23465	-	-	O89086	O89086	RNA-binding protein 3	Rbm3	Rbm3	biological regulation;biosynthetic process;cellular biosynthetic process;cellular macromolecule biosynthetic process;cellular macromolecule metabolic process;cellular metabolic process;cellular nitrogen compound metabolic process;cellular process;cellular protein metabolic process;cellular response to chemical stimulus;cellular response to dsRNA;cellular response to organic substance;cellular res…	binding;nucleotide binding;ribonucleoprotein binding;ribosomal large subunit binding	cell part;cell projection;cytoplasm;dendrite;intracellular membrane-bounded organelle;intracellular organelle;intracellular part;membrane-bounded organelle;neuron projection;nucleus;organelle
28.0721	28.5957	NaN	NaN	6	6	6	14.6	14.6	14.6	55.356	0	14.383	571350000	9	0	0.962382	NaN	0	-	-	O89110	O89110	Caspase-8;Caspase-8 subunit p18;Caspase-8 subunit p10	Casp8	Casp8	activation of caspase activity;anatomical structure development;anatomical structure formation involved in morphogenesis;angiogenesis;apoptosis;biological regulation;cardiac muscle tissue development;cell death;cell differentiation;cellular component assembly;cellular component organization;cellular component organization or biogenesis;cellular developmental process;cellular process;cellular resp…	binding;catalytic activity;cysteine-type endopeptidase activity;cysteine-type endopeptidase activity involved in apoptotic process;cysteine-type peptidase activity;death effector domain binding;endopeptidase activity;enzyme binding;hydrolase activity;peptidase activity;peptidase activity, acting on L-amino acid peptides;protein binding;protein dimerization activity;protein domain specific binding…	CD95 death-inducing signaling complex;cell body;cell part;cell projection;cytoplasm;cytoplasmic part;cytoskeletal part;cytosol;death-inducing signaling complex;intracellular membrane-bounded organelle;intracellular organelle;intracellular organelle part;intracellular part;macromolecular complex;membrane;membrane part;membrane raft;membrane-bounded organelle;microtubule organizing center;mitochond…	+
32.4368	31.279	32.7548	31.6087	15	15	15	31.6	31.6	31.6	45.341	0	57.104	16023000000	58	0.13706	0.96105	-0.323859	-0.354113	-	-	O89112	O89112	LanC-like protein 1	Lancl1	Lancl1	-	amine binding;amino acid binding;binding;carboxylic acid binding;catalytic activity;cation binding;glutathione binding;ion binding;lipoprotein particle receptor binding;low-density lipoprotein particle receptor binding;metal ion binding;modified amino acid binding;peptide binding;protein binding;protein domain specific binding;receptor binding;SH3 domain binding;transition metal ion binding;zinc …	cell part;cytoplasm;extracellular membrane-bounded organelle;extracellular organelle;extracellular region part;extracellular vesicular exosome;intracellular membrane-bounded organelle;intracellular organelle;intracellular part;membrane;membrane-bounded organelle;membrane-bounded vesicle;nucleus;organelle;vesicle
32.9761	32.1414	31.4583	32.488	17	17	17	49.1	49.1	49.1	39.771	0	160.26	18032000000	86	0.327794	0.857176	0.585604	0.767767	-	-	P00329	P00329	Alcohol dehydrogenase 1	Adh1	Adh1	adult behavior;alcohol catabolic process;alcohol metabolic process;behavior;behavioral response to ethanol;biological regulation;carboxylic acid metabolic process;catabolic process;cellular hormone metabolic process;cellular ketone metabolic process;cellular lipid metabolic process;cellular metabolic process;cellular process;diterpenoid metabolic process;ethanol catabolic process;ethanol metaboli…	alcohol dehydrogenase (NAD) activity;binding;catalytic activity;cation binding;identical protein binding;ion binding;metal ion binding;oxidoreductase activity;oxidoreductase activity, acting on CH-OH group of donors;oxidoreductase activity, acting on the CH-OH group of donors, NAD or NADP as acceptor;protein binding;protein dimerization activity;protein homodimerization activity;transition metal …	cell part;cytoplasmic part;intracellular;intracellular membrane-bounded organelle;intracellular organelle;intracellular part;membrane-bounded organelle;mitochondrion;organelle
27.606	29.5648	NaN	NaN	7	7	7	48.7	48.7	48.7	21.606	0	23.838	962220000	11	0	0.961952	NaN	0	-	-	P00375	P00375	Dihydrofolate reductase	Dhfr	Dhfr	amine biosynthetic process;amine metabolic process;aromatic compound biosynthetic process;biosynthetic process;carboxylic acid biosynthetic process;carboxylic acid metabolic process;cellular amine metabolic process;cellular amino acid biosynthetic process;cellular amino acid metabolic process;cellular aromatic compound metabolic process;cellular biosynthetic process;cellular ketone metabolic proc…	binding;catalytic activity;coenzyme binding;cofactor binding;dihydrofolate reductase activity;dihydrofolic acid binding;drug binding;mRNA binding;NADP binding;nucleic acid binding;nucleotide binding;oxidoreductase activity;oxidoreductase activity, acting on the CH-NH group of donors;oxidoreductase activity, acting on the CH-NH group of donors, NAD or NADP as acceptor;RNA binding	cell part;cytoplasmic part;cytosol;intracellular part
30.9684	30.8549	30.9228	33.0246	6	6	6	19.4	19.4	19.4	25.976	0	115.69	11002000000	56	0.377644	0.784608	-1.06209	-0.9216	-	-	P00405	P00405	Cytochrome c oxidase subunit 2	Mtco2	Mtco2	cellular metabolic process;cellular process;electron transport chain;generation of precursor metabolites and energy;metabolic process;oxidation-reduction process	binding;catalytic activity;cation binding;cation transmembrane transporter activity;copper ion binding;cytochrome-c oxidase activity;heme-copper terminal oxidase activity;hydrogen ion transmembrane transporter activity;inorganic cation transmembrane transporter activity;ion binding;ion transmembrane transporter activity;metal ion binding;monovalent inorganic cation transmembrane transporter activ…	cell part;cytoplasmic part;extracellular membrane-bounded organelle;extracellular organelle;extracellular region part;extracellular vesicular exosome;integral to membrane;intracellular membrane-bounded organelle;intracellular organelle;intracellular organelle part;intracellular part;intrinsic to membrane;macromolecular complex;membrane;membrane part;membrane-bounded organelle;membrane-bounded ves…
32.0457	31.8654	32.2747	31.979	15	15	15	61.9	61.9	61.9	24.57	0	70.694	15582000000	75	0.369819	0.889325	-0.171315	-0.627176	-	-	P00493	P00493	Hypoxanthine-guanine phosphoribosyltransferase	Hprt1	Hprt1	adenine biosynthetic process;adenine metabolic process;adenine salvage;alcohol metabolic process;amine metabolic process;anatomical structure development;anatomical structure morphogenesis;behavior;benzene-containing compound metabolic process;biological regulation;biosynthetic process;catabolic process;catecholamine metabolic process;catechol-containing compound metabolic process;cell activation…	binding;catalytic activity;cation binding;guanine phosphoribosyltransferase activity;hypoxanthine phosphoribosyltransferase activity;identical protein binding;ion binding;magnesium ion binding;metal ion binding;nucleotide binding;protein binding;protein dimerization activity;protein homodimerization activity;transferase activity;transferase activity, transferring glycosyl groups;transferase activ…	cell part;cytoplasm;cytoplasmic part;cytosol;extracellular membrane-bounded organelle;extracellular organelle;extracellular region part;extracellular vesicular exosome;intracellular part;membrane-bounded organelle;membrane-bounded vesicle;organelle;vesicle
35.031	33.4881	34.833	34.471	23	23	23	80.4	80.4	80.4	29.032	0	323.31	88108000000	228	0.174272	0.947353	-0.392473	-0.439786	-	-	P00920	P00920	Carbonic anhydrase 2	Ca2	Ca2	anatomical structure development;anatomical structure morphogenesis;biological regulation;carbon dioxide transport;cation homeostasis;cellular cation homeostasis;cellular chemical homeostasis;cellular homeostasis;cellular ion homeostasis;cellular metabolic process;cellular monovalent inorganic cation homeostasis;cellular process;cellular response to fluid shear stress;cellular response to stimulu…	arylesterase activity;binding;carbonate dehydratase activity;carbon-oxygen lyase activity;carboxylic ester hydrolase activity;catalytic activity;cation binding;hydrolase activity;hydrolase activity, acting on ester bonds;hydro-lyase activity;ion binding;lyase activity;metal ion binding;transition metal ion binding;zinc ion binding	apical part of cell;axon;basolateral plasma membrane;cell part;cell projection;cytoplasm;cytoplasmic part;cytosol;extracellular membrane-bounded organelle;extracellular organelle;extracellular region part;extracellular space;extracellular vesicular exosome;intracellular part;membrane;membrane part;membrane-bounded organelle;membrane-bounded vesicle;microvillus;myelin sheath;neuron projection;orga…
37.6898	36.7481	36.7164	36.405	131	131	119	71.8	71.8	68.5	186.48	0	323.31	456610000000	1001	0.500801	0.690294	0.65826	1.1046	-	-	P01027	P01027	Complement C3;Complement C3 beta chain;C3-beta-c;Complement C3 alpha chain;C3a anaphylatoxin;Acylation stimulating protein;Complement C3b alpha chain;Complement C3c alpha chain fragment 1;Complement C3dg fragment;Complement C3g fragment;Complement C3d fragment;Complement C3f fragment;Complement C3c alpha chain fragment 2	C3	C3	activation of immune response;biological regulation;carboxylic acid metabolic process;cellular ketone metabolic process;cellular lipid metabolic process;cellular metabolic process;cellular process;complement activation;complement activation, alternative pathway;complement activation, classical pathway;defense response;fatty acid metabolic process;humoral immune response;immune effector process;im…	binding;C5a anaphylatoxin chemotactic receptor binding;C5L2 anaphylatoxin chemotactic receptor binding;endopeptidase inhibitor activity;endopeptidase regulator activity;enzyme inhibitor activity;enzyme regulator activity;G-protein-coupled receptor binding;peptidase inhibitor activity;peptidase regulator activity;protein binding;receptor binding	blood microparticle;extracellular membrane-bounded organelle;extracellular organelle;extracellular region part;extracellular space;extracellular vesicular exosome;membrane-bounded organelle;membrane-bounded vesicle;organelle;vesicle
33.4956	33.7711	32.5617	30.9041	61	61	61	41.1	41.1	41.1	192.91	0	323.31	29518000000	225	0.817898	0.692566	1.9004	2.02132	-	-	P01029;CON__P01030;CON__ENSEMBL:ENSBTAP00000007350	P01029	Complement C4-B;Complement C4 beta chain;Complement C4 alpha chain;C4a anaphylatoxin;Complement C4 gamma chain	C4b	C4b	activation of immune response;biological regulation;complement activation;complement activation, classical pathway;defense response;humoral immune response;immune effector process;immune response;immune system process;inflammatory response;innate immune response;macromolecule metabolic process;metabolic process;positive regulation of biological process;positive regulation of immune response;posit…	endopeptidase inhibitor activity;endopeptidase regulator activity;enzyme inhibitor activity;enzyme regulator activity;peptidase inhibitor activity;peptidase regulator activity	extracellular region part;extracellular space
31.7939	31.0014	30.2861	30.0942	4	4	4	21.2	21.2	21.2	12.273	0	60.317	6634400000	26	1.01059	0.80048	1.20746	2.37841	-	-	P01631	P01631	Ig kappa chain V-II region 26-10	-	-	-	antigen binding;binding	-
30.5883	29.6598	28.305	29.124	4	4	4	35.7	35.7	35.7	12.581	0	96.271	2942100000	12	0.822458	0.654525	1.40955	1.96039	-	-	P01635	P01635	Ig kappa chain V-V region K2	-	-	-	antigen binding;binding	-
28.2244	28.8448	28.0668	NaN	4	4	4	31.3	31.3	31.3	12.986	0	20.782	937620000	13	0	0.961521	0.46779	0	-	-	P01638;P01637	P01638	Ig kappa chain V-V region L6	-	-	-	antigen binding;binding	-
30.6356	29.1295	NaN	29.344	3	3	3	28.5	28.5	28.5	14.311	0	99.834	2429000000	14	0	0.961091	0.538527	0	-	-	P01639	P01639	Ig kappa chain V-V region MOPC 41	Gm5571	Gm5571	-	antigen binding;binding	-
29.4733	28.7082	NaN	NaN	2	2	2	23.5	23.5	23.5	12.615	0	70.793	1239300000	5	0	0.960662	NaN	0	-	-	P01642	P01642	Ig kappa chain V-V region L7	Gm10881	Gm10881	-	antigen binding;binding	-
31.3153	30.3277	30.8052	31.8698	6	6	2	54.6	54.6	19.4	11.954	0	224.87	7526300000	31	0.258886	0.890006	-0.516025	-0.624695	-	-	P01645;P01644;P01646;P01643;P04946	P01645;P01644;P01646;P01643	Ig kappa chain V-V region HP 93G7;Ig kappa chain V-V region HP R16.7;Ig kappa chain V-V region HP 123E6;Ig kappa chain V-V region MOPC 173	-	-	-	antigen binding;binding	-
28.6317	30.404	28.1816	28.3393	4	3	0	68.5	58.6	0	12.039	0	83.884	2143800000	18	0.532981	0.666765	1.25738	1.27056	-	-	P01670;P01672;P01659	P01670;P01672	Ig kappa chain V-III region PC 6684;Ig kappa chain V-III region PC 7940	-	-	-	antigen binding;binding	-
29.2544	30.6593	NaN	28.3099	2	2	2	34.2	34.2	34.2	12.222	0	60.934	2665600000	11	0	0.960232	1.64697	0	-	-	P01723;P01727	P01723;P01727	Ig lambda-1 chain V region;Ig lambda-1 chain V region S43	-	-	-	antigen binding;binding	cell part;membrane;plasma membrane
29.9983	29.9882	NaN	30.1095	4	4	4	32.7	32.7	32.7	12.732	0	57.903	2685900000	10	0	0.959803	-0.116217	0	-	-	P01800;P01799;P01797;P01796;P01802;P01801;P01798;P01804;P01803	P01800;P01799;P01797;P01796;P01802;P01801;P01798;P01804;P01803	Ig heavy chain V-III region T957;Ig heavy chain V-III region ABE-47N;Ig heavy chain V-III region U61;Ig heavy chain V-III region A4;Ig heavy chain V-III region W3082;Ig heavy chain V-III region J606;Ig heavy chain V-III region E109;Ig heavy chain V-III region HPC76;Ig heavy chain V region AMPC1	-	-	-	antigen binding;binding	-
29.1162	28.6406	NaN	NaN	2	2	2	17.4	17.4	17.4	12.447	0	5.1423	961280000	7	0	0.959375	NaN	0	-	-	P01820;P01821;P01819	P01820;P01821;P01819	Ig heavy chain V region PJ14;Ig heavy chain V region MC101;Ig heavy chain V region MOPC 141	-	-	-	antigen binding;binding	-
32.8718	33.4654	33.2098	32.3564	7	7	7	31.5	31.5	31.5	18.08	0	81.906	27665000000	41	0.27119	0.887818	0.385475	0.621986	-	-	P01831	P01831	Thy-1 membrane glycoprotein	Thy1	Thy1	activation of immune response;anatomical structure development;anatomical structure formation involved in morphogenesis;angiogenesis;antigen receptor-mediated signaling pathway;biological adhesion;biological regulation;cell adhesion;cell development;cell junction assembly;cell junction organization;cell surface receptor linked signaling pathway;cell-cell adhesion;cell-substrate junction assembly;…	binding;enzyme activator activity;enzyme regulator activity;GPI anchor binding;GTPase activator activity;GTPase regulator activity;integrin binding;lipid binding;nucleoside-triphosphatase regulator activity;phosphatidylinositol binding;phospholipid binding;protein binding;protein complex binding;receptor binding	adherens junction;anchored to external side of plasma membrane;anchored to membrane;anchored to plasma membrane;anchoring junction;apical plasma membrane;cell junction;cell part;cell projection;cell projection part;cell-substrate adherens junction;cell-substrate junction;cytoplasmic part;cytosol;dendrite;endoplasmic reticulum;external side of plasma membrane;extracellular membrane-bounded organel…
34.9551	34.5482	33.3315	34.223	16	16	16	100	100	100	11.934	0	323.31	69523000000	133	0.732687	0.675304	0.974379	1.65156	-	-	P01837;CON__Q05B55	P01837	Ig kappa chain C region	-	-	-	antigen binding;binding	cell part;membrane;plasma membrane
29.8362	27.7636	NaN	NaN	3	3	2	51.9	51.9	34.6	11.254	0	92.068	1017100000	9	0	0.958947	NaN	0	-	-	P01844	P01844	Ig lambda-2 chain C region	Iglc2	Iglc2	-	antigen binding;binding	cell part;membrane;plasma membrane
34.6654	36.1413	33.313	33.7244	16	16	13	41.8	41.8	33.6	36.389	0	299.51	114180000000	139	0.876016	0.738907	1.88468	2.17606	-	-	P01863;P01865;P84751	P01863;P01865	Ig gamma-2A chain C region, A allele;Ig gamma-2A chain C region, membrane-bound form	Ighg;Igh-1a	Ighg	-	antigen binding;binding	cell part;extracellular region;integral to membrane;intrinsic to membrane;membrane;membrane part;plasma membrane
32.148	NaN	30.3254	32.5271	11	8	8	28.4	20.3	20.3	36.595	0	150.07	9814700000	39	0	0.958519	0.721793	0	-	-	P01864	P01864	Ig gamma-2A chain C region secreted form	-	-	-	antigen binding;binding	extracellular region
33.0728	31.8539	31.9295	32.2031	12	12	12	19.8	19.8	19.8	44.259	0	120.74	19331000000	81	0.229129	0.917744	0.397039	0.547942	-	-	P01867	P01867	Ig gamma-2B chain C region	Igh-3	Igh-3	-	antigen binding;binding	cell part;extracellular region;integral to membrane;intrinsic to membrane;membrane;membrane part;plasma membrane
32.9782	33.8361	31.0882	31.9581	10	10	10	36.4	36.4	36.4	35.704	0	225.24	31339000000	97	1.04094	0.853247	1.88406	2.65034	-	-	P01868;P01869	P01868;P01869	Ig gamma-1 chain C region secreted form;Ig gamma-1 chain C region, membrane-bound form	Ighg1	Ighg1	-	antigen binding;binding	cell part;extracellular region;integral to membrane;intrinsic to membrane;membrane;membrane part;plasma membrane
32.0811	31.5692	31.5514	33.4332	20	20	20	44.1	44.1	44.1	49.971	0	323.31	16484000000	85	0.24835	0.887598	-0.66715	-0.620569	-	-	P01872	P01872	Ig mu chain C region	Ighm	Ighm	activation of immune response;activation of MAPK activity;adaptive immune response;adaptive immune response based on somatic recombination of immune receptors built from immunoglobulin superfamily domains;antigen processing and presentation;antigen receptor-mediated signaling pathway;B cell mediated immunity;B cell receptor signaling pathway;biological regulation;cell surface receptor linked sign…	antigen binding;binding;molecular transducer activity;receptor activity;signal transducer activity;signaling receptor activity;transmembrane signaling receptor activity	B cell receptor complex;cell part;cytoplasmic part;external side of plasma membrane;extracellular region part;extracellular space;immunoglobulin complex;immunoglobulin complex, circulating;integral to membrane;intracellular part;intrinsic to membrane;macromolecular complex;membrane;membrane part;perinuclear region of cytoplasm;plasma membrane;plasma membrane part;protein complex;receptor complex
30.9559	30.7141	29.0745	NaN	6	6	6	29.4	29.4	29.4	36.875	0	102.84	3927800000	19	0	0.958092	1.76048	0	-	-	P01878	P01878	Ig alpha chain C region	-	-	-	antigen binding;binding	-
31.8881	31.8408	31.892	31.7595	6	6	6	55.5	55.5	55.5	13.779	0	7.8062	10880000000	30	0.195728	0.98142	0.0387192	0.227329	-	-	P01887	P01887	Beta-2-microglobulin	B2m	B2m	anatomical structure homeostasis;antigen processing and presentation;antigen processing and presentation of exogenous antigen;antigen processing and presentation of exogenous peptide antigen;antigen processing and presentation of exogenous peptide antigen via MHC class Ib;antigen processing and presentation of exogenous protein antigen via MHC class Ib, TAP-dependent;antigen processing and presen…	binding;identical protein binding;protein binding	adherens junction;anchoring junction;cell junction;cell part;cell-substrate adherens junction;cell-substrate junction;cytoplasm;cytoplasmic part;cytoplasmic vesicle membrane;cytoplasmic vesicle part;endocytic vesicle membrane;external side of plasma membrane;extracellular membrane-bounded organelle;extracellular organelle;extracellular region part;extracellular space;extracellular vesicular exoso…
30.3131	29.1557	29.5466	29.5744	10	10	7	38.2	38.2	31.1	37.251	0	38.604	3111600000	23	0.10116	0.973627	0.173902	0.256165	-	-	P01898	P01898	H-2 class I histocompatibility antigen, Q10 alpha chain	H2-Q10	H2-Q10	antigen processing and presentation;antigen processing and presentation of peptide antigen;antigen processing and presentation of peptide antigen via MHC class I;biological regulation;immune response;immune system process;positive regulation of adaptive immune response;positive regulation of adaptive immune response based on somatic recombination of immune receptors built from immunoglobulin supe…	antigen binding;beta-2-microglobulin binding;binding;peptide antigen binding;peptide binding;protein binding;protein complex binding;receptor binding;T cell receptor binding;TAP binding	cell part;cell surface;cytoplasmic part;cytoplasmic vesicle membrane;cytoplasmic vesicle part;endocytic vesicle membrane;endoplasmic reticulum;endoplasmic reticulum exit site;endoplasmic reticulum part;extracellular membrane-bounded organelle;extracellular organelle;extracellular region part;extracellular vesicular exosome;Golgi apparatus;Golgi apparatus part;Golgi cisterna;Golgi medial cisterna;…
29.3179	28.9211	28.7672	29.0979	8	6	2	29.6	22.9	6.9	40.836	0	17.863	1723800000	18	0.264154	0.929957	0.186996	0.521916	-	-	P01899;P14430;P14428;P14429;P01900;P03991;P14431	P01899	H-2 class I histocompatibility antigen, D-B alpha chain	H2-D1	H2-D1	anatomical structure development;antigen processing and presentation;antigen processing and presentation of endogenous antigen;antigen processing and presentation of endogenous peptide antigen;antigen processing and presentation of endogenous peptide antigen via MHC class I;antigen processing and presentation of endogenous peptide antigen via MHC class I via ER pathway;antigen processing and pres…	antigen binding;beta-2-microglobulin binding;binding;peptide antigen binding;peptide binding;protein binding;protein complex binding;receptor binding;T cell receptor binding;TAP binding	cell part;cell surface;cytoplasmic part;cytoplasmic vesicle membrane;cytoplasmic vesicle part;endocytic vesicle membrane;endoplasmic reticulum;endoplasmic reticulum exit site;endoplasmic reticulum part;external side of plasma membrane;extracellular membrane-bounded organelle;extracellular organelle;extracellular region part;extracellular vesicular exosome;Golgi apparatus;Golgi apparatus part;Golg…
27.4285	27.9786	NaN	NaN	3	1	1	10.3	4.1	4.1	41.301	0.0011585	1.9527	430090000	4	0	0.957665	NaN	0	-	-	P01901;P01902	P01901	H-2 class I histocompatibility antigen, K-B alpha chain	H2-K1	H2-K1	anatomical structure development;antigen processing and presentation;antigen processing and presentation of endogenous antigen;antigen processing and presentation of endogenous peptide antigen;antigen processing and presentation of endogenous peptide antigen via MHC class I;antigen processing and presentation of endogenous peptide antigen via MHC class I via ER pathway;antigen processing and pres…	antigen binding;beta-2-microglobulin binding;binding;peptide antigen binding;peptide binding;protein binding;protein complex binding;receptor binding;T cell receptor binding;TAP binding	cell part;cell surface;cytoplasmic part;cytoplasmic vesicle membrane;cytoplasmic vesicle part;endocytic vesicle membrane;endoplasmic reticulum;endoplasmic reticulum exit site;endoplasmic reticulum part;external side of plasma membrane;extracellular membrane-bounded organelle;extracellular organelle;extracellular region part;extracellular vesicular exosome;Golgi apparatus;Golgi apparatus part;Golg…
39.5309	38.3563	38.6533	39.5265	21	21	19	100	100	93.7	15.085	0	323.31	2407900000000	1348	0.0655095	0.981658	-0.146355	-0.175941	-	-	P01942;P06467	P01942	Hemoglobin subunit alpha	Hba	Hba	biological regulation;cell maturation;cellular developmental process;cellular process;developmental maturation;developmental process;erythrocyte maturation;negative regulation of biological process;negative regulation of biosynthetic process;negative regulation of cellular biosynthetic process;negative regulation of cellular macromolecule biosynthetic process;negative regulation of cellular metab…	binding;cation binding;heme binding;ion binding;iron ion binding;metal ion binding;oxygen binding;oxygen transporter activity;substrate-specific transporter activity;tetrapyrrole binding;transition metal ion binding;transporter activity	cell part;cytoplasmic part;cytosolic part;extracellular membrane-bounded organelle;extracellular organelle;extracellular region part;extracellular vesicular exosome;hemoglobin complex;intracellular part;macromolecular complex;membrane-bounded organelle;membrane-bounded vesicle;myelin sheath;organelle;protein complex;vesicle
39.1973	36.3225	38.4527	38.9263	29	29	18	100	100	89.8	15.84	0	323.31	1773700000000	1240	0.230102	0.899582	-0.929626	-0.597141	-	-	P02088	P02088	Hemoglobin subunit beta-1	Hbb-b1	Hbb-b1	-	binding;cation binding;heme binding;ion binding;iron ion binding;metal ion binding;oxygen binding;oxygen transporter activity;substrate-specific transporter activity;tetrapyrrole binding;transition metal ion binding;transporter activity	cell part;cytoplasmic part;cytosolic part;hemoglobin complex;intracellular part;macromolecular complex;myelin sheath;protein complex
37.2101	32.5632	37.1594	31.6062	29	18	18	100	89.8	89.8	15.878	0	323.31	309470000000	220	0.0447558	0.985511	0.503792	0.135411	-	-	P02089;P02104	P02089	Hemoglobin subunit beta-2	Hbb-b2	Hbb-b2	anatomical structure development;biological regulation;cell development;cellular developmental process;cellular process;developmental process;erythrocyte development;negative regulation of biological process;negative regulation of biosynthetic process;negative regulation of cellular biosynthetic process;negative regulation of cellular macromolecule biosynthetic process;negative regulation of cell…	binding;cation binding;heme binding;ion binding;iron ion binding;metal ion binding;oxygen binding;oxygen transporter activity;substrate-specific transporter activity;tetrapyrrole binding;transition metal ion binding;transporter activity	blood microparticle;cell part;cytoplasmic part;cytosolic part;extracellular region part;hemoglobin complex;intracellular part;macromolecular complex;protein complex
31.2025	30.8254	31.5788	32.1469	8	8	8	34.6	34.6	34.6	15.328	0	11.275	9869800000	34	0.88455	0.657663	-0.848929	-1.92535	-	-	P84244;P84228;P68433;P02301	P84244;P84228;P68433;P02301	Histone H3.3;Histone H3.2;Histone H3.1;Histone H3.3C	H3f3a;Hist1h3b;Hist1h3a;H3f3c	H3f3a	biological regulation;cellular component assembly;cellular component assembly at cellular level;cellular component organization;cellular component organization at cellular level;cellular component organization or biogenesis;cellular component organization or biogenesis at cellular level;cellular macromolecular complex assembly;cellular macromolecular complex subunit organization;cellular process;…	binding;DNA binding;nucleic acid binding	cell part;chromosomal part;chromosome;extracellular membrane-bounded organelle;extracellular organelle;extracellular region part;extracellular vesicular exosome;intracellular membrane-bounded organelle;intracellular non-membrane-bounded organelle;intracellular organelle;intracellular organelle part;intracellular part;macromolecular complex;membrane;membrane-bounded organelle;membrane-bounded vesi…
32.4774	33.2611	33.505	32.7286	36	36	36	24.3	24.3	24.3	177.3	0	323.31	27845000000	153	0.156447	0.958727	-0.247547	-0.379924	-	-	P02468	P02468	Laminin subunit gamma-1	Lamc1	Lamc1	anatomical structure morphogenesis;biological adhesion;cell adhesion;cell junction assembly;cell junction organization;cell migration;cell morphogenesis;cell morphogenesis involved in differentiation;cell motility;cell projection organization;cell-substrate adhesion;cell-substrate junction assembly;cellular component assembly;cellular component assembly at cellular level;cellular component disass…	binding;extracellular matrix structural constituent;glycolipid binding;glycosphingolipid binding;lipid binding;sphingolipid binding;structural molecule activity	basal lamina;basement membrane;extracellular matrix;extracellular matrix part;extracellular membrane-bounded organelle;extracellular organelle;extracellular region;extracellular region part;extracellular vesicular exosome;laminin complex;laminin-10 complex;macromolecular complex;membrane-bounded organelle;membrane-bounded vesicle;organelle;protein complex;vesicle	+
31.09	31.6166	32.1092	31.8078	30	30	30	19.5	19.5	19.5	197.09	0	220.49	10812000000	102	0.734707	0.66076	-0.605224	-1.50035	-	-	P02469	P02469	Laminin subunit beta-1	Lamb1	Lamb1	anatomical structure morphogenesis;behavior;biological adhesion;biological regulation;cell adhesion;cell migration;cell morphogenesis;cell morphogenesis involved in differentiation;cell motility;cell projection organization;cell-cell adhesion;cell-substrate adhesion;cellular component morphogenesis;cellular component movement;cellular component organization;cellular component organization at cell…	binding;enzyme binding;extracellular matrix structural constituent;glycolipid binding;glycosphingolipid binding;integrin binding;lipid binding;protein binding;protein complex binding;receptor binding;sphingolipid binding;structural molecule activity	basal lamina;basement membrane;cell part;cytoplasmic part;extracellular matrix;extracellular matrix part;extracellular membrane-bounded organelle;extracellular organelle;extracellular region;extracellular region part;extracellular space;extracellular vesicular exosome;intracellular part;laminin complex;laminin-1 complex;laminin-10 complex;laminin-2 complex;laminin-8 complex;macromolecular complex…
29.475	27.7993	NaN	NaN	1	1	1	1.8	1.8	1.8	67.337	0.0067849	1.2272	962310000	6	0	0.957238	NaN	0	-	-	P02772	P02772	Alpha-fetoprotein	Afp	Afp	biological regulation;C21-steroid hormone metabolic process;cellular hormone metabolic process;cellular metabolic process;cellular process;cellular response to stimulus;establishment of localization;hormone metabolic process;lipid metabolic process;metabolic process;multicellular organismal process;multicellular organismal reproductive process;ovulation;ovulation cycle process;ovulation from ovar…	binding;cation binding;ion binding;metal ion binding	cell part;cytoplasm;extracellular region part;extracellular space;intracellular part
34.4362	32.8718	33.8666	33.5129	6	6	6	36.3	36.3	36.3	28.057	0	239.68	49347000000	66	0.0139133	0.997363	-0.0357761	-0.0396647	-	-	P03953	P03953	Complement factor D	Cfd	Cfd	activation of immune response;biological regulation;complement activation;complement activation, alternative pathway;defense response;humoral immune response;immune effector process;immune response;immune system process;innate immune response;macromolecule metabolic process;metabolic process;positive regulation of biological process;positive regulation of immune response;positive regulation of im…	catalytic activity;endopeptidase activity;hydrolase activity;peptidase activity;peptidase activity, acting on L-amino acid peptides;serine hydrolase activity;serine-type endopeptidase activity;serine-type peptidase activity	extracellular membrane-bounded organelle;extracellular organelle;extracellular region part;extracellular space;extracellular vesicular exosome;membrane-bounded organelle;membrane-bounded vesicle;organelle;vesicle
31.5375	31.415	31.3053	32.2887	8	8	8	32.7	32.7	32.7	39.991	0	92.696	10916000000	28	0.233719	0.926034	-0.320721	-0.538585	-	-	P03958	P03958	Adenosine deaminase	Ada	Ada	2'-deoxyribonucleotide metabolic process;adenosine catabolic process;adenosine metabolic process;aging;amine transport;anatomical structure development;B cell activation;B cell activation involved in immune response;B cell differentiation;behavior;biological regulation;biosynthetic process;catabolic process;cell activation;cell activation involved in immune response;cell differentiation;cellular …	adenosine deaminase activity;binding;catalytic activity;cation binding;deaminase activity;hydrolase activity;hydrolase activity, acting on carbon-nitrogen (but not peptide) bonds;hydrolase activity, acting on carbon-nitrogen (but not peptide) bonds, in cyclic amidines;ion binding;metal ion binding;nucleoside binding;purine nucleoside binding;transition metal ion binding;zinc ion binding	cell body;cell junction;cell part;cell projection cytoplasm;cell projection part;cell surface;cytoplasm;cytoplasmic membrane-bounded vesicle lumen;cytoplasmic part;cytoplasmic vesicle part;cytosol;dendrite cytoplasm;external side of plasma membrane;extracellular region part;extracellular space;intracellular membrane-bounded organelle;intracellular organelle;intracellular organelle part;intracellu…
35.3243	34.1738	33.6405	32.8438	17	17	17	53.5	53.5	53.5	43.929	0	323.31	84439000000	164	0.784816	0.651642	1.50688	1.88421	-	-	P03987	P03987	Ig gamma-3 chain C region	-	-	-	antigen binding;binding	cell part;extracellular region;integral to membrane;intrinsic to membrane;membrane;membrane part;plasma membrane
35.6704	35.2101	35.0068	36.1111	24	23	23	93.9	93.9	93.9	14.65	0	323.31	163650000000	307	0.0649626	0.981648	-0.118694	-0.169989	-	-	P04117	P04117	Fatty acid-binding protein, adipocyte	Fabp4	Fabp4	biological regulation;brown fat cell differentiation;cell differentiation;cellular developmental process;cellular process;cellular response to chemical stimulus;cellular response to inorganic substance;cellular response to lithium ion;cellular response to metal ion;cellular response to stimulus;chemical homeostasis;cholesterol homeostasis;cytokine production;developmental process;fat cell differe…	binding;lipid binding;transporter activity	cell part;cytoplasm;extracellular membrane-bounded organelle;extracellular organelle;extracellular region part;extracellular vesicular exosome;intracellular organelle part;intracellular part;membrane-bounded organelle;membrane-bounded vesicle;nuclear part;nucleoplasm;organelle;organelle part;vesicle
33.2832	33.2535	32.4527	32.0325	33	33	33	42.3	42.3	42.3	85.004	0	276.46	24907000000	137	1.40156	1	1.02573	3.30231	+	-	P04186	P04186	Complement factor B;Complement factor B Ba fragment;Complement factor B Bb fragment	Cfb	Cfb	activation of immune response;biological regulation;cell proliferation;complement activation;complement activation, alternative pathway;defense response;humoral immune response;immune effector process;immune response;immune system process;innate immune response;macromolecule metabolic process;metabolic process;positive regulation of biological process;positive regulation of immune response;positi…	catalytic activity;endopeptidase activity;hydrolase activity;peptidase activity;peptidase activity, acting on L-amino acid peptides;serine hydrolase activity;serine-type endopeptidase activity;serine-type peptidase activity	blood microparticle;extracellular membrane-bounded organelle;extracellular organelle;extracellular region part;extracellular space;extracellular vesicular exosome;membrane-bounded organelle;membrane-bounded vesicle;organelle;vesicle
34.5851	34.2788	34.8992	39.2305	34	34	34	99.4	99.4	99.4	17.069	0	323.31	496130000000	500	0.457118	0.673377	-2.63284	-1.15931	-	-	P04247	P04247	Myoglobin	Mb	Mb	anatomical structure development;brown fat cell differentiation;cell differentiation;cellular developmental process;cellular process;developmental process;enucleate erythrocyte differentiation;erythrocyte differentiation;fat cell differentiation;heart development;multicellular organismal process;muscle contraction;muscle system process;myeloid cell differentiation;organ development;response to ch…	binding;cation binding;heme binding;ion binding;iron ion binding;metal ion binding;oxygen binding;oxygen transporter activity;substrate-specific transporter activity;tetrapyrrole binding;transition metal ion binding;transporter activity	extracellular membrane-bounded organelle;extracellular organelle;extracellular region part;extracellular vesicular exosome;membrane-bounded organelle;membrane-bounded vesicle;organelle;vesicle
37.6486	38.0602	38.8948	39.44	26	26	26	41.2	41.2	41.2	27.167	0	323.31	1777800000000	881	1.21105	0.904787	-1.31301	-2.97324	-	-	P04370	P04370	Myelin basic protein	Mbp	Mbp	aging;anatomical structure development;axon ensheathment;biological regulation;cellular component organization;cellular component organization or biogenesis;cellular process;developmental process;ensheathment of neurons;membrane organization;myelination;negative regulation of axonogenesis;negative regulation of biological process;negative regulation of cell development;negative regulation of cell…	binding;enzyme binding;protease binding;protein binding;structural constituent of myelin sheath;structural molecule activity	axon part;cell body;cell part;cell periphery;cell projection;cell projection part;compact myelin;cytoplasm;internode region of axon;intracellular membrane-bounded organelle;intracellular organelle;intracellular part;membrane;membrane-bounded organelle;myelin sheath;neuronal cell body;nucleus;organelle;plasma membrane
32.178	29.7121	31.5586	30.5875	8	8	8	9.5	9.5	9.5	103.13	0	101.49	8929000000	54	0.0306668	0.994103	-0.12806	-0.089861	-	-	P04919	P04919	Band 3 anion transport protein	Slc4a1	Slc4a1	anion transport;bicarbonate transport;biological regulation;cation homeostasis;cellular cation homeostasis;cellular chemical homeostasis;cellular homeostasis;cellular ion homeostasis;cellular monovalent inorganic cation homeostasis;cellular process;chemical homeostasis;chloride transport;establishment of localization;homeostatic process;inorganic anion transport;ion homeostasis;ion transport;mono…	active transmembrane transporter activity;anion transmembrane transporter activity;anion:anion antiporter activity;ankyrin binding;antiporter activity;bicarbonate transmembrane transporter activity;binding;chloride transmembrane transporter activity;cytoskeletal protein binding;identical protein binding;inorganic anion exchanger activity;inorganic anion transmembrane transporter activity;ion tran…	basolateral plasma membrane;blood microparticle;cell cortex part;cell part;contractile fiber part;cortical cytoskeleton;cytoplasmic part;cytoskeleton;extracellular membrane-bounded organelle;extracellular organelle;extracellular region part;extracellular vesicular exosome;integral to membrane;integral to plasma membrane;intracellular non-membrane-bounded organelle;intracellular organelle;intracel…
28.5753	NaN	29.2736	28.4778	4	4	4	16.1	16.1	16.1	27.977	0	23.464	1322600000	12	0	0.956812	-0.30043	0	-	-	P04925	P04925	Major prion protein	Prnp	Prnp	behavior;biological regulation;cation homeostasis;cellular cation homeostasis;cellular chemical homeostasis;cellular component assembly;cellular component organization;cellular component organization or biogenesis;cellular copper ion homeostasis;cellular homeostasis;cellular ion homeostasis;cellular metabolic process;cellular nitrogen compound metabolic process;cellular process;cellular response …	binding;cation binding;copper ion binding;cytoskeletal protein binding;identical protein binding;ion binding;metal ion binding;microtubule binding;protein binding;transition metal ion binding;tubulin binding	anchored to membrane;cell part;cell surface;cytoplasmic part;endoplasmic reticulum;extracellular membrane-bounded organelle;extracellular organelle;extracellular region part;extracellular vesicular exosome;Golgi apparatus;intracellular membrane-bounded organelle;intracellular organelle;intracellular organelle part;intracellular part;intrinsic to membrane;membrane;membrane part;membrane raft;membr…
29.1636	29.1575	27.5034	29.7458	3	3	2	32.7	32.7	32.7	11.391	0	12.732	1769500000	9	0.167614	0.946134	0.535922	0.438844	-	-	P04944;P04941;P04940;P04943	P04944;P04941;P04940	Ig kappa chain V-VI region NQ5-78.2.6;Ig kappa chain V-VI region NQ2-48.2.2;Ig kappa chain V-VI region NQ2-17.4.1	-	-	-	antigen binding;binding	-
33.8434	33.8596	34.5769	34.09	45	30	30	74.9	55.4	55.4	39.394	0	323.31	59725000000	188	0.729409	0.64604	-0.481956	-1.40268	-	-	P05063	P05063	Fructose-bisphosphate aldolase C	Aldoc	Aldoc	aging;alcohol catabolic process;alcohol metabolic process;anatomical structure morphogenesis;apoptosis;carbohydrate catabolic process;carbohydrate metabolic process;catabolic process;cell death;cell differentiation;cellular carbohydrate catabolic process;cellular carbohydrate metabolic process;cellular component assembly;cellular component organization;cellular component organization or biogenesi…	aldehyde-lyase activity;binding;carbon-carbon lyase activity;catalytic activity;cytoskeletal protein binding;fructose-bisphosphate aldolase activity;lyase activity;protein binding	axon;cell part;cell projection;cytoplasmic part;extracellular membrane-bounded organelle;extracellular organelle;extracellular region part;extracellular vesicular exosome;intracellular membrane-bounded organelle;intracellular organelle;intracellular part;membrane-bounded organelle;membrane-bounded vesicle;mitochondrion;neuron projection;organelle;vesicle
39.1431	39.6535	38.8105	41.2188	74	74	59	99.7	99.7	88.2	39.355	0	323.31	4036500000000	2018	0.17639	0.942412	-0.616381	-0.463146	-	-	P05064	P05064	Fructose-bisphosphate aldolase A	Aldoa	Aldoa	alcohol catabolic process;alcohol metabolic process;carbohydrate catabolic process;carbohydrate metabolic process;catabolic process;cellular carbohydrate catabolic process;cellular carbohydrate metabolic process;cellular component assembly;cellular component organization;cellular component organization or biogenesis;cellular metabolic process;cellular process;generation of precursor metabolites a…	aldehyde-lyase activity;binding;carbon-carbon lyase activity;catalytic activity;enzyme binding;fructose-bisphosphate aldolase activity;lyase activity;protease binding;protein binding	cell part;contractile fiber part;cytoplasmic part;intracellular part;M band;macromolecular complex;membrane;myelin sheath;organelle part;protein complex;Z disc
32.4987	32.5421	32.3212	33.0312	22	22	12	43	43	27.1	40.57	0	192.52	20573000000	88	0.152368	0.967164	-0.155804	-0.341943	-	-	P05132	P05132	cAMP-dependent protein kinase catalytic subunit alpha	Prkaca	Prkaca	anatomical structure formation involved in morphogenesis;biological regulation;carbohydrate homeostasis;cell maturation;cellular chemical homeostasis;cellular developmental process;cellular glucose homeostasis;cellular homeostasis;cellular macromolecule metabolic process;cellular metabolic process;cellular process;cellular process involved in reproduction;cellular protein metabolic process;cellul…	adenyl nucleotide binding;adenyl ribonucleotide binding;ATP binding;binding;cAMP-dependent protein kinase activity;catalytic activity;cyclic nucleotide-dependent protein kinase activity;enzyme binding;kinase activity;kinase binding;nucleotide binding;phosphotransferase activity, alcohol group as acceptor;protein binding;protein kinase A binding;protein kinase A regulatory subunit binding;protein …	AMP-activated protein kinase complex;cell part;centrosome;cytoplasm;cytoplasmic part;cytoskeletal part;cytosol;extracellular membrane-bounded organelle;extracellular organelle;extracellular region part;extracellular vesicular exosome;intracellular membrane-bounded organelle;intracellular non-membrane-bounded organelle;intracellular organelle;intracellular organelle part;intracellular part;macromo…
36.5139	36.4604	36.9257	38.449	53	53	53	98.5	98.5	98.5	46.247	0	323.31	495720000000	501	0.591803	0.659441	-1.20021	-1.39214	-	-	P05201	P05201	Aspartate aminotransferase, cytoplasmic	Got1	Got1	2-oxoglutarate metabolic process;alcohol biosynthetic process;alcohol metabolic process;alditol biosynthetic process;alditol metabolic process;amine biosynthetic process;amine catabolic process;amine metabolic process;aspartate biosynthetic process;aspartate catabolic process;aspartate family amino acid biosynthetic process;aspartate family amino acid catabolic process;aspartate family amino acid…	binding;carbon-carbon lyase activity;carboxylic acid binding;carboxy-lyase activity;catalytic activity;cofactor binding;L-aspartate:2-oxoglutarate aminotransferase activity;L-cysteine:2-oxoglutarate aminotransferase activity;L-phenylalanine aminotransferase activity;L-phenylalanine:2-oxoglutarate aminotransferase activity;lyase activity;phosphatidylserine decarboxylase activity;pyridoxal phosphat…	axon part;axon terminus;cell part;cell projection part;cytoplasm;cytoplasmic part;cytosol;extracellular membrane-bounded organelle;extracellular organelle;extracellular region part;extracellular vesicular exosome;intracellular membrane-bounded organelle;intracellular organelle;intracellular part;lysosome;lytic vacuole;membrane-bounded organelle;membrane-bounded vesicle;neuron projection terminus;…
35.0766	34.494	35.6385	37.436	39	39	39	73.5	73.5	73.5	47.411	0	323.31	224290000000	307	0.688557	0.671476	-1.75198	-1.67686	-	-	P05202	P05202	Aspartate aminotransferase, mitochondrial	Got2	Got2	2-oxoglutarate metabolic process;amine biosynthetic process;amine catabolic process;amine metabolic process;aspartate biosynthetic process;aspartate catabolic process;aspartate family amino acid biosynthetic process;aspartate family amino acid catabolic process;aspartate family amino acid metabolic process;aspartate metabolic process;biosynthetic process;carboxylic acid biosynthetic process;carbo…	binding;catalytic activity;cofactor binding;kynurenine-oxoglutarate transaminase activity;L-aspartate:2-oxoglutarate aminotransferase activity;L-phenylalanine aminotransferase activity;L-phenylalanine:2-oxoglutarate aminotransferase activity;pyridoxal phosphate binding;transaminase activity;transferase activity;transferase activity, transferring nitrogenous groups;vitamin B6 binding;vitamin bindi…	cell part;cytoplasmic part;extracellular membrane-bounded organelle;extracellular organelle;extracellular region part;extracellular vesicular exosome;intracellular membrane-bounded organelle;intracellular organelle;intracellular organelle lumen;intracellular organelle part;intracellular part;membrane;membrane-bounded organelle;membrane-bounded vesicle;membrane-enclosed lumen;mitochondrial inner m…	+
35.0147	34.2229	34.7197	33.8669	58	6	0	72.3	14.9	0	50.151	0	323.31	83640000000	199	0.199173	0.936642	0.325502	0.47738	-	-	P05213	P05213	Tubulin alpha-1B chain	Tuba1b	Tuba1b	cellular component assembly;cellular component assembly at cellular level;cellular component organization;cellular component organization at cellular level;cellular component organization or biogenesis;cellular component organization or biogenesis at cellular level;cellular macromolecular complex assembly;cellular macromolecular complex subunit organization;cellular macromolecule metabolic proces…	binding;catalytic activity;double-stranded RNA binding;enzyme binding;GTP binding;GTPase activity;guanyl nucleotide binding;guanyl ribonucleotide binding;hydrolase activity;hydrolase activity, acting on acid anhydrides;hydrolase activity, acting on acid anhydrides, in phosphorus-containing anhydrides;nucleic acid binding;nucleoside-triphosphatase activity;nucleotide binding;protein binding;purine…	cell part;cytoplasmic microtubule;cytoplasmic part;cytoskeletal part;cytosol;extracellular membrane-bounded organelle;extracellular organelle;extracellular region part;extracellular vesicular exosome;intracellular organelle part;intracellular part;macromolecular complex;membrane-bounded organelle;membrane-bounded vesicle;microtubule;myelin sheath;organelle;organelle part;protein complex;vesicle
28.6121	28.281	NaN	NaN	5	5	5	7.5	7.5	7.5	127.48	0	83.472	723310000	8	0	0.956386	NaN	0	-	-	P05555	P05555	Integrin alpha-M	Itgam	Itgam	activated T cell proliferation;anatomical structure development;biological adhesion;biological regulation;cell activation;cell adhesion;cell chemotaxis;cell development;cell migration;cell motility;cell proliferation;cell surface receptor linked signaling pathway;cell-cell adhesion;cellular component movement;cellular developmental process;cellular extravasation;cellular process;cellular response…	binding;carbohydrate binding;cation binding;glycoprotein binding;glycosaminoglycan binding;heparan sulfate proteoglycan binding;heparin binding;ion binding;metal ion binding;opsonin binding;pattern binding;polysaccharide binding;protein binding;proteoglycan binding	cell part;cell surface;external side of plasma membrane;extracellular membrane-bounded organelle;extracellular organelle;extracellular region part;extracellular vesicular exosome;integral to membrane;integrin complex;intracellular membrane-bounded organelle;intracellular organelle;intracellular part;intrinsic to membrane;macromolecular complex;membrane part;membrane-bounded organelle;membrane-bou…
29.5693	29.2511	NaN	NaN	7	7	7	9.7	9.7	9.7	122.79	0	10.161	3644800000	9	0	0.955961	NaN	0	-	-	P05622	P05622	Platelet-derived growth factor receptor beta	Pdgfrb	Pdgfrb	actin cytoskeleton organization;actin filament-based process;actomyosin structure organization;adrenal gland development;anatomical structure development;anatomical structure formation involved in morphogenesis;anatomical structure homeostasis;anatomical structure morphogenesis;aorta morphogenesis;artery morphogenesis;biological regulation;blood vessel development;blood vessel morphogenesis;cardi…	adenyl nucleotide binding;adenyl ribonucleotide binding;ATP binding;binding;catalytic activity;enzyme binding;growth factor binding;growth factor receptor binding;kinase activity;kinase binding;molecular transducer activity;nucleotide binding;phosphotransferase activity, alcohol group as acceptor;platelet-derived growth factor beta-receptor activity;platelet-derived growth factor binding;platelet…	adherens junction;anchoring junction;apical plasma membrane;cell junction;cell part;cell surface;cell-substrate adherens junction;cell-substrate junction;cytoplasm;cytoplasmic membrane-bounded vesicle;cytoplasmic part;cytoplasmic vesicle;extracellular membrane-bounded organelle;extracellular organelle;extracellular region part;extracellular vesicular exosome;focal adhesion;integral to membrane;in…
35.3763	34.551	34.3339	38.469	25	25	21	82.4	82.4	82.4	20.594	0	323.31	330260000000	253	0.247456	0.883492	-1.43778	-0.651079	-	-	P05977	P05977	Myosin light chain 1/3, skeletal muscle isoform	Myl1	Myl1	cardiac muscle contraction;multicellular organismal process;muscle contraction;muscle system process;striated muscle contraction;system process	binding;calcium ion binding;cation binding;ion binding;metal ion binding	cell part;contractile fiber;cytoplasmic part;cytoskeletal part;intracellular non-membrane-bounded organelle;intracellular organelle;intracellular organelle part;intracellular part;macromolecular complex;myofibril;myosin complex;non-membrane-bounded organelle;organelle;organelle part;protein complex
36.4722	36.1403	36.5608	38.9376	53	53	50	93.7	93.7	93.7	36.498	0	323.31	587150000000	606	0.453205	0.691394	-1.44297	-1.11004	-	-	P06151;P00342	P06151	L-lactate dehydrogenase A chain	Ldha	Ldha	ATP biosynthetic process;ATP metabolic process;biosynthetic process;carbohydrate metabolic process;carboxylic acid biosynthetic process;carboxylic acid metabolic process;cell communication;cell motility;cellular biosynthetic process;cellular component movement;cellular ketone metabolic process;cellular metabolic process;cellular nitrogen compound biosynthetic process;cellular nitrogen compound me…	catalytic activity;lactate dehydrogenase activity;L-lactate dehydrogenase activity;oxidoreductase activity;oxidoreductase activity, acting on CH-OH group of donors;oxidoreductase activity, acting on the CH-OH group of donors, NAD or NADP as acceptor	cell part;cell projection;cell projection part;cilium;cytoplasm;cytoplasmic part;cytosol;extracellular membrane-bounded organelle;extracellular organelle;extracellular region part;extracellular vesicular exosome;flagellar fibrous sheath;flagellum part;intracellular membrane-bounded organelle;intracellular organelle;intracellular organelle part;intracellular part;membrane;membrane-bounded organell…
32.9501	33.4713	31.7927	30.6013	7	7	7	73.7	73.7	73.7	12.934	0	116.89	21480000000	29	1.04408	0.90507	2.0137	2.68424	-	-	P06330;P01757;P01756	P06330	Ig heavy chain V region AC38 205.12	-	-	-	antigen binding;binding	-
NaN	NaN	26.9114	27.0809	3	3	3	7.7	7.7	7.7	62.002	0	3.6089	181650000	6	0	0.955536	NaN	0	-	-	P06683	P06683	Complement component C9	C9	C9	activation of immune response;biological regulation;cell death;cellular process;complement activation;complement activation, alternative pathway;complement activation, classical pathway;cytolysis;death;defense response;humoral immune response;immune effector process;immune response;immune system process;innate immune response;macromolecule metabolic process;metabolic process;positive regulation o…	-	blood microparticle;cell part;cytoplasm;extracellular membrane-bounded organelle;extracellular organelle;extracellular region part;extracellular vesicular exosome;intracellular part;macromolecular complex;membrane;membrane attack complex;membrane part;membrane-bounded organelle;membrane-bounded vesicle;organelle;plasma membrane;plasma membrane part;pore complex;protein complex;vesicle
28.6453	29.0194	28.5212	NaN	11	11	11	10.4	10.4	10.4	188.88	0	52.48	1154900000	18	0	0.955111	0.311114	0	-	-	P06684	P06684	Complement C5;Complement C5 beta chain;Complement C5 alpha chain;C5a anaphylatoxin;Complement C5 alpha chain	C5	C5	activation of immune response;biological regulation;calcium ion homeostasis;carbohydrate homeostasis;cation homeostasis;cell death;cell migration;cell motility;cellular calcium ion homeostasis;cellular cation homeostasis;cellular chemical homeostasis;cellular component movement;cellular divalent inorganic cation homeostasis;cellular homeostasis;cellular ion homeostasis;cellular metal ion homeosta…	endopeptidase inhibitor activity;endopeptidase regulator activity;enzyme inhibitor activity;enzyme regulator activity;peptidase inhibitor activity;peptidase regulator activity	cell part;extracellular membrane-bounded organelle;extracellular organelle;extracellular region part;extracellular space;extracellular vesicular exosome;macromolecular complex;membrane attack complex;membrane part;membrane-bounded organelle;membrane-bounded vesicle;organelle;plasma membrane part;pore complex;protein complex;vesicle
36.3891	36.6859	35.8652	35.5499	49	49	49	85.8	85.8	85.8	45.029	0	323.31	261050000000	527	1.20901	0.81868	0.829979	2.62239	-	-	P06728	P06728	Apolipoprotein A-IV	Apoa4	Apoa4	alcohol metabolic process;amine metabolic process;anatomical structure morphogenesis;biological adhesion;biological regulation;biosynthetic process;catabolic process;cell adhesion;cell part morphogenesis;cell projection morphogenesis;cell projection organization;cell-cell adhesion;cellular amine metabolic process;cellular biogenic amine metabolic process;cellular catabolic process;cellular compon…	alcohol binding;amine binding;antioxidant activity;binding;cation binding;cholesterol binding;cholesterol transporter activity;copper ion binding;enzyme activator activity;enzyme regulator activity;identical protein binding;ion binding;lipid binding;lipid transporter activity;metal ion binding;phosphatidylcholine binding;phosphatidylcholine-sterol O-acyltransferase activator activity;phospholipid…	blood microparticle;cell part;cell surface;chylomicron;cytoplasmic part;cytosol;extracellular membrane-bounded organelle;extracellular organelle;extracellular region;extracellular region part;extracellular space;extracellular vesicular exosome;high-density lipoprotein particle;intracellular part;macromolecular complex;membrane-bounded organelle;membrane-bounded vesicle;organelle;plasma lipoprotei…
37.5201	37.1772	37.8731	39.1017	82	82	65	86.6	86.6	74	62.766	0	323.31	905360000000	968	0.66531	0.677718	-1.13874	-1.54342	-	-	P06745	P06745	Glucose-6-phosphate isomerase	Gpi	Gpi	alcohol biosynthetic process;alcohol catabolic process;alcohol metabolic process;anatomical structure formation involved in morphogenesis;angiogenesis;biological regulation;biosynthetic process;carbohydrate biosynthetic process;carbohydrate catabolic process;carbohydrate homeostasis;carbohydrate metabolic process;catabolic process;cellular biosynthetic process;cellular carbohydrate biosynthetic p…	catalytic activity;glucose-6-phosphate isomerase activity;intramolecular oxidoreductase activity;intramolecular oxidoreductase activity, interconverting aldoses and ketoses;isomerase activity	cell part;cell projection membrane;cell projection part;cilium membrane;cilium part;cytoplasm;extracellular membrane-bounded organelle;extracellular organelle;extracellular region part;extracellular space;extracellular vesicular exosome;intracellular organelle part;intracellular part;membrane;membrane part;membrane-bounded organelle;membrane-bounded vesicle;myelin sheath;nuclear part;nucleoplasm;…
28.0987	28.7653	NaN	NaN	6	6	6	21.3	21.3	21.3	37.547	0	20.436	827120000	7	0	0.954687	NaN	0	-	-	P06797	P06797	Cathepsin L1;Cathepsin L1 heavy chain;Cathepsin L1 light chain	Ctsl	Ctsl	aging;anatomical structure development;anatomical structure morphogenesis;autophagic cell death;biological regulation;cell communication;cell death;cell differentiation;cellular developmental process;cellular process;cellular process involved in reproduction;cellular response to external stimulus;cellular response to extracellular stimulus;cellular response to nutrient levels;cellular response to…	aminopeptidase activity;binding;carboxypeptidase activity;catalytic activity;cysteine-type carboxypeptidase activity;cysteine-type endopeptidase activity;cysteine-type exopeptidase activity;cysteine-type peptidase activity;endopeptidase activity;exopeptidase activity;histone binding;hydrolase activity;peptidase activity;peptidase activity, acting on L-amino acid peptides;peptide binding;protein b…	apical part of cell;cell part;cell projection;cytoplasm;cytoplasmic membrane-bounded vesicle;cytoplasmic part;cytoplasmic vesicle;external side of plasma membrane;extracellular membrane-bounded organelle;extracellular organelle;extracellular region part;extracellular space;extracellular vesicular exosome;intracellular membrane-bounded organelle;intracellular non-membrane-bounded organelle;intrace…
35.0805	33.5462	34.1215	35.0617	36	36	36	65.4	65.4	65.4	63.953	0	323.31	81023000000	245	0.10436	0.974179	-0.278223	-0.278292	-	-	P06801	P06801	NADP-dependent malic enzyme	Me1	Me1	carboxylic acid metabolic process;cellular component assembly;cellular component organization;cellular component organization or biogenesis;cellular ketone metabolic process;cellular metabolic process;cellular process;dicarboxylic acid metabolic process;macromolecular complex assembly;macromolecular complex subunit organization;malate metabolic process;metabolic process;organic acid metabolic pro…	binding;carbon-carbon lyase activity;carboxy-lyase activity;catalytic activity;cation binding;coenzyme binding;cofactor binding;ion binding;lyase activity;malate dehydrogenase (decarboxylating) activity;malate dehydrogenase (oxaloacetate-decarboxylating) (NADP+) activity;malate dehydrogenase activity;malic enzyme activity;manganese ion binding;metal ion binding;NAD binding;nucleotide binding;oxal…	cell part;cytoplasmic part;cytosol;intracellular membrane-bounded organelle;intracellular organelle;intracellular part;membrane-bounded organelle;mitochondrion;organelle	+
33.3233	33.6751	32.4228	31.009	31	31	31	30.3	30.3	30.3	139.14	0	271.23	27128000000	107	0.872552	0.728315	1.78333	2.15252	-	-	P06909	P06909	Complement factor H	Cfh	Cfh	activation of immune response;biological regulation;complement activation;complement activation, alternative pathway;defense response;humoral immune response;immune effector process;immune response;immune system process;innate immune response;macromolecule metabolic process;metabolic process;positive regulation of biological process;positive regulation of immune response;positive regulation of im…	binding;carbohydrate binding;complement binding;complement component C3b binding;glycoprotein binding;glycosaminoglycan binding;heparan sulfate proteoglycan binding;heparin binding;opsonin binding;pattern binding;polysaccharide binding;protein binding;proteoglycan binding	blood microparticle;extracellular membrane-bounded organelle;extracellular organelle;extracellular region part;extracellular vesicular exosome;membrane-bounded organelle;membrane-bounded vesicle;organelle;vesicle
34.2866	35.1126	33.858	33.9008	11	11	11	55.4	55.4	55.4	11.721	0	106.96	66944000000	87	0.731039	0.680297	0.820259	1.59728	-	-	P07091	P07091	Protein S100-A4	S100a4	S100a4	biological regulation;positive regulation of biological process;positive regulation of cell communication;positive regulation of cellular process;positive regulation of I-kappaB kinase/NF-kappaB cascade;positive regulation of intracellular protein kinase cascade;positive regulation of response to stimulus;positive regulation of signal transduction;positive regulation of signaling;regulation of bi…	binding;calcium ion binding;cation binding;identical protein binding;ion binding;metal ion binding;protein binding;RAGE receptor binding;receptor binding	cell part;cell projection;cytoplasmic part;extracellular membrane-bounded organelle;extracellular organelle;extracellular region part;extracellular space;extracellular vesicular exosome;intracellular membrane-bounded organelle;intracellular organelle;intracellular part;membrane-bounded organelle;membrane-bounded vesicle;neuron projection;nucleus;organelle;perinuclear region of cytoplasm;vesicle
30.9751	31.7512	31.7874	29.8358	10	10	10	26.8	26.8	26.8	34.45	0	89.64	8518500000	45	0.185832	0.937819	0.551501	0.479505	-	-	P07214	P07214	SPARC	Sparc	Sparc	anatomical structure development;biological regulation;bone development;cellular process;cellular response to chemical stimulus;cellular response to growth factor stimulus;cellular response to organic substance;cellular response to stimulus;developmental process;heart development;inner ear development;lung development;multicellular organismal process;negative regulation of angiogenesis;negative r…	binding;calcium ion binding;cation binding;collagen binding;extracellular matrix binding;ion binding;metal ion binding;protein binding	basement membrane;cell part;cell surface;cytoplasmic membrane-bounded vesicle;cytoplasmic part;cytoplasmic vesicle;cytoplasmic vesicle membrane;cytoplasmic vesicle part;extracellular matrix;extracellular matrix part;extracellular region part;extracellular space;intracellular membrane-bounded organelle;intracellular organelle;intracellular organelle part;intracellular part;membrane;membrane-bounde…
35.8759	34.9095	35.4651	35.8083	16	16	16	76.2	76.2	76.2	15.776	0	323.31	174410000000	242	0.166812	0.958416	-0.244036	-0.398236	-	-	P07309	P07309	Transthyretin	Ttr	Ttr	amine transport;amino acid transport;biological regulation;carboxylic acid transport;cellular hormone metabolic process;cellular lipid metabolic process;cellular metabolic process;cellular process;diterpenoid metabolic process;establishment of localization;fat-soluble vitamin metabolic process;hormone metabolic process;hormone transport;isoprenoid metabolic process;lipid metabolic process;metabol…	binding;hormone binding;identical protein binding;protein binding;thyroid hormone binding	extracellular membrane-bounded organelle;extracellular organelle;extracellular region part;extracellular space;extracellular vesicular exosome;macromolecular complex;membrane-bounded organelle;membrane-bounded vesicle;organelle;protein complex;vesicle
38.8241	39.1705	38.5144	41.5397	80	80	76	89	89	89	43.044	0	323.31	4339400000000	3694	0.245227	0.890048	-1.02977	-0.634658	-	-	P07310	P07310	Creatine kinase M-type	Ckm	Ckm	amine biosynthetic process;amine metabolic process;biosynthetic process;carboxylic acid biosynthetic process;carboxylic acid metabolic process;cellular amine metabolic process;cellular amino acid biosynthetic process;cellular amino acid metabolic process;cellular biosynthetic process;cellular ketone metabolic process;cellular metabolic process;cellular modified amino acid biosynthetic process;cel…	adenyl nucleotide binding;adenyl ribonucleotide binding;ATP binding;binding;catalytic activity;creatine kinase activity;kinase activity;nucleotide binding;phosphotransferase activity, nitrogenous group as acceptor;purine nucleotide binding;purine ribonucleoside triphosphate binding;purine ribonucleotide binding;ribonucleotide binding;transferase activity;transferase activity, transferring phospho…	cell part;cytoplasm;intracellular part
38.4348	38.7779	38.6429	37.6553	69	69	69	98.2	98.2	98.2	38.676	0	323.31	1356300000000	1108	0.324237	0.862277	0.45723	0.734229	-	-	P07356;REV__Q8BND4	P07356	Annexin A2	Anxa2	Anxa2	anatomical structure formation involved in morphogenesis;angiogenesis;biological regulation;body fluid secretion;cellular component assembly;cellular component assembly at cellular level;cellular component organization;cellular component organization at cellular level;cellular component organization or biogenesis;cellular component organization or biogenesis at cellular level;cellular membrane or…	binding;calcium ion binding;calcium-dependent phospholipid binding;calcium-dependent protein binding;cation binding;enzyme inhibitor activity;enzyme regulator activity;ion binding;lipase inhibitor activity;lipid binding;metal ion binding;phosphatidylinositol binding;phosphatidylinositol-4,5-bisphosphate binding;phospholipase A2 inhibitor activity;phospholipase inhibitor activity;phospholipid bind…	basement membrane;basolateral plasma membrane;cell cortex;cell part;cell projection;cell surface;cytoplasm;cytoplasmic membrane-bounded vesicle;cytoplasmic part;cytoplasmic vesicle;cytosol;early endosome;endosomal part;endosome;endosome membrane;extracellular matrix part;extracellular membrane-bounded organelle;extracellular organelle;extracellular region part;extracellular space;extracellular ve…
41.5381	41.6861	41.2017	40.9586	121	121	115	95.1	95.1	94.2	68.692	0	323.31	12991000000000	4872	1.18909	0.738833	0.531935	2.19531	-	-	P07724	P07724	Serum albumin	Alb	Alb	anatomical structure homeostasis;behavior;biological regulation;cell communication;cell killing;cellular process;cellular response to external stimulus;cellular response to extracellular stimulus;cellular response to nutrient levels;cellular response to starvation;cellular response to stimulus;cellular response to stress;circadian behavior;circadian rhythm;circadian sleep/wake cycle process;cytol…	binding;carboxylic acid binding;cation binding;chaperone binding;cofactor binding;DNA binding;drug binding;fatty acid binding;ion binding;lipid binding;metal ion binding;monocarboxylic acid binding;nucleic acid binding;oxygen binding;protein binding;pyridoxal phosphate binding;toxin binding;transition metal ion binding;vitamin B6 binding;vitamin binding;zinc ion binding	basement membrane;blood microparticle;cell part;cytoplasm;extracellular matrix part;extracellular membrane-bounded organelle;extracellular organelle;extracellular region;extracellular region part;extracellular space;extracellular vesicular exosome;intracellular membrane-bounded organelle;intracellular organelle;intracellular part;macromolecular complex;membrane-bounded organelle;membrane-bounded …
36.7482	36.1094	36.5014	36.3078	37	17	6	67.6	45.3	21.3	46.002	0	323.31	367520000000	274	0.0228722	0.992553	0.0242462	0.0558993	-	-	P07758	P07758	Alpha-1-antitrypsin 1-1	Serpina1a	Serpina1a	acute inflammatory response;acute-phase response;biological regulation;carbohydrate metabolic process;cellular carbohydrate metabolic process;cellular macromolecule metabolic process;cellular metabolic process;cellular process;cellular protein metabolic process;defense response;glycosylation;inflammatory response;macromolecule glycosylation;macromolecule metabolic process;macromolecule modificati…	binding;endopeptidase inhibitor activity;endopeptidase regulator activity;enzyme binding;enzyme inhibitor activity;enzyme regulator activity;glycoprotein binding;identical protein binding;peptidase inhibitor activity;peptidase regulator activity;protease binding;protein binding;serine-type endopeptidase inhibitor activity	cell part;cytoplasmic part;endoplasmic reticulum;extracellular membrane-bounded organelle;extracellular organelle;extracellular region;extracellular region part;extracellular space;extracellular vesicular exosome;Golgi apparatus;intracellular membrane-bounded organelle;intracellular organelle;intracellular part;membrane-bounded organelle;membrane-bounded vesicle;organelle;vesicle
37.1277	36.8614	36.975	36.1638	22	22	12	43.8	43.8	30.1	46.879	0	323.31	482270000000	643	0.372388	0.835187	0.425163	0.806879	-	-	P07759;P29621;Q80X76	P07759	Serine protease inhibitor A3K	Serpina3k	Serpina3k	biological regulation;negative regulation of catalytic activity;negative regulation of endopeptidase activity;negative regulation of hydrolase activity;negative regulation of molecular function;negative regulation of peptidase activity;regulation of biological process;regulation of catalytic activity;regulation of endopeptidase activity;regulation of hydrolase activity;regulation of metabolic pro…	endopeptidase inhibitor activity;endopeptidase regulator activity;enzyme inhibitor activity;enzyme regulator activity;peptidase inhibitor activity;peptidase regulator activity;serine-type endopeptidase inhibitor activity	blood microparticle;extracellular membrane-bounded organelle;extracellular organelle;extracellular region part;extracellular space;extracellular vesicular exosome;membrane-bounded organelle;membrane-bounded vesicle;organelle;vesicle
36.5367	36.2317	36.596	35.7868	77	54	54	67	54.3	54.3	84.787	0	323.31	285070000000	504	0.155361	0.960534	0.192814	0.362187	-	-	P07901	P07901	Heat shock protein HSP 90-alpha	Hsp90aa1	Hsp90aa1	apoptosis;biological regulation;biosynthetic process;cardiac muscle cell apoptosis;cell death;cell migration;cell motility;cellular biosynthetic process;cellular component assembly;cellular component assembly at cellular level;cellular component movement;cellular component organization;cellular component organization at cellular level;cellular component organization or biogenesis;cellular compone…	adenyl deoxyribonucleotide binding;adenyl nucleotide binding;adenyl ribonucleotide binding;antigen binding;ATP binding;ATPase activity;binding;catalytic activity;CTP binding;dATP binding;deoxyribonucleotide binding;enzyme regulator activity;GTP binding;guanyl nucleotide binding;guanyl ribonucleotide binding;hydrolase activity;hydrolase activity, acting on acid anhydrides;hydrolase activity, actin…	apical plasma membrane;basolateral plasma membrane;brush border membrane;cell body;cell part;cell projection;cell projection membrane;cell projection part;cell surface;cytoplasm;cytoplasmic membrane-bounded vesicle;cytoplasmic part;cytoplasmic vesicle;cytosol;extracellular matrix;extracellular membrane-bounded organelle;extracellular organelle;extracellular region part;extracellular vesicular exo…
33.6904	34.0658	33.5362	32.9448	42	42	42	46.6	46.6	46.6	71.982	0	323.31	44061000000	236	0.677145	0.650503	0.637613	1.41607	-	-	P08003	P08003	Protein disulfide-isomerase A4	Pdia4	Pdia4	biological regulation;cell redox homeostasis;cellular homeostasis;cellular macromolecule metabolic process;cellular metabolic process;cellular process;cellular protein metabolic process;cellular response to stimulus;cellular response to stress;chaperone-mediated protein folding;homeostatic process;macromolecule metabolic process;metabolic process;primary metabolic process;protein folding;protein …	catalytic activity;intramolecular oxidoreductase activity;intramolecular oxidoreductase activity, interconverting keto- and enol-groups;intramolecular oxidoreductase activity, transposing S-S bonds;isomerase activity;protein disulfide isomerase activity	cell part;cell surface;cytoplasmic membrane-bounded vesicle;cytoplasmic part;cytoplasmic vesicle;endoplasmic reticulum;endoplasmic reticulum chaperone complex;endoplasmic reticulum lumen;endoplasmic reticulum part;intracellular membrane-bounded organelle;intracellular organelle;intracellular organelle lumen;intracellular organelle part;intracellular part;macromolecular complex;melanosome;membrane…
31.3879	31.1806	31.605	32.4097	13	13	13	86.7	86.7	86.7	19.724	0	165.23	10856000000	66	0.649882	0.647223	-0.723132	-1.40272	-	-	P08030	P08030	Adenine phosphoribosyltransferase	Aprt	Aprt	adenine biosynthetic process;adenine metabolic process;adenine salvage;AMP biosynthetic process;AMP metabolic process;AMP salvage;behavior;biological regulation;biosynthetic process;body fluid secretion;cellular aromatic compound metabolic process;cellular biosynthetic process;cellular metabolic compound salvage;cellular metabolic process;cellular nitrogen compound biosynthetic process;cellular n…	adenine binding;adenine phosphoribosyltransferase activity;adenyl nucleotide binding;adenyl ribonucleotide binding;AMP binding;binding;catalytic activity;nucleobase binding;nucleotide binding;purine base binding;purine nucleotide binding;purine ribonucleotide binding;ribonucleotide binding;transferase activity;transferase activity, transferring glycosyl groups;transferase activity, transferring p…	cell part;cytoplasm;extracellular membrane-bounded organelle;extracellular organelle;extracellular region part;extracellular vesicular exosome;intracellular organelle part;intracellular part;membrane-bounded organelle;membrane-bounded vesicle;nuclear part;nucleoplasm;organelle;organelle part;vesicle
33.324	32.832	32.7416	33.0701	19	19	18	73	73	73	25.958	0	271.24	27313000000	107	0.207946	0.945062	0.172131	0.434852	-	-	P08074	P08074	Carbonyl reductase [NADPH] 2	Cbr2	Cbr2	cellular component assembly;cellular component organization;cellular component organization or biogenesis;cellular metabolic process;cellular nitrogen compound metabolic process;cellular process;coenzyme metabolic process;cofactor metabolic process;heterocycle metabolic process;macromolecular complex assembly;macromolecular complex subunit organization;metabolic process;NAD metabolic process;NADH…	binding;carbonyl reductase (NADPH) activity;catalytic activity;oxidoreductase activity;oxidoreductase activity, acting on CH-OH group of donors;oxidoreductase activity, acting on the CH-OH group of donors, NAD or NADP as acceptor;protein binding;protein self-association	cell part;cytoplasmic part;intracellular membrane-bounded organelle;intracellular organelle;intracellular organelle lumen;intracellular organelle part;intracellular part;membrane-bounded organelle;membrane-enclosed lumen;mitochondrial matrix;mitochondrial part;mitochondrion;organelle;organelle lumen;organelle part	+
27.7033	27.401	NaN	NaN	2	2	2	6.9	6.9	6.9	30.036	0.0011701	2.0899	387160000	5	0	0.954263	NaN	0	-	-	P08508;P08101	P08508;P08101	Low affinity immunoglobulin gamma Fc region receptor III;Low affinity immunoglobulin gamma Fc region receptor II	Fcgr3;Fcgr2	Fcgr3	acute inflammatory response;acute inflammatory response to antigenic stimulus;adaptive immune response;adaptive immune response based on somatic recombination of immune receptors built from immunoglobulin superfamily domains;amine transport;antibody-dependent cellular cytotoxicity;antigen processing and presentation;antigen processing and presentation of exogenous antigen;antigen processing and p…	binding;IgG binding;IgG receptor activity;immunoglobulin binding;immunoglobulin receptor activity;molecular transducer activity;protein binding;protein complex binding;receptor activity;receptor signaling protein activity;signal transducer activity;signaling receptor activity;transmembrane signaling receptor activity	cell part;cytoplasm;cytoskeleton;external side of plasma membrane;extracellular membrane-bounded organelle;extracellular organelle;extracellular region;extracellular region part;extracellular vesicular exosome;integral to membrane;integral to plasma membrane;intracellular non-membrane-bounded organelle;intracellular organelle;intracellular part;intrinsic to membrane;intrinsic to plasma membrane;m…
35.7767	36.1564	35.4979	34.9386	64	62	62	60.5	58.7	58.7	92.475	0	323.31	175830000000	456	0.803467	0.688096	0.74832	1.70865	-	-	P08113	P08113	Endoplasmin	Hsp90b1	Hsp90b1	actin cytoskeleton organization;actin filament organization;actin filament-based process;actin rod assembly;biological regulation;catabolic process;cellular catabolic process;cellular component assembly;cellular component assembly at cellular level;cellular component organization;cellular component organization at cellular level;cellular component organization or biogenesis;cellular component org…	adenyl nucleotide binding;adenyl ribonucleotide binding;ATP binding;binding;enzyme binding;lipoprotein particle receptor binding;low-density lipoprotein particle receptor binding;nucleic acid binding;nucleotide binding;phosphatase binding;protein binding;protein phosphatase binding;purine nucleotide binding;purine ribonucleoside triphosphate binding;purine ribonucleotide binding;receptor binding;…	adherens junction;anchoring junction;cell junction;cell part;cell-substrate adherens junction;cell-substrate junction;cytoplasmic membrane-bounded vesicle;cytoplasmic part;cytoplasmic vesicle;cytosol;endoplasmic reticulum;endoplasmic reticulum chaperone complex;endoplasmic reticulum lumen;endoplasmic reticulum membrane;endoplasmic reticulum part;extracellular matrix;extracellular membrane-bounded…
31.0102	31.4566	30.1312	NaN	9	9	6	5.5	5.5	2.9	138.94	0	142.95	5384900000	30	0	0.953839	1.10218	0	-	-	P08121	P08121	Collagen alpha-1(III) chain	Col3a1	Col3a1	aging;anatomical structure development;anatomical structure morphogenesis;aorta smooth muscle tissue morphogenesis;biological adhesion;biological regulation;blood vessel development;cell adhesion;cell surface receptor linked signaling pathway;cell-matrix adhesion;cell-substrate adhesion;cellular component organization;cellular component organization at cellular level;cellular component organizati…	binding;cation binding;extracellular matrix structural constituent;growth factor binding;integrin binding;ion binding;metal ion binding;platelet-derived growth factor binding;protein binding;protein complex binding;receptor binding;SMAD binding;structural molecule activity	collagen;collagen type III;extracellular matrix;extracellular matrix part;extracellular region part;extracellular space;fibrillar collagen;proteinaceous extracellular matrix
26.1168	28.5769	27.363	27.0971	4	4	4	3.7	3.7	3.7	167.32	0	4.3086	637890000	10	0.0299454	0.996121	0.116838	0.0873744	-	-	P08122	P08122	Collagen alpha-2(IV) chain;Canstatin	Col4a2	Col4a2	anatomical structure formation involved in morphogenesis;angiogenesis;biological regulation;biosynthetic process;cell differentiation;cellular biosynthetic process;cellular developmental process;cellular macromolecule biosynthetic process;cellular macromolecule metabolic process;cellular metabolic process;cellular nitrogen compound metabolic process;cellular process;cellular response to chemical …	extracellular matrix structural constituent;structural molecule activity	basement membrane;cell part;collagen;collagen type IV;extracellular matrix;extracellular matrix part;extracellular membrane-bounded organelle;extracellular organelle;extracellular region;extracellular region part;extracellular vesicular exosome;intracellular membrane-bounded organelle;intracellular organelle;intracellular part;membrane-bounded organelle;membrane-bounded vesicle;organelle;sheet-fo…
35.8483	35.3986	36.1853	35.1572	9	9	9	67	67	67	11.186	0	323.31	199740000000	234	0.0269426	0.991386	-0.0478172	-0.0723314	-	-	P08207	P08207	Protein S100-A10	S100a10	S100a10	biological regulation;cellular component assembly;cellular component assembly at cellular level;cellular component organization;cellular component organization at cellular level;cellular component organization or biogenesis;cellular component organization or biogenesis at cellular level;cellular membrane organization;cellular process;establishment of localization;establishment of protein localiza…	binding;calcium ion binding;cation binding;identical protein binding;ion binding;ion channel binding;metal ion binding;protein binding;protein dimerization activity;protein homodimerization activity	cell part;extracellular membrane-bounded organelle;extracellular organelle;extracellular region part;extracellular vesicular exosome;extrinsic to membrane;extrinsic to plasma membrane;membrane part;membrane raft;membrane-bounded organelle;membrane-bounded vesicle;organelle;plasma membrane part;vesicle
37.3558	37.8189	33.1851	34.5653	41	41	41	81	81	81	35.866	0	323.31	389980000000	367	1.43929	1	3.71217	4.48369	+	-	P08226	P08226	Apolipoprotein E	Apoe	Apoe	acylglycerol catabolic process;acylglycerol metabolic process;aging;alcohol metabolic process;alpha-amino-3-hydroxy-5-methyl-4-isoxazole propionate receptor clustering;anatomical structure development;anatomical structure morphogenesis;artery morphogenesis;biological regulation;biosynthetic process;blood vessel morphogenesis;calcium ion homeostasis;carboxylic acid transport;cardiovascular system …	antioxidant activity;beta-amyloid binding;binding;carbohydrate binding;cation binding;cholesterol binding;cholesterol transporter activity;cytoskeletal protein binding;enzyme activator activity;enzyme regulator activity;glycosaminoglycan binding;heparin binding;hydroxyapatite binding;identical protein binding;ion binding;lipid binding;lipid transporter activity;lipoprotein particle binding;lipopr…	blood microparticle;cell body;cell part;cell projection;chylomicron;cytoplasmic part;cytoskeletal part;cytosol;dendrite;discoidal high-density lipoprotein particle;early endosome;endoplasmic reticulum;endosome;envelope;extracellular matrix;extracellular membrane-bounded organelle;extracellular organelle;extracellular region;extracellular region part;extracellular space;extracellular vesicular exo…
37.3413	36.8935	37.2819	36.9261	21	21	21	69.5	69.5	69.5	15.942	0	323.31	488530000000	389	0.0145935	0.999077	0.0133705	0.0346428	-	-	P08228	P08228	Superoxide dismutase [Cu-Zn]	Sod1	Sod1	activation of MAPK activity;aging;amine metabolic process;anatomical structure homeostasis;anterograde axon cargo transport;auditory receptor cell stereocilium organization;axon cargo transport;behavior;biological regulation;biosynthetic process;carboxylic acid metabolic process;cation homeostasis;cell aging;cell projection organization;cellular amine metabolic process;cellular amino acid metabol…	antioxidant activity;binding;catalytic activity;cation binding;chaperone binding;copper ion binding;enzyme binding;GTPase binding;identical protein binding;ion binding;metal ion binding;oxidoreductase activity;oxidoreductase activity, acting on superoxide radicals as acceptor;phosphatase binding;protein binding;protein phosphatase 2B binding;protein phosphatase binding;Rac GTPase binding;Ras GTPa…	cell body;cell part;cell projection cytoplasm;cell projection part;cytoplasm;cytoplasmic membrane-bounded vesicle;cytoplasmic part;cytoplasmic vesicle;cytosol;dendrite cytoplasm;dense core granule;extracellular matrix;extracellular membrane-bounded organelle;extracellular organelle;extracellular region part;extracellular space;extracellular vesicular exosome;intracellular membrane-bounded organel…	+
36.0744	36.0104	36.7323	38.8866	45	45	45	76.9	76.9	76.9	35.611	0	323.31	578480000000	613	0.61486	0.66219	-1.76702	-1.50049	-	-	P08249	P08249	Malate dehydrogenase, mitochondrial	Mdh2	Mdh2	acetyl-CoA catabolic process;acetyl-CoA metabolic process;carbohydrate metabolic process;carboxylic acid metabolic process;catabolic process;cellular catabolic process;cellular ketone metabolic process;cellular macromolecule metabolic process;cellular metabolic process;cellular nitrogen compound metabolic process;cellular process;cellular protein metabolic process;coenzyme catabolic process;coenz…	catalytic activity;L-malate dehydrogenase activity;malate dehydrogenase (NADP+) activity;malate dehydrogenase activity;oxidoreductase activity;oxidoreductase activity, acting on CH-OH group of donors;oxidoreductase activity, acting on the CH-OH group of donors, NAD or NADP as acceptor	cell part;cytoplasmic part;extracellular membrane-bounded organelle;extracellular organelle;extracellular region part;extracellular vesicular exosome;intracellular membrane-bounded organelle;intracellular organelle;intracellular organelle lumen;intracellular organelle part;intracellular part;membrane;membrane-bounded organelle;membrane-bounded vesicle;membrane-enclosed lumen;mitochondrial inner m…	+
36.8847	39.1358	36.0555	34.2323	80	75	75	86.7	84.7	84.7	61.508	0	323.31	702630000000	537	0.729565	0.654915	2.86635	1.85117	-	-	P08551	P08551	Neurofilament light polypeptide	Nefl	Nefl	anatomical structure morphogenesis;anterograde axon cargo transport;axon cargo transport;axon regeneration;axon transport of mitochondrion;axonogenesis;biological regulation;cell part morphogenesis;cell projection morphogenesis;cell projection organization;cellular component assembly;cellular component assembly at cellular level;cellular component morphogenesis;cellular component movement;cellula…	binding;binding, bridging;identical protein binding;protein binding;protein binding, bridging;protein C-terminus binding;structural constituent of cytoskeleton;structural molecule activity	axon;axon part;cell part;cell projection;cell projection part;cytoplasm;cytoplasmic part;cytoskeletal part;cytosolic part;growth cone;intermediate filament;intracellular organelle part;intracellular part;macromolecular complex;myelin sheath;neurofilament;neuron projection;organelle part;protein complex;site of polarized growth;TSC1-TSC2 complex
37.4693	39.0944	37.55	35.5595	106	103	99	76.3	75	72.5	95.915	0	323.31	867540000000	836	0.507158	0.67216	1.72709	1.24715	-	-	P08553;REV__Q8R344	P08553	Neurofilament medium polypeptide	Nefm	Nefm	axon cargo transport;biological regulation;cellular component assembly;cellular component assembly at cellular level;cellular component movement;cellular component organization;cellular component organization at cellular level;cellular component organization or biogenesis;cellular component organization or biogenesis at cellular level;cellular process;cytoskeleton organization;cytoskeleton-depend…	structural molecule activity	axon;axon part;cell part;cell projection;cell projection part;cytoskeletal part;intermediate filament;intracellular organelle part;intracellular part;macromolecular complex;myelin sheath;neurofilament;neuromuscular junction;neuron projection;organelle part;protein complex;synapse
33.7099	33.4499	33.8699	33.1842	21	21	11	54.6	54.6	40	40.489	0	273.78	41210000000	155	0.0464103	0.990003	0.0528259	0.113201	-	-	P08752;P20612;Q3V3I2;P50149	P08752	Guanine nucleotide-binding protein G(i) subunit alpha-2	Gnai2	Gnai2	activation of MAPKK activity;activation of protein kinase activity;adenosine receptor signaling pathway;anatomical structure development;biological regulation;calcium ion homeostasis;cAMP-mediated signaling;cation homeostasis;cell cycle;cell development;cell division;cell proliferation;cell surface receptor linked signaling pathway;cellular calcium ion homeostasis;cellular cation homeostasis;cell…	binding;catalytic activity;cation binding;G-protein beta/gamma-subunit complex binding;G-protein coupled photoreceptor activity;G-protein coupled receptor activity;G-protein-coupled receptor binding;GTP binding;GTPase activity;guanyl nucleotide binding;guanyl ribonucleotide binding;hydrolase activity;hydrolase activity, acting on acid anhydrides;hydrolase activity, acting on acid anhydrides, in p…	acrosomal vesicle;apical plasma membrane;axoneme;cell body;cell part;cell projection;cell projection part;centrosome;cilium;cytoplasm;cytoplasmic membrane-bounded vesicle;cytoplasmic part;cytoplasmic vesicle;cytoskeletal part;cytosol;extracellular membrane-bounded organelle;extracellular organelle;extracellular region part;extracellular vesicular exosome;extrinsic to internal side of plasma membr…
33.6476	32.906	32.3615	32.2327	6	6	3	50	50	32.4	16.689	0	161.35	25706000000	56	0.916151	0.69687	0.979715	2.0567	-	-	P08905	P08905	Lysozyme C-2	Lyz2	Lyz2	cell death;cellular process;cytolysis;death;defense response;defense response to bacterium;defense response to Gram-negative bacterium;defense response to Gram-positive bacterium;multi-organism process;response to bacterium;response to biotic stimulus;response to other organism;response to stimulus;response to stress	binding;catalytic activity;hydrolase activity;hydrolase activity, acting on glycosyl bonds;hydrolase activity, hydrolyzing O-glycosyl compounds;identical protein binding;lysozyme activity;protein binding	extracellular membrane-bounded organelle;extracellular organelle;extracellular region part;extracellular space;extracellular vesicular exosome;membrane-bounded organelle;membrane-bounded vesicle;organelle;vesicle
30.5763	31.256	30.7816	30.6486	13	13	13	20.8	20.8	20.8	88.231	0	182.67	6218600000	56	0.207457	0.945198	0.201056	0.450503	-	-	P09055	P09055	Integrin beta-1	Itgb1	Itgb1	actin cytoskeleton organization;actin filament-based process;actomyosin structure organization;anatomical structure development;anatomical structure homeostasis;anatomical structure morphogenesis;associative learning;axon extension;behavior;biological adhesion;biological regulation;blood vessel endothelial cell migration;calcium ion homeostasis;calcium-independent cell-matrix adhesion;cardiac cel…	actin binding;binding;cation binding;cell adhesion molecule binding;cytoskeletal protein binding;enzyme binding;integrin binding;ion binding;metal ion binding;peptide binding;protease binding;protein binding;protein complex binding;protein dimerization activity;protein heterodimerization activity;receptor activity;receptor binding	acrosomal vesicle;adherens junction;alpha10-beta1 integrin complex;alpha11-beta1 integrin complex;alpha1-beta1 integrin complex;alpha2-beta1 integrin complex;alpha3-beta1 integrin complex;alpha7-beta1 integrin complex;alpha9-beta1 integrin complex;anchoring junction;basement membrane;cell junction;cell part;cell projection;cell projection membrane;cell projection part;cell surface;cell-cell conta…
35.3979	35.8579	35.2404	35.4372	57	57	57	85.7	85.7	85.7	57.058	0	323.31	154260000000	456	0.435071	0.831831	0.289093	0.825628	-	-	P09103	P09103	Protein disulfide-isomerase	P4hb	P4hb	4-hydroxyproline metabolic process;amine metabolic process;biological regulation;carboxylic acid metabolic process;cell redox homeostasis;cellular amine metabolic process;cellular amino acid metabolic process;cellular homeostasis;cellular ketone metabolic process;cellular macromolecule metabolic process;cellular metabolic process;cellular modified amino acid metabolic process;cellular nitrogen co…	catalytic activity;intramolecular oxidoreductase activity;intramolecular oxidoreductase activity, interconverting keto- and enol-groups;intramolecular oxidoreductase activity, transposing S-S bonds;isomerase activity;oxidoreductase activity;oxidoreductase activity, acting on paired donors, with incorporation or reduction of molecular oxygen;oxidoreductase activity, acting on paired donors, with i…	adherens junction;anchoring junction;cell junction;cell part;cell-substrate adherens junction;cell-substrate junction;cytoplasmic membrane-bounded vesicle;cytoplasmic part;cytoplasmic vesicle;endoplasmic reticulum;endoplasmic reticulum chaperone complex;endoplasmic reticulum lumen;endoplasmic reticulum part;endoplasmic reticulum-Golgi intermediate compartment;extracellular membrane-bounded organe…	+
34.0951	34.04	33.3141	32.9911	35	35	35	41.9	41.9	41.9	76.722	0	323.31	43814000000	175	1.51439	1	0.915007	3.46826	+	-	P09405	P09405	Nucleolin	Ncl	Ncl	anatomical structure formation involved in morphogenesis;angiogenesis;biological regulation;developmental process;positive regulation of biological process;positive regulation of biosynthetic process;positive regulation of cellular biosynthetic process;positive regulation of cellular metabolic process;positive regulation of cellular process;positive regulation of gene expression;positive regulati…	binding;DNA binding;identical protein binding;nucleic acid binding;nucleotide binding;protein binding;protein C-terminus binding;RNA binding;sequence-specific DNA binding;telomeric DNA binding	cell cortex;cell part;cytoplasmic part;extracellular membrane-bounded organelle;extracellular organelle;extracellular region part;extracellular vesicular exosome;intracellular membrane-bounded organelle;intracellular non-membrane-bounded organelle;intracellular organelle;intracellular organelle part;intracellular part;macromolecular complex;membrane;membrane-bounded organelle;membrane-bounded ves…
37.6862	38.1781	37.8959	39.5384	73	73	64	99.5	99.5	99.5	44.55	0	323.31	1303600000000	1182	0.340541	0.83492	-0.784952	-0.81998	-	-	P09411	P09411	Phosphoglycerate kinase 1	Pgk1	Pgk1	alcohol catabolic process;alcohol metabolic process;carbohydrate catabolic process;carbohydrate metabolic process;catabolic process;cellular carbohydrate catabolic process;cellular carbohydrate metabolic process;cellular metabolic process;cellular process;generation of precursor metabolites and energy;glucose catabolic process;glucose metabolic process;glycolysis;hexose catabolic process;hexose m…	adenyl nucleotide binding;adenyl ribonucleotide binding;ATP binding;binding;catalytic activity;kinase activity;nucleotide binding;phosphoglycerate kinase activity;phosphotransferase activity, carboxyl group as acceptor;purine nucleotide binding;purine ribonucleoside triphosphate binding;purine ribonucleotide binding;ribonucleotide binding;transferase activity;transferase activity, transferring ph…	cell part;cytoplasm;intracellular part
30.8798	30.0243	30.1688	30.4343	19	19	19	19.7	19.7	19.7	150.92	0	169.24	4779100000	68	0.11419	0.969495	0.150517	0.274736	-	-	P09470	P09470	Angiotensin-converting enzyme;Angiotensin-converting enzyme, soluble form	Ace	Ace	acid secretion;anatomical structure development;arachidonic acid secretion;beta-amyloid metabolic process;biological regulation;carboxylic acid transport;catabolic process;cell proliferation;cell proliferation in bone marrow;cellular catabolic process;cellular macromolecule metabolic process;cellular metabolic process;cellular process;circulatory system process;developmental process;endocrine pro…	actin binding;anion binding;binding;bradykinin receptor binding;carboxypeptidase activity;catalytic activity;cation binding;chloride ion binding;cytoskeletal protein binding;drug binding;endopeptidase activity;enzyme binding;exopeptidase activity;G-protein-coupled receptor binding;hydrolase activity;ion binding;kinase binding;metal ion binding;metallopeptidase activity;mitogen-activated protein k…	cell part;cytoplasm;cytoplasmic part;endosome;external side of plasma membrane;extracellular membrane-bounded organelle;extracellular organelle;extracellular region part;extracellular space;extracellular vesicular exosome;integral to membrane;intracellular membrane-bounded organelle;intracellular organelle;intracellular part;intrinsic to membrane;lysosome;lytic vacuole;membrane;membrane part;memb…
36.7741	37.2411	36.3709	36.7078	22	22	22	78	78	78	21.066	0	323.31	405590000000	414	0.610155	0.671291	0.468271	1.20714	-	-	P09528;Q9D5H4	P09528	Ferritin heavy chain;Ferritin heavy chain, N-terminally processed	Fth1	Fth1	biological regulation;cation homeostasis;cation transport;cellular cation homeostasis;cellular chemical homeostasis;cellular homeostasis;cellular ion homeostasis;cellular iron ion homeostasis;cellular metal ion homeostasis;cellular process;chemical homeostasis;establishment of localization;homeostatic process;immune response;immune system process;intracellular sequestering of iron ion;ion homeost…	binding;catalytic activity;cation binding;ferric iron binding;ferroxidase activity;ion binding;iron ion binding;metal ion binding;oxidoreductase activity;oxidoreductase activity, oxidizing metal ions;oxidoreductase activity, oxidizing metal ions, oxygen as acceptor;transition metal ion binding	cell part;cytoplasmic membrane-bounded vesicle lumen;cytoplasmic part;cytoplasmic vesicle part;endocytic vesicle lumen;extracellular membrane-bounded organelle;extracellular organelle;extracellular region;extracellular region part;extracellular vesicular exosome;intracellular membrane-bounded organelle;intracellular organelle;intracellular organelle part;intracellular part;membrane-bounded organe…	+
28.1615	NaN	29.9902	28.0952	8	5	4	50.5	38.7	33.3	22.421	0	39.664	1232100000	12	0	0.953416	-0.881161	0	-	-	P09542	P09542	Myosin light chain 3	Myl3	Myl3	anatomical structure development;anatomical structure morphogenesis;biological regulation;cardiac muscle contraction;cardiac muscle tissue morphogenesis;developmental process;multicellular organismal process;muscle contraction;muscle system process;muscle tissue development;muscle tissue morphogenesis;regulation of biological process;regulation of biological quality;regulation of heart contractio…	actin binding;actin monomer binding;binding;calcium ion binding;catalytic activity;cation binding;cytoskeletal protein binding;hydrolase activity;hydrolase activity, acting on acid anhydrides;hydrolase activity, acting on acid anhydrides, in phosphorus-containing anhydrides;ion binding;metal ion binding;motor activity;nucleoside-triphosphatase activity;protein binding;pyrophosphatase activity	A band;cell part;contractile fiber part;cytoplasmic part;cytoskeletal part;I band;intracellular organelle part;intracellular part;macromolecular complex;myosin complex;organelle part;protein complex
27.9251	28.3917	NaN	NaN	5	5	5	6.7	6.7	6.7	109.18	0	10.935	593420000	8	0	0.952993	NaN	0	-	-	P09581	P09581	Macrophage colony-stimulating factor 1 receptor	Csf1r	Csf1r	anatomical structure development;biological regulation;cell differentiation;cell junction maintenance;cell junction organization;cell projection organization;cell proliferation;cell surface receptor linked signaling pathway;cell-cell junction maintenance;cell-cell junction organization;cellular component maintenance;cellular component maintenance at cellular level;cellular component organization;…	adenyl nucleotide binding;adenyl ribonucleotide binding;ATP binding;binding;catalytic activity;cytokine binding;enzyme binding;identical protein binding;kinase activity;macrophage colony-stimulating factor receptor activity;molecular transducer activity;nucleotide binding;phosphatase binding;phosphotransferase activity, alcohol group as acceptor;protein binding;protein dimerization activity;prote…	cell part;cell surface;integral to membrane;intrinsic to membrane;membrane;membrane part;plasma membrane
32.7153	32.1185	33.2515	35.2324	15	15	15	59.9	59.9	59.9	24.603	0	323.31	42752000000	122	0.658135	0.689738	-1.82506	-1.60884	-	-	P09671	P09671	Superoxide dismutase [Mn], mitochondrial	Sod2	Sod2	age-dependent response to oxidative stress;age-dependent response to reactive oxygen species;amine metabolic process;anatomical structure development;apoptotic mitochondrial changes;behavior;biological regulation;biosynthetic process;carboxylic acid metabolic process;cation homeostasis;cell development;cell differentiation;cellular amine metabolic process;cellular amino acid metabolic process;cel…	antioxidant activity;binding;catalytic activity;cation binding;DNA binding;identical protein binding;ion binding;manganese ion binding;metal ion binding;nucleic acid binding;oxidoreductase activity;oxidoreductase activity, acting on superoxide radicals as acceptor;oxygen binding;protein binding;superoxide dismutase activity;transition metal ion binding	cell part;cytoplasmic part;extracellular membrane-bounded organelle;extracellular organelle;extracellular region part;extracellular vesicular exosome;intracellular membrane-bounded organelle;intracellular non-membrane-bounded organelle;intracellular organelle;intracellular organelle part;intracellular part;membrane;membrane-bounded organelle;membrane-bounded vesicle;mitochondrial inner membrane;m…	+
29.7907	29.1568	30.8773	30.0254	11	11	11	16.4	16.4	16.4	98.255	0	69.859	3633900000	37	0.684171	0.677022	-0.977582	-1.54942	-	-	P09803	P09803	Cadherin-1;E-Cad/CTF1;E-Cad/CTF2;E-Cad/CTF3	Cdh1	Cdh1	adherens junction organization;anatomical structure development;anatomical structure formation involved in morphogenesis;anatomical structure morphogenesis;biological adhesion;biological regulation;calcium-dependent cell-cell adhesion;cell adhesion;cell development;cell differentiation;cell junction assembly;cell junction organization;cell morphogenesis;cell morphogenesis involved in differentiat…	ankyrin binding;beta-catenin binding;binding;calcium ion binding;cation binding;cell adhesion molecule binding;cytoskeletal protein binding;enzyme binding;gamma-catenin binding;glycoprotein binding;GTPase activating protein binding;ion binding;metal ion binding;phosphatase binding;protein binding;protein domain specific binding;protein phosphatase binding	actin cytoskeleton;adherens junction;aggresome;anchoring junction;apical junction complex;apical part of cell;axon;axon part;axon terminus;basolateral plasma membrane;catenin complex;cell junction;cell part;cell periphery;cell projection;cell projection part;cell surface;cell-cell adherens junction;cell-cell junction;cell-substrate adherens junction;cell-substrate junction;cytoplasm;cytoplasmic p…
34.2988	32.2211	32.9571	34.1855	4	4	4	25.5	25.5	25.5	11.309	0	66.619	42197000000	42	0.0858932	0.975202	-0.311319	-0.238224	-	-	P09813	P09813	Apolipoprotein A-II;Proapolipoprotein A-II	Apoa2	Apoa2	acute inflammatory response;acylglycerol catabolic process;acylglycerol metabolic process;alcohol metabolic process;amine metabolic process;anatomical structure morphogenesis;beta-glucoside transport;biological regulation;biosynthetic process;carbohydrate transport;carboxylic acid metabolic process;catabolic process;cellular amine metabolic process;cellular biogenic amine metabolic process;cellul…	alcohol binding;amine binding;apolipoprotein receptor binding;binding;cation binding;cholesterol binding;cholesterol transporter activity;enzyme activator activity;enzyme inhibitor activity;enzyme regulator activity;high-density lipoprotein particle binding;high-density lipoprotein particle receptor binding;identical protein binding;ion binding;lipase inhibitor activity;lipid binding;lipid transp…	blood microparticle;cell part;chylomicron;cytoplasmic part;cytosol;extracellular membrane-bounded organelle;extracellular organelle;extracellular region;extracellular region part;extracellular space;extracellular vesicular exosome;high-density lipoprotein particle;intracellular part;macromolecular complex;membrane-bounded organelle;membrane-bounded vesicle;organelle;plasma lipoprotein particle;pr…
30.5416	30.38	31.2508	29.8391	14	14	12	21	21	19.7	76.35	0	44.953	5714200000	42	0.0378618	0.990287	-0.0841808	-0.103865	-	-	P0C605	P0C605	cGMP-dependent protein kinase 1	Prkg1	Prkg1	anatomical structure development;biological regulation;cell migration;cell motility;cell projection organization;cellular component movement;cellular component organization;cellular component organization at cellular level;cellular component organization or biogenesis;cellular component organization or biogenesis at cellular level;cellular macromolecule metabolic process;cellular metabolic proces…	adenyl nucleotide binding;adenyl ribonucleotide binding;ATP binding;binding;calcium channel regulator activity;catalytic activity;cGMP binding;cGMP-dependent protein kinase activity;channel regulator activity;cyclic nucleotide binding;cyclic nucleotide-dependent protein kinase activity;GMP binding;guanyl nucleotide binding;guanyl ribonucleotide binding;kinase activity;nucleotide binding;phosphotr…	cell part;cytoplasm;cytoplasmic part;Golgi apparatus;intracellular membrane-bounded organelle;intracellular organelle;intracellular part;membrane;membrane-bounded organelle;organelle;plasma membrane
26.3586	27.3235	NaN	NaN	2	2	2	22	22	22	13.974	0.00048146	2.5666	336060000	5	0	0.952571	NaN	0	-	-	P0C7N9	P0C7N9	Proteasome assembly chaperone 4	Psmg4	Psmg4	-	-	-
29.063	28.0662	NaN	NaN	5	4	3	15.1	12.7	8.7	46.977	0	23.458	686300000	8	0	0.952149	NaN	0	-	-	P0DOV1;Q8CGE8	P0DOV1;Q8CGE8	Interferon-activable protein 205-A	Ifi205a	Ifi205a	biological regulation;cellular process;cellular response to chemical stimulus;cellular response to cytokine stimulus;cellular response to interferon-beta;cellular response to organic substance;cellular response to stimulus;negative regulation of biological process;negative regulation of biosynthetic process;negative regulation of cellular biosynthetic process;negative regulation of cellular macro…	binding;core promoter binding;core promoter proximal region DNA binding;core promoter proximal region sequence-specific DNA binding;DNA binding;double-stranded DNA binding;identical protein binding;nucleic acid binding;nucleic acid binding transcription factor activity;protein binding;regulatory region DNA binding;regulatory region nucleic acid binding;RNA polymerase II core promoter proximal reg…	cell part;cytoplasm;intracellular membrane-bounded organelle;intracellular non-membrane-bounded organelle;intracellular organelle;intracellular organelle part;intracellular part;membrane;membrane-bounded organelle;non-membrane-bounded organelle;nuclear part;nucleolus;nucleus;organelle;organelle part
35.9734	36.9421	36.5241	35.6741	16	16	9	77.2	77.2	69.8	16.837	0	323.31	296320000000	277	0.198068	0.938697	0.358644	0.481821	-	-	P0DP28;P0DP27;P0DP26	P0DP28;P0DP27;P0DP26	-	-	-	-	-	-
36.6462	37.5775	35.8307	35.3749	58	58	58	89.6	89.6	89.6	38.734	0	323.31	338290000000	501	0.997711	0.820752	1.50908	2.44027	-	-	P10107;A2BH40	P10107	Annexin A1	Anxa1	Anxa1	acid secretion;alpha-beta T cell activation;alpha-beta T cell differentiation;anatomical structure development;anatomical structure formation involved in morphogenesis;androgen receptor signaling pathway;arachidonic acid secretion;ATP-dependent chromatin remodeling;biological regulation;biosynthetic process;blood vessel development;carboxylic acid transport;cardiac cell differentiation;cardiac ch…	ATPase activity;ATPase activity, coupled;binding;binding, bridging;calcium ion binding;calcium-dependent phospholipid binding;calcium-dependent protein binding;catalytic activity;cation binding;DNA binding;DNA-dependent ATPase activity;double-stranded DNA-dependent ATPase activity;enzyme inhibitor activity;enzyme regulator activity;helicase activity;hydrolase activity;hydrolase activity, acting o…	adherens junction;anchoring junction;basolateral plasma membrane;cell junction;cell part;cell projection;cell surface;cell-substrate adherens junction;cell-substrate junction;chromatin;chromatin remodeling complex;chromosomal part;cilium;cornified envelope;cytoplasm;cytoplasmic part;cytoskeleton;cytosol;endosome;extracellular membrane-bounded organelle;extracellular organelle;extracellular region…
37.118	37.2276	37.4163	36.9976	45	45	27	60.2	60.2	36.1	50.113	0	323.31	553030000000	692	0.0510164	0.992022	-0.0341301	-0.107868	-	-	P10126	P10126	Elongation factor 1-alpha 1	Eef1a1	Eef1a1	cellular process;cellular response to chemical stimulus;cellular response to endogenous stimulus;cellular response to epidermal growth factor stimulus;cellular response to growth factor stimulus;cellular response to organic substance;cellular response to stimulus;response to chemical stimulus;response to endogenous stimulus;response to epidermal growth factor stimulus;response to growth factor st…	binding;catalytic activity;enzyme binding;GTP binding;GTPase activity;guanyl nucleotide binding;guanyl ribonucleotide binding;hydrolase activity;hydrolase activity, acting on acid anhydrides;hydrolase activity, acting on acid anhydrides, in phosphorus-containing anhydrides;kinase binding;nucleic acid binding;nucleoside-triphosphatase activity;nucleotide binding;protein binding;protein kinase bind…	cell cortex part;cell part;cell projection membrane;cell projection part;cortical actin cytoskeleton;cortical cytoskeleton;cytoplasm;cytoplasmic part;cytoskeletal part;cytoskeleton;cytosol;extracellular membrane-bounded organelle;extracellular organelle;extracellular region part;extracellular space;extracellular vesicular exosome;intracellular membrane-bounded organelle;intracellular non-membrane…
34.2017	34.5093	34.8246	34.7929	42	42	42	37.9	37.9	37.9	136.54	0	323.31	86504000000	333	1.00291	0.680839	-0.453213	-1.78007	-	-	P10493	P10493	Nidogen-1	Nid1	Nid1	biological adhesion;biological regulation;cell adhesion;cell-matrix adhesion;cell-substrate adhesion;cellular component organization;cellular component organization at cellular level;cellular component organization or biogenesis;cellular component organization or biogenesis at cellular level;cellular process;extracellular matrix organization;extracellular structure organization;glomerular basemen…	binding;calcium ion binding;cation binding;collagen binding;extracellular matrix binding;glycoprotein binding;ion binding;laminin binding;laminin-1 binding;metal ion binding;protein binding;proteoglycan binding	basal lamina;basement membrane;cell part;cell periphery;extracellular matrix;extracellular matrix part;extracellular membrane-bounded organelle;extracellular organelle;extracellular region;extracellular region part;extracellular vesicular exosome;membrane-bounded organelle;membrane-bounded vesicle;organelle;proteinaceous extracellular matrix;vesicle
33.1007	33.7396	33.9234	33.1547	20	20	20	70.9	70.9	70.9	36.023	0	323.31	44631000000	165	0.0787934	0.98495	-0.118921	-0.198275	-	-	P10518	P10518	Delta-aminolevulinic acid dehydratase	Alad	Alad	biosynthetic process;cellular aromatic compound metabolic process;cellular biosynthetic process;cellular component assembly;cellular component organization;cellular component organization or biogenesis;cellular metabolic process;cellular nitrogen compound biosynthetic process;cellular nitrogen compound metabolic process;cellular process;cellular response to chemical stimulus;cellular response to …	binding;carbon-oxygen lyase activity;catalytic activity;cation binding;hydro-lyase activity;identical protein binding;ion binding;lead ion binding;lyase activity;metal ion binding;porphobilinogen synthase activity;protein binding;transition metal ion binding;zinc ion binding	cell part;cytoplasmic part;cytosol;extracellular membrane-bounded organelle;extracellular organelle;extracellular region part;extracellular vesicular exosome;intracellular membrane-bounded organelle;intracellular organelle;intracellular part;membrane-bounded organelle;membrane-bounded vesicle;nucleus;organelle;vesicle
34.2002	35.0473	32.7566	33.5405	16	16	16	48.1	48.1	48.1	37.279	0	323.31	69649000000	128	0.90315	0.740211	1.47518	2.17872	-	-	P10605	P10605	Cathepsin B;Cathepsin B light chain;Cathepsin B heavy chain	Ctsb	Ctsb	anatomical structure development;biological regulation;cell differentiation;cellular developmental process;cellular process;cellular response to chemical stimulus;cellular response to endogenous stimulus;cellular response to hormone stimulus;cellular response to organic substance;cellular response to stimulus;cellular response to thyroid hormone stimulus;collagen catabolic process;collagen metabo…	binding;catalytic activity;collagen binding;cysteine-type endopeptidase activity;cysteine-type peptidase activity;endopeptidase activity;glycoprotein binding;hydrolase activity;peptidase activity;peptidase activity, acting on L-amino acid peptides;protein binding;proteoglycan binding	cell part;cytoplasmic membrane-bounded vesicle;cytoplasmic part;cytoplasmic vesicle;extracellular membrane-bounded organelle;extracellular organelle;extracellular region part;extracellular space;extracellular vesicular exosome;intracellular membrane-bounded organelle;intracellular non-membrane-bounded organelle;intracellular organelle;intracellular organelle part;intracellular part;lysosome;lytic…
32.9828	32.5033	33.6975	33.3789	23	9	9	53.8	25.1	25.1	46.402	0	200.24	31503000000	80	0.959095	0.691676	-0.79513	-2.05008	-	-	P10630	P10630	Eukaryotic initiation factor 4A-II;Eukaryotic initiation factor 4A-II, N-terminally processed	Eif4a2	Eif4a2	biological regulation;cellular macromolecule metabolic process;cellular metabolic process;cellular nitrogen compound metabolic process;cellular process;macromolecule metabolic process;metabolic process;nitrogen compound metabolic process;nucleic acid metabolic process;nucleobase-containing compound metabolic process;primary metabolic process;regulation of biological process;regulation of gene exp…	adenyl nucleotide binding;adenyl ribonucleotide binding;ATP binding;ATPase activity;ATPase activity, coupled;ATP-dependent helicase activity;ATP-dependent RNA helicase activity;binding;catalytic activity;helicase activity;hydrolase activity;hydrolase activity, acting on acid anhydrides;hydrolase activity, acting on acid anhydrides, in phosphorus-containing anhydrides;nucleic acid binding;nucleosi…	cell part;cytoplasm;cytoplasmic part;intracellular non-membrane-bounded organelle;intracellular organelle;intracellular organelle part;intracellular part;non-membrane-bounded organelle;nuclear part;nucleolus;organelle;organelle part;perinuclear region of cytoplasm
34.3207	33.9806	35.029	33.4822	48	48	48	68.8	68.8	68.8	76.243	0	323.31	71193000000	318	0.0425581	0.989232	-0.104996	-0.117723	-	-	P10637	P10637	Microtubule-associated protein tau	Mapt	Mapt	adult behavior;adult locomotory behavior;adult walking behavior;anatomical structure morphogenesis;axon cargo transport;axon extension;axonogenesis;behavior;biological regulation;cell growth;cell migration;cell motility;cell part morphogenesis;cell projection morphogenesis;cell projection organization;cellular component morphogenesis;cellular component movement;cellular component organization;cel…	apolipoprotein binding;binding;cytoskeletal protein binding;enzyme binding;kinase binding;lipoprotein particle binding;microtubule binding;protein binding;protein domain specific binding;protein kinase binding;protein-lipid complex binding;SH3 domain binding;tubulin binding	axon;axoneme;cell part;cell projection;cell projection part;cytoplasm;cytoplasmic part;cytoskeletal part;cytoskeleton;cytosol;growth cone;intracellular membrane-bounded organelle;intracellular non-membrane-bounded organelle;intracellular organelle;intracellular organelle part;intracellular part;macromolecular complex;membrane;membrane-bounded organelle;microtubule;microtubule cytoskeleton;neuron …
33.3231	33.7458	34.1602	34.1605	12	12	12	61.9	61.9	61.9	11.675	0	71.947	48600000000	68	1.01058	0.690824	-0.625933	-2.01048	-	-	P10639	P10639	Thioredoxin	Txn	Txn	biological regulation;biosynthetic process;cell redox homeostasis;cellular biosynthetic process;cellular homeostasis;cellular macromolecule biosynthetic process;cellular macromolecule metabolic process;cellular metabolic process;cellular nitrogen compound metabolic process;cellular process;cellular protein metabolic process;cellular response to chemical stimulus;cellular response to oxidative str…	catalytic activity;disulfide oxidoreductase activity;oxidoreductase activity;oxidoreductase activity, acting on a sulfur group of donors;oxidoreductase activity, acting on a sulfur group of donors, disulfide as acceptor;peptide disulfide oxidoreductase activity;protein disulfide oxidoreductase activity	cell part;cytoplasm;cytoplasmic part;cytosol;extracellular membrane-bounded organelle;extracellular organelle;extracellular region part;extracellular vesicular exosome;intracellular membrane-bounded organelle;intracellular organelle;intracellular part;membrane-bounded organelle;membrane-bounded vesicle;mitochondrion;nucleus;organelle;vesicle
36.3606	35.5015	35.5686	36.7083	37	37	26	85.8	85.8	54.1	25.97	0	323.31	233640000000	390	0.0976251	0.973382	-0.207407	-0.25493	-	-	P10649	P10649	Glutathione S-transferase Mu 1	Gstm1	Gstm1	amine metabolic process;carboxylic acid metabolic process;cellular amine metabolic process;cellular amino acid metabolic process;cellular ketone metabolic process;cellular metabolic process;cellular modified amino acid metabolic process;cellular nitrogen compound metabolic process;cellular process;cellular response to chemical stimulus;cellular response to drug;cellular response to stimulus;gluta…	binding;catalytic activity;glutathione transferase activity;identical protein binding;protein binding;protein dimerization activity;protein heterodimerization activity;protein homodimerization activity;transferase activity;transferase activity, transferring alkyl or aryl (other than methyl) groups	cell part;cytoplasm;intracellular part;myelin sheath
31.342	31.7405	31.1661	29.7491	15	15	15	56.1	56.1	56.1	33.88	0	122.31	7819900000	58	0.554685	0.673199	1.08364	1.29618	-	-	P10711;Q9QVN7	P10711	Transcription elongation factor A protein 1	Tcea1	Tcea1	biological regulation;biosynthetic process;cell differentiation;cellular biosynthetic process;cellular developmental process;cellular macromolecule biosynthetic process;cellular macromolecule metabolic process;cellular metabolic process;cellular nitrogen compound metabolic process;cellular process;developmental process;erythrocyte differentiation;macromolecule biosynthetic process;macromolecule m…	binding;cation binding;DNA binding;ion binding;metal ion binding;nucleic acid binding;transition metal ion binding;zinc ion binding	cell part;centrosome;cytoplasmic part;cytoskeletal part;intracellular membrane-bounded organelle;intracellular non-membrane-bounded organelle;intracellular organelle;intracellular organelle part;intracellular part;membrane-bounded organelle;microtubule organizing center;non-membrane-bounded organelle;nuclear part;nucleolus;nucleoplasm;nucleus;organelle;organelle part
30.8898	29.9919	30.8521	29.7788	10	7	7	47.7	38.1	38.1	23.764	0	175.79	5016700000	41	0.0583271	0.985962	0.125354	0.15675	-	-	P10833	P10833	Ras-related protein R-Ras	Rras	Rras	anatomical structure morphogenesis;biological regulation;cell differentiation;cellular developmental process;cellular process;cellular response to stimulus;developmental process;face morphogenesis;intracellular signal transduction;leukocyte differentiation;metabolic process;negative regulation of biological process;negative regulation of cell migration;negative regulation of cell motility;negativ…	binding;catalytic activity;GDP binding;GTP binding;GTPase activity;guanyl nucleotide binding;guanyl ribonucleotide binding;hydrolase activity;hydrolase activity, acting on acid anhydrides;hydrolase activity, acting on acid anhydrides, in phosphorus-containing anhydrides;nucleoside-triphosphatase activity;nucleotide binding;protein binding;protein complex binding;purine nucleotide binding;purine r…	adherens junction;anchoring junction;cell junction;cell part;cell-substrate adherens junction;cell-substrate junction;cytoplasmic part;cytosol;extracellular membrane-bounded organelle;extracellular organelle;extracellular region part;extracellular vesicular exosome;focal adhesion;intracellular part;membrane;membrane-bounded organelle;membrane-bounded vesicle;organelle;plasma membrane;vesicle
30.0482	30.3106	31.2073	30.4604	15	15	15	38.2	38.2	38.2	58.336	0	138.95	4875100000	36	0.619657	0.665638	-0.654482	-1.31992	-	-	P10852	P10852	4F2 cell-surface antigen heavy chain	Slc3a2	Slc3a2	amine transport;amino acid import;amino acid transport;aromatic amino acid transport;branched-chain aliphatic amino acid transport;carbohydrate metabolic process;carboxylic acid transport;establishment of localization;leucine import;leucine transport;metabolic process;neutral amino acid transport;nitrogen compound transport;organic acid transport;organic substance transport;primary metabolic proc…	active transmembrane transporter activity;amine transmembrane transporter activity;amino acid transmembrane transporter activity;binding;carboxylic acid transmembrane transporter activity;catalytic activity;cation binding;double-stranded RNA binding;ion binding;neutral amino acid transmembrane transporter activity;nucleic acid binding;organic acid transmembrane transporter activity;RNA binding;su…	apical plasma membrane;cell part;cell surface;cytoplasm;cytoplasmic membrane-bounded vesicle;cytoplasmic part;cytoplasmic vesicle;extracellular membrane-bounded organelle;extracellular organelle;extracellular region part;extracellular vesicular exosome;integral to membrane;intracellular membrane-bounded organelle;intracellular organelle;intracellular organelle part;intracellular part;intrinsic to…
32.5749	32.8892	33.1832	33.3142	11	11	11	62.7	62.7	62.7	13.992	0	91.344	29144000000	84	1.02876	0.648862	-0.516638	-1.91173	-	-	Q8CGP2;Q6ZWY9;Q64525;Q64478;Q64475;P10854;P10853;Q8CGP1;Q9D2U9;Q8CGP0;P70696;Q64524	Q8CGP2;Q6ZWY9;Q64525;Q64478;Q64475;P10854;P10853;Q8CGP1;Q9D2U9;Q8CGP0;P70696;Q64524	Histone H2B type 1-P;Histone H2B type 1-C/E/G;Histone H2B type 2-B;Histone H2B type 1-H;Histone H2B type 1-B;Histone H2B type 1-M;Histone H2B type 1-F/J/L;Histone H2B type 1-K;Histone H2B type 3-A;Histone H2B type 3-B;Histone H2B type 1-A;Histone H2B type 2-E	Hist1h2bp;Hist1h2bc;Hist2h2bb;Hist1h2bh;Hist1h2bb;Hist1h2bm;Hist1h2bf;Hist1h2bk;Hist3h2ba;Hist3h2bb;Hist1h2ba;Hist2h2be	Hist1h2bp	antibacterial humoral response;antimicrobial humoral response;ATP-dependent chromatin remodeling;biological regulation;cell migration;cell motility;cellular component assembly;cellular component assembly at cellular level;cellular component disassembly;cellular component disassembly at cellular level;cellular component movement;cellular component organization;cellular component organization at ce…	binding;DNA binding;nucleic acid binding	cell part;chromosomal part;extracellular membrane-bounded organelle;extracellular organelle;extracellular region part;extracellular space;extracellular vesicular exosome;extrinsic to membrane;extrinsic to plasma membrane;intracellular membrane-bounded organelle;intracellular organelle;intracellular organelle part;intracellular part;macromolecular complex;membrane part;membrane-bounded organelle;m…
31.0977	30.0484	31.2225	31.0935	11	11	11	42.3	42.3	42.3	20.861	0	39.685	5964300000	33	0.415959	0.778258	-0.584932	-0.930573	-	-	P10922	P10922	Histone H1.0;Histone H1.0, N-terminally processed	H1f0	H1f0	cellular component assembly;cellular component assembly at cellular level;cellular component organization;cellular component organization at cellular level;cellular component organization or biogenesis;cellular component organization or biogenesis at cellular level;cellular macromolecular complex assembly;cellular macromolecular complex subunit organization;cellular process;chromatin organization…	binding;chromatin binding;chromatin DNA binding;DNA binding;nucleic acid binding;structure-specific DNA binding	actin cytoskeleton;cell part;chromatin;chromosomal part;cytoplasmic part;cytoskeleton;euchromatin;Golgi apparatus;intracellular membrane-bounded organelle;intracellular non-membrane-bounded organelle;intracellular organelle;intracellular organelle part;intracellular part;macromolecular complex;membrane-bounded organelle;non-membrane-bounded organelle;nuclear chromatin;nuclear chromosome part;nucl…
29.5312	30.3536	29.6537	NaN	6	6	6	63	63	63	14.427	0	22.708	2308600000	14	0	0.951727	0.288693	0	-	-	P11031	P11031	Activated RNA polymerase II transcriptional coactivator p15	Sub1	Sub1	biological regulation;cellular process;cellular response to stimulus;positive regulation of biological process;positive regulation of biosynthetic process;positive regulation of cellular biosynthetic process;positive regulation of cellular metabolic process;positive regulation of cellular process;positive regulation of gene expression;positive regulation of macromolecule biosynthetic process;posi…	binding;DNA binding;nucleic acid binding;protein binding transcription factor activity;single-stranded DNA binding;structure-specific DNA binding;transcription coactivator activity;transcription cofactor activity;transcription factor binding transcription factor activity	cell part;extracellular membrane-bounded organelle;extracellular organelle;extracellular region part;extracellular vesicular exosome;intracellular membrane-bounded organelle;intracellular non-membrane-bounded organelle;intracellular organelle;intracellular organelle part;intracellular part;macromolecular complex;membrane-bounded organelle;membrane-bounded vesicle;non-membrane-bounded organelle;nu…
32.0534	33.0294	32.6153	32.1897	13	13	13	10.9	10.9	10.9	138.03	0	154.59	20852000000	84	0.0869641	0.98215	0.138927	0.219698	-	-	P11087;CON__Q862S4	P11087	Collagen alpha-1(I) chain	Col1a1	Col1a1	anatomical structure development;anatomical structure formation involved in morphogenesis;anatomical structure morphogenesis;biological regulation;biomineral tissue development;biosynthetic process;blood vessel development;bone trabecula formation;cartilage development;cartilage development involved in endochondral bone morphogenesis;cell communication;cell differentiation;cellular component asse…	binding;cation binding;extracellular matrix structural constituent;growth factor binding;identical protein binding;ion binding;metal ion binding;platelet-derived growth factor binding;protein binding;structural molecule activity	cell part;collagen;collagen type I;cytoplasm;cytoplasmic membrane-bounded vesicle;cytoplasmic part;cytoplasmic vesicle;endoplasmic reticulum;extracellular matrix;extracellular matrix part;extracellular region part;extracellular space;fibrillar collagen;Golgi apparatus;intracellular membrane-bounded organelle;intracellular organelle;intracellular part;membrane-bounded organelle;membrane-bounded ve…
26.4909	27.9222	NaN	NaN	4	4	4	6.4	6.4	6.4	113.1	0	3.3597	309490000	4	0	0.951306	NaN	0	-	-	P11103	P11103	Poly [ADP-ribose] polymerase 1	Parp1	Parp1	adult behavior;anatomical structure homeostasis;base-excision repair;behavior;behavioral response to cocaine;biological regulation;biosynthetic process;cellular biosynthetic process;cellular component organization;cellular component organization at cellular level;cellular component organization or biogenesis;cellular component organization or biogenesis at cellular level;cellular macromolecule bi…	binding;catalytic activity;cation binding;chromatin binding;coenzyme binding;cofactor binding;DNA binding;enzyme binding;identical protein binding;ion binding;kinase binding;metal ion binding;NAD binding;NAD+ ADP-ribosyltransferase activity;nucleic acid binding;nucleotide binding;protein binding;protein kinase binding;protein N-terminus binding;transcription factor binding;transferase activity;tr…	cell part;cytoplasm;cytoplasmic part;envelope;intracellular membrane-bounded organelle;intracellular non-membrane-bounded organelle;intracellular organelle;intracellular organelle part;intracellular part;macromolecular complex;membrane;membrane-bounded organelle;mitochondrion;non-membrane-bounded organelle;nuclear envelope;nuclear part;nucleolus;nucleoplasm;nucleoplasm part;nucleus;organelle;orga…
33.7476	33.5717	32.2433	29.4831	48	48	48	29.2	29.2	29.2	272.53	0	323.31	27869000000	152	0.743468	0.650457	2.7964	1.88578	-	-	P11276	P11276	Fibronectin;Anastellin	Fn1	Fn1	acute inflammatory response;acute-phase response;anatomical structure formation involved in morphogenesis;anatomical structure morphogenesis;angiogenesis;biological adhesion;biological regulation;calcium-independent cell-matrix adhesion;cell adhesion;cell differentiation;cell junction assembly;cell junction organization;cell morphogenesis;cell morphogenesis involved in differentiation;cell-matrix…	binding;carbohydrate binding;enzyme activator activity;enzyme binding;enzyme regulator activity;glycosaminoglycan binding;heparin binding;integrin binding;pattern binding;peptidase activator activity;peptidase regulator activity;polysaccharide binding;protease binding;protein binding;protein complex binding;receptor binding	apical plasma membrane;basal lamina;basement membrane;blood microparticle;cell part;cytoplasmic part;endoplasmic reticulum-Golgi intermediate compartment;extracellular matrix;extracellular matrix part;extracellular membrane-bounded organelle;extracellular organelle;extracellular region part;extracellular space;extracellular vesicular exosome;fibrinogen complex;intracellular membrane-bounded organ…
33.8842	33.8582	33.5513	32.5779	16	16	16	85.6	85.6	85.6	22.329	0	323.31	41357000000	150	0.620818	0.658551	0.80661	1.37439	-	-	P11352	P11352	Glutathione peroxidase 1	Gpx1	Gpx1	acylglycerol metabolic process;aging;amine metabolic process;anatomical structure development;anatomical structure formation involved in morphogenesis;anatomical structure morphogenesis;angiogenesis;angiogenesis involved in wound healing;apoptosis;biological regulation;blood vessel endothelial cell migration;carboxylic acid metabolic process;catabolic process;cell death;cell development;cell diff…	amine binding;amino acid binding;antioxidant activity;binding;carboxylic acid binding;catalytic activity;glutathione binding;glutathione peroxidase activity;modified amino acid binding;oxidoreductase activity;oxidoreductase activity, acting on paired donors, with incorporation or reduction of molecular oxygen;oxidoreductase activity, acting on peroxide as acceptor;peptide binding;peroxidase activ…	cell part;cytoplasm;cytoplasmic part;extracellular membrane-bounded organelle;extracellular organelle;extracellular region part;extracellular vesicular exosome;intracellular membrane-bounded organelle;intracellular organelle;intracellular part;membrane-bounded organelle;membrane-bounded vesicle;mitochondrion;nucleus;organelle;vesicle	+
31.488	31.324	32.4531	37.2882	23	23	23	99.2	99.2	99.2	14.819	0	323.31	112830000000	179	0.539989	0.66206	-3.46467	-1.37546	-	-	P11404	P11404	Fatty acid-binding protein, heart	Fabp3	Fabp3	biological regulation;chemical homeostasis;cholesterol homeostasis;homeostatic process;lipid homeostasis;phospholipid homeostasis;positive regulation of biological process;positive regulation of biosynthetic process;positive regulation of cellular biosynthetic process;positive regulation of cellular metabolic process;positive regulation of cellular process;positive regulation of lipid biosyntheti…	binding;carboxylic acid binding;cytoskeletal protein binding;fatty acid binding;lipid binding;monocarboxylic acid binding;oleic acid binding;protein binding;transporter activity	cell part;cytoplasmic part;cytosol;extracellular membrane-bounded organelle;extracellular organelle;extracellular region part;extracellular space;extracellular vesicular exosome;intracellular part;membrane-bounded organelle;membrane-bounded vesicle;organelle;vesicle
29.9193	31.0835	29.9732	NaN	2	2	2	7.6	7.6	7.6	43.865	0	14.62	3746500000	10	0	0.950885	0.528137	0	-	-	P11438	P11438	Lysosome-associated membrane glycoprotein 1	Lamp1	Lamp1	autophagic cell death;autophagy;biological regulation;catabolic process;cell death;cellular catabolic process;cellular metabolic process;cellular process;death;establishment of localization;establishment of localization in cell;establishment of protein localization;establishment of protein localization to organelle;gamete generation;Golgi to lysosome transport;Golgi vesicle transport;induction of…	binding;enzyme binding;protein binding;protein domain specific binding	cell body;cell part;cell projection;cell surface;clathrin-coated vesicle;coated vesicle;cytolytic granule;cytoplasm;cytoplasmic membrane-bounded vesicle;cytoplasmic part;cytoplasmic vesicle;dendrite;endosomal part;endosome;endosome membrane;external side of plasma membrane;extracellular membrane-bounded organelle;extracellular organelle;extracellular region part;extracellular vesicular exosome;in…
37.5564	37.542	37.5676	37.2883	87	87	62	77.6	77.6	67.4	83.28	0	323.31	655290000000	1002	0.321187	0.927325	0.121237	0.505514	-	-	P11499;REV__Q8BL66	P11499	Heat shock protein HSP 90-beta	Hsp90ab1	Hsp90ab1	anatomical structure development;biological regulation;cellular component organization;cellular component organization or biogenesis;cellular macromolecule metabolic process;cellular metabolic process;cellular process;cellular protein metabolic process;cellular response to chemical stimulus;cellular response to cytokine stimulus;cellular response to interleukin-4;cellular response to organic cycl…	adenyl deoxyribonucleotide binding;adenyl nucleotide binding;adenyl ribonucleotide binding;antigen binding;ATP binding;binding;CTP binding;dATP binding;deoxyribonucleotide binding;double-stranded RNA binding;enzyme binding;enzyme regulator activity;GTP binding;guanyl nucleotide binding;guanyl ribonucleotide binding;kinase binding;MHC class II protein complex binding;MHC protein complex binding;ni…	apical plasma membrane;basolateral plasma membrane;brush border membrane;cell part;cell projection membrane;cell projection part;cell surface;cytoplasm;cytoplasmic membrane-bounded vesicle;cytoplasmic part;cytoplasmic vesicle;cytosol;extracellular membrane-bounded organelle;extracellular organelle;extracellular region part;extracellular vesicular exosome;inclusion body;intracellular;intracellular…
31.1141	31.7775	31.001	31.0358	21	21	20	6.7	6.7	6.7	425.83	0	166.93	8713100000	71	0.485384	0.75377	0.42736	0.988895	-	-	P11531	P11531	Dystrophin	Dmd	Dmd	anatomical structure arrangement;anatomical structure development;anatomical structure homeostasis;biological regulation;biosynthetic process;calcium-mediated signaling;cardiac muscle contraction;cell development;cellular biosynthetic process;cellular chemical homeostasis;cellular component assembly;cellular component assembly at cellular level;cellular component organization;cellular component o…	actin binding;binding;cation binding;cytoskeletal protein binding;dystroglycan binding;enzyme binding;glycoprotein binding;ion binding;metal ion binding;myosin binding;nitric-oxide synthase binding;protein binding;structural constituent of cytoskeleton;structural constituent of muscle;structural molecule activity;transition metal ion binding;vinculin binding;zinc ion binding	cell junction;cell part;cell projection;cell projection membrane;cell projection part;cell surface;cell-substrate junction;contractile fiber part;costamere;cytoplasmic part;cytoskeleton;dystrophin-associated glycoprotein complex;filopodium;filopodium membrane;intracellular membrane-bounded organelle;intracellular non-membrane-bounded organelle;intracellular organelle;intracellular part;macromolec…
28.5927	NaN	28.9841	32.2489	7	7	2	39.4	39.4	11.7	20.663	0	110.32	4029800000	29	0	0.950464	-2.02376	0	-	-	P11589;P11588;P11591	P11589;P11588	Major urinary protein 2;Major urinary protein 1	Mup2;Mup1	Mup2	aerobic respiration;anatomical structure morphogenesis;behavior;biological regulation;carbohydrate homeostasis;cell communication;cell part morphogenesis;cell surface receptor linked signaling pathway;cellular component morphogenesis;cellular component organization;cellular component organization at cellular level;cellular component organization or biogenesis;cellular component organization or bi…	binding;catalytic activity;insulin-activated receptor activity;kinase activity;molecular transducer activity;odorant binding;pheromone binding;phosphotransferase activity, alcohol group as acceptor;protein kinase activity;protein tyrosine kinase activity;receptor activity;signal transducer activity;signaling receptor activity;transferase activity;transferase activity, transferring phosphorus-cont…	cell part;cytoplasmic part;cytosol;extracellular region part;extracellular space;intracellular membrane-bounded organelle;intracellular organelle;intracellular part;membrane-bounded organelle;nucleus;organelle
31.3865	31.073	32.2522	31.4236	20	20	20	18.7	18.7	18.7	140.97	0	112.46	10610000000	73	0.517955	0.689735	-0.608183	-1.12014	-	-	P11627	P11627	Neural cell adhesion molecule L1	L1cam	L1cam	axon guidance;biological adhesion;biological regulation;cell adhesion;cell adhesion mediated by integrin;cell projection organization;cell surface receptor linked signaling pathway;cell-cell adhesion;cell-cell adhesion mediated by integrin;cellular component organization;cellular component organization at cellular level;cellular component organization or biogenesis;cellular component organization…	binding;carbohydrate binding;identical protein binding;integrin binding;monosaccharide binding;protein binding;protein complex binding;protein self-association;receptor binding;sialic acid binding;sugar binding	adherens junction;anchoring junction;axon part;cell junction;cell part;cell projection part;cell surface;cell-substrate adherens junction;cell-substrate junction;external side of plasma membrane;focal adhesion;integral to membrane;intrinsic to membrane;membrane;membrane part;plasma membrane;plasma membrane part;presynaptic membrane;synapse part;synaptic membrane;terminal button
28.1358	28.8576	28.0644	27.6925	8	8	8	10.7	10.7	10.7	115.04	0	14.756	977300000	14	0.573128	0.6687	0.618247	1.22193	-	-	P11688	P11688	Integrin alpha-5;Integrin alpha-5 heavy chain;Integrin alpha-5 light chain	Itga5	Itga5	behavior;biological adhesion;biological regulation;cell adhesion;cell adhesion mediated by integrin;cell differentiation;cell junction assembly;cell junction organization;cell migration;cell motility;cell surface receptor linked signaling pathway;cell-cell adhesion;cell-cell adhesion mediated by integrin;cell-substrate adhesion;cell-substrate junction assembly;cellular component assembly;cellular…	binding;cation binding;integrin binding;ion binding;metal ion binding;protein binding;protein complex binding;receptor binding	adherens junction;anchoring junction;cell junction;cell part;cell projection membrane;cell projection part;cell surface;cell-cell junction;cell-substrate adherens junction;cell-substrate junction;cytoplasmic part;cytoplasmic vesicle;endoplasmic reticulum;external side of plasma membrane;focal adhesion;Golgi apparatus;integrin complex;intracellular membrane-bounded organelle;intracellular organell…
29.1553	28.6102	NaN	NaN	6	6	6	12.3	12.3	12.3	85.025	0	24.919	885180000	18	0	0.950044	NaN	0	-	-	P11835	P11835	Integrin beta-2	Itgb2	Itgb2	activated T cell proliferation;biological adhesion;biological regulation;cell activation;cell adhesion;cell chemotaxis;cell migration;cell motility;cell proliferation;cell surface receptor linked signaling pathway;cell-cell adhesion;cell-matrix adhesion;cell-substrate adhesion;cellular component movement;cellular component organization;cellular component organization or biogenesis;cellular extrav…	binding;cation binding;cell adhesion molecule binding;enzyme binding;glycoprotein binding;ICAM-3 receptor activity;ion binding;kinase binding;metal ion binding;molecular transducer activity;protein binding;protein kinase binding;receptor activity;signal transducer activity;signaling receptor activity;transmembrane signaling receptor activity	alphaL-beta2 integrin complex;cell part;cell surface;extracellular membrane-bounded organelle;extracellular organelle;extracellular region part;extracellular vesicular exosome;integrin complex;macromolecular complex;membrane;membrane part;membrane raft;membrane-bounded organelle;membrane-bounded vesicle;organelle;plasma membrane part;protein complex;receptor complex;vesicle
28.9822	30.1988	29.7732	NaN	5	5	5	8.8	8.8	8.8	51.99	0	20.396	2521300000	20	0	0.949624	-0.182699	0	-	-	P11859	P11859	Angiotensinogen;Angiotensin-1;Angiotensin-2;Angiotensin-3;Angiotensin-4;Angiotensin 1-9;Angiotensin 1-7;Angiotensin 1-5;Angiotensin 1-4	Agt	Agt	biological regulation;circulatory system process;endocrine process;multicellular organismal process;positive regulation of biological process;positive regulation of cellular process;positive regulation of cytokine secretion;positive regulation of protein secretion;positive regulation of protein transport;positive regulation of secretion;positive regulation of transport;regulation of anatomical st…	-	extracellular region part;extracellular space
33.8631	33.49	33.9855	33.3633	44	44	44	75.7	75.7	75.7	60.448	0	302.27	44303000000	184	0.00182686	0.999548	0.0021534	0.00465355	-	-	P11983	P11983	T-complex protein 1 subunit alpha	Tcp1	Tcp1	binding of sperm to zona pellucida;biological regulation;cell recognition;cell-cell recognition;cellular macromolecule metabolic process;cellular metabolic process;cellular process;cellular process involved in reproduction;cellular protein metabolic process;establishment of localization;establishment of protein localization;interaction with host;interspecies interaction between organisms;macromol…	adenyl nucleotide binding;adenyl ribonucleotide binding;ATP binding;binding;enzyme binding;nucleotide binding;protein binding;purine nucleotide binding;purine ribonucleoside triphosphate binding;purine ribonucleotide binding;ribonucleotide binding;ubiquitin protein ligase binding	acrosomal vesicle;cell body;cell part;centrosome;chaperonin-containing T-complex;chromatin;chromosomal part;cytoplasmic membrane-bounded vesicle;cytoplasmic part;cytoplasmic vesicle;cytoskeletal part;cytosolic part;extracellular membrane-bounded organelle;extracellular organelle;extracellular region part;extracellular vesicular exosome;Golgi apparatus;heterochromatin;intracellular membrane-bounde…
29.3097	29.4951	28.5608	NaN	7	7	7	11.7	11.7	11.7	86.721	0	78.787	1556600000	12	0	0.949205	0.8416	0	-	-	P12023	P12023	Amyloid beta A4 protein;N-APP;Soluble APP-alpha;Soluble APP-beta;C99;Beta-amyloid protein 42;Beta-amyloid protein 40;C83;P3(42);P3(40);C80;Gamma-secretase C-terminal fragment 59;Gamma-secretase C-terminal fragment 57;Gamma-secretase C-terminal fragment 50;C31	App	App	adult behavior;adult locomotory behavior;alcohol metabolic process;anatomical structure development;anatomical structure morphogenesis;apoptosis;associative learning;axon cargo transport;axon choice point recognition;axon midline choice point recognition;axonogenesis;behavior;behavioral interaction between organisms;biological adhesion;biological regulation;calcium ion homeostasis;cation homeosta…	acetylcholine receptor binding;binding;carbohydrate binding;cation binding;DNA binding;endopeptidase inhibitor activity;endopeptidase regulator activity;enzyme activator activity;enzyme binding;enzyme inhibitor activity;enzyme regulator activity;glycosaminoglycan binding;heparin binding;identical protein binding;ion binding;metal ion binding;nucleic acid binding;pattern binding;peptidase activato…	apical part of cell;axon;cell junction;cell part;cell projection;cell projection part;cell surface;cell-cell junction;ciliary rootlet;cilium part;coated pit;coated vesicle;cytoplasm;cytoplasmic membrane-bounded vesicle;cytoplasmic part;cytoplasmic vesicle;cytoskeletal part;dendritic shaft;dendritic spine;endosome;ER to Golgi transport vesicle;extracellular membrane-bounded organelle;extracellular…
[truncated: 2,663 more rows]

## Sheet: Mitocarta proteins in data
Log2FC<-1	Mitocarta Log2FC<-1	Mitocarta proteins in data	Sum Log2FC<-1	Sum Mitocarta Log2FC<-1	Total Mitocarta		Log2FC>1	Mitocarta Log2FC>1	Mitocarta proteins in data	Sum Log2FC<-1	Sum Mitocarta Log2FC<-1	Total Mitocarta
Map7d2	Gls	Obscn	249	117	374		Osbpl9	Comt	Obscn	335	12	374
Accs	Hk2	Gls					Sh3pxd2b	Rpl10a	Gls
Armt1	Dld	Acacb					Ckap5	Rps15a	Acacb
Gls	Hsd17b10	Hk2					Ubr4	Rps14	Hk2
Hk2	Phb2	Endog					Rabgap1	Rps18	Endog
Cacna2d1	Gbas	Prdx6					Cad	Nucb2	Prdx6
Dld	Clpp	Dld					Ccdc6	Bax	Dld
Hsd17b10	Got2	Hsd17b10					Fga	Fkbp10	Hsd17b10
Mapk12	Mdh2	Prdx4					Gcn1l1	Nudt9	Prdx4
Casq1	Sod2	Gsto1					Myo1e	Slc25a1	Gsto1
Phb2	Cox5a	Phb2					Sec22b	Rab11fip5	Phb2
Prx	Cox4i1	Atpif1					Gtpbp1	Osbpl1a	Atpif1
Gbas	Prdx3	Ech1					Myh11		Ech1
Cd59a	Pdha1	Bcat2					Matn2		Bcat2
[truncated: 360 more rows]
